# Supplementary material for: Action potential-coupled Rho GTPase signaling drives presynaptic plasticity
Source: PubMed Central journal article supplement (PMC8285108; doi:10.7554/elife.63756), 2021-07-16
Supplement: elife-63756-transrepform.pdf [file elife-63756-transrepform.pdf]

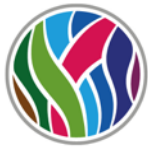

## eLife's transparent reporting form

We encourage authors to provide detailed information *within their submission* to facilitate the interpretation and replication of experiments. Authors can upload supporting documentation to indicate the use of appropriate reporting guidelines for health-related research (see [EQUATOR Network](#)), life science research (see the [BioSharing Information Resource](#)), or the [ARRIVE guidelines](#) for reporting work involving animal research. Where applicable, authors should refer to any relevant reporting standards documents in this form.

If you have any questions, please consult our Journal Policies and/or contact us: [editorial@elifesciences.org](mailto:editorial@elifesciences.org).

### Sample-size estimation

- You should state whether an appropriate sample size was computed when the study was being designed
- You should state the statistical method of sample size computation and any required assumptions
- If no explicit power analysis was used, you should describe how you decided what sample (replicate) size (number) to use

Please outline where this information can be found within the submission (e.g., sections or figure legends), or explain why this information doesn't apply to your submission:

No statistical methods were used to predetermine sample size, but approximate sample size was determined based on previous experience with similar published experiments. This information can be found in the Materials and Methods under "Statistics". Exact sample sizes used can be found in the Figure Legends.

### Replicates

- You should report how often each experiment was performed
- You should include a definition of biological versus technical replication
- The data obtained should be provided and sufficient information should be provided to indicate the number of independent biological and/or technical replicates
- If you encountered any outliers, you should describe how these were handled
- Criteria for exclusion/inclusion of data should be clearly stated
- High-throughput sequence data should be uploaded before submission, with a private link for reviewers provided (these are available from both GEO and ArrayExpress)

Please outline where this information can be found within the submission (e.g., sections or figure legends), or explain why this information doesn't apply to your submission:

Proteomics purifications were performed on 3 independent biological replicates. All electrophysiology experiments were replicated in 3 independent cultures. 2pFLIM experiments were performed on at least 4 independent slices. Candidate genes were excluded from the HiUGE screen if there was a low signal-to-noise ratio, or if the signal was below the detection threshold. For electrophysiology experiments, recordings were not analyzed if evoked currents were "polysynaptic" or if the series resistance was unstable (>20% change). 2pFLIM data were excluded if there was significant focal drift or if baseline fluctuations were >0.1ns due to low photon count. These criteria for data exclusions were predetermined. This information can be found in the respective Materials and Methods sections, and replicate values are also in the Figure Legends.

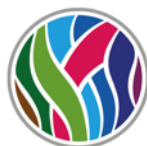

### Statistical reporting

- Statistical analysis methods should be described and justified
- Raw data should be presented in figures whenever informative to do so (typically when N per group is less than 10)
- For each experiment, you should identify the statistical tests used, exact values of N, definitions of center, methods of multiple test correction, and dispersion and precision measures (e.g., mean, median, SD, SEM, confidence intervals; and, for the major substantive results, a measure of effect size (e.g., Pearson's r, Cohen's d)
- Report exact p-values wherever possible alongside the summary statistics and 95% confidence intervals. These should be reported for all key questions and not only when the p-value is less than 0.05.

Please outline where this information can be found within the submission (e.g., sections or figure legends), or explain why this information doesn't apply to your submission:

All statistical methods are described in detail in the Materials and Methods under "Statistics". All bar graphs in the Figures are overlaid with single data points. The statistical test for each experiment can be found in the Figure Legends, along with exact values of N, test statistic, and p.

(For large datasets, or papers with a very large number of statistical tests, you may upload a single table file with tests, Ns, etc., with reference to sections in the manuscript.)

### Group allocation

- Indicate how samples were allocated into experimental groups (in the case of clinical studies, please specify allocation to treatment method); if randomization was used, please also state if restricted randomization was applied
- Indicate if masking was used during group allocation, data collection and/or data analysis

Please outline where this information can be found within the submission (e.g., sections or figure legends), or explain why this information doesn't apply to your submission:

Allocation to experimental groups was randomized for proteomics (by litter, with approximately equal amounts of male and female animals per group), electrophysiology (by coverslip), and 2pFLIM (by slice). Electrophysiological recordings from control and experimental coverslips were randomly interleaved during experimentation. The experimenter was not blinded to the condition during data collection. However, all experiments were analyzed blinded to the condition. This information can be found in the Materials and Methods.

### Additional data files ("source data")

- We encourage you to upload relevant additional data files, such as numerical data that are represented as a graph in a figure, or as a summary table
- Where provided, these should be in the most useful format, and they can be uploaded as "Source data" files linked to a main figure or table
- Include model definition files including the full list of parameters used
- Include code used for data analysis (e.g., R, MatLab)
- Avoid stating that data files are "available upon request"

Please indicate the figures or tables for which source data files have been provided:

Source data files have been provided for Figure 1 and Figure 2. Raw proteomics data have been deposited to the ProteomeXchange Consortium via the PRIDE partner repository with the dataset identifier PXD019342.
