# Supplementary material for: Action potential-coupled Rho GTPase signaling drives presynaptic plasticity
Source: eLife. 2021 Jul 16;10:e63756. doi: 10.7554/eLife.63756 (PMC8285108; doi:10.7554/eLife.63756)
Supplement: Figure 1—source data 1. [file elife-63756-fig1-data1.xlsx]

## Sheet: 0_Contents
Figure 1—source data 1. The Synapsin iBioID proteome.
	Sheet #	Name	Description
	1	Synapsin iBioID	Proteins significantly enriched in Synapsin-BioID2 samples
	2	Annotations	Clustergram annotations for Synapsin-BioID2 enriched proteins
	3	Edges	Protein-protein interactions in Synapsin iBioID network
	4	Raw Protein	Raw data and corresponding protein information

## Sheet: 1_Synapsin iBioID
1 Synapsin iBioID—Proteins significantly enriched in Synapsin-BioID2 samples.
Identified Protein Information			Log2 Normalized and Imputed Peptide Intensity									Statistics
UniProt ID	Description	Gene	Synapsin 1	Synapsin 2	Synapsin 3	Control 1	Control 2	Control 3	QC Pool 1	QC Pool 2	QC Pool 3	Log2 Enrichment (Synapsin/Control)	p value (t-test)	FDR-adjusted p value
Q3UHJ0	AP2-associated protein kinase 1 OS=Mus musculus GN=Aak1 PE=1 SV=2	Aak1	25.4474	26.0119	25.4546	19.547	19.5757	19.3097	24.4151	24.5409	24.385	6.18082	0.000140756	0.00143141
P62484	Abl interactor 2 OS=Mus musculus GN=Abi2 PE=1 SV=1	Abi2	20.8662	20.3765	21.7013	11.1864	11.1864	11.1864	18.5267	18.8292	18.3787	9.90059	0.00155534	0.00492387
Q4JIM5	Abelson tyrosine-protein kinase 2 OS=Mus musculus GN=Abl2 PE=1 SV=1	Abl2	16.4843	14.3754	16.9523	11.1864	11.1864	11.1864	14.6811	14.1915	14.2543	5.09972	0.0267204	0.0342602
Q8K4G5	Actin-binding LIM protein 1 OS=Mus musculus GN=Ablim1 PE=1 SV=1	Ablim1	19.4297	18.2518	18.7497	11.1864	11.1864	11.1864	18.2657	18.1844	18.0684	7.70528	0.001999	0.00576928
Q69ZX8	Actin-binding LIM protein 3 OS=Mus musculus GN=Ablim3 PE=1 SV=2	Ablim3	21.341	21.5533	21.5642	14.6619	14.9776	15.8295	20.4217	20.5163	20.7029	6.24579	0.00215207	0.00598886
Q9QYC0	Alpha-adducin OS=Mus musculus GN=Add1 PE=1 SV=2	Add1	17.0264	17.3615	17.839	11.1864	11.1864	11.1864	16.533	16.5856	16.4394	6.26145	0.00143261	0.00470998
Q9QZQ1	Afadin OS=Mus musculus GN=Afdn PE=1 SV=3	Afdn	19.0021	20.2859	19.3469	13.5031	13.8548	11.1864	18.9522	18.8715	18.9059	6.42468	0.0067029	0.0119728
Q8K2K6	Arf-GAP domain and FG repeat-containing protein 1 OS=Mus musculus GN=Agfg1 PE=1 SV=2	Agfg1	20.2048	20.9069	20.4378	15.2637	14.886	14.8367	19.5861	19.692	19.566	5.53825	7.4761e-05	0.00123457
Q7TQF7	Amphiphysin OS=Mus musculus GN=Amph PE=1 SV=1	Amph	19.4636	19.0031	19.8058	11.1864	11.1864	11.1864	18.2778	18.1612	18.1761	8.2745	0.000796093	0.0033256
Q9DBG3	AP-2 complex subunit beta OS=Mus musculus GN=Ap2b1 PE=1 SV=1	Ap2b1	19.1858	16.5364	18.849	13.1172	11.1864	11.1864	16.9427	16.9366	16.8353	6.42451	0.00460083	0.00930949
Q9JME5	AP-3 complex subunit beta-2 OS=Mus musculus GN=Ap3b2 PE=1 SV=2	Ap3b2	18.8989	15.879	19.2539	11.1864	11.1864	14.795	17.3933	17.264	17.4019	5.14927	0.0256554	0.033335
P98084	Amyloid beta A4 precursor protein-binding family A member 2 OS=Mus musculus GN=Apba2 PE=1 SV=2	Apba2	16.9826	15.3902	17.1011	11.1864	11.1864	11.1864	12.6126	12.6126	12.6126	5.48455	0.0106402	0.0167019
Q9QXJ1	Amyloid beta A4 precursor protein-binding family B member 1 OS=Mus musculus GN=Apbb1 PE=1 SV=3	Apbb1	22.0541	20.4344	21.8456	11.938	11.1864	12.9978	20.7337	20.716	20.5879	9.36839	0.000212212	0.00174484
Q9EPJ9	ADP-ribosylation factor GTPase-activating protein 1 OS=Mus musculus GN=Arfgap1 PE=1 SV=2	Arfgap1	25.4278	25.2436	25.2382	17.0593	18.219	18.552	23.8095	24.0233	23.9467	7.23507	0.00325953	0.00757146
Q9D8S3	ADP-ribosylation factor GTPase-activating protein 3 OS=Mus musculus GN=Arfgap3 PE=1 SV=2	Arfgap3	18.0619	17.6714	17.8512	11.1864	11.1864	11.1864	16.7219	16.8043	16.6773	6.68394	0.000285594	0.00198739
Q8K221	Arfaptin-2 OS=Mus musculus GN=Arfip2 PE=1 SV=2	Arfip2	23.757	22.2325	23.7313	18.5392	18.4051	15.4022	22.4084	22.5025	22.2026	5.42022	0.0158423	0.0227864
Q5FWK3	Rho GTPase-activating protein 1 OS=Mus musculus GN=Arhgap1 PE=1 SV=1	Arhgap1	21.9155	20.8268	22.5673	16.5306	11.1864	11.1864	20.706	20.6454	20.242	6.92027	0.0307748	0.0384129
Q811P8	Rho GTPase-activating protein 32 OS=Mus musculus GN=Arhgap32 PE=1 SV=2	Arhgap32	16.4665	16.9392	17.2947	11.1864	11.1864	11.1864	14.8885	14.5757	14.6903	5.75282	0.0017579	0.00535642
Q5SSM3	Rho GTPase-activating protein 44 OS=Mus musculus GN=Arhgap44 PE=1 SV=1	Arhgap44	17.4056	17.2656	17.3918	11.1864	11.1864	11.1864	16.8149	16.8211	16.7872	6.16929	5.21452e-05	0.00112557
Q61137	Astrotactin-1 OS=Mus musculus GN=Astn1 PE=1 SV=4	Astn1	15.8656	16.422	16.8226	11.1864	11.1864	11.1864	13.5171	14.4731	13.7103	5.23562	0.00285292	0.00697081
P50516	V-type proton ATPase catalytic subunit A OS=Mus musculus GN=Atp6v1a PE=1 SV=2	Atp6v1a	23.2721	22.1354	22.8459	15.4165	11.1864	14.5295	21.6551	21.8381	21.591	8.31974	0.0150357	0.0220013
P62814	V-type proton ATPase subunit B, brain isoform OS=Mus musculus GN=Atp6v1b2 PE=1 SV=1	Atp6v1b2	24.6053	25.114	24.3023	19.0357	18.699	18.1198	23.6672	23.7121	23.6761	6.04729	7.8648e-05	0.00123457
Q61140	Breast cancer anti-estrogen resistance protein 1 OS=Mus musculus GN=Bcar1 PE=1 SV=2	Bcar1	22.6051	22.0517	22.3843	15.3269	15.6977	16.4321	21.4329	21.4494	21.3988	6.4708	0.000432872	0.00233569
Q6PAJ1	Breakpoint cluster region protein OS=Mus musculus GN=Bcr PE=1 SV=3	Bcr	16.8788	17.7576	17.4618	11.1864	11.1864	11.1864	16.7219	16.6457	16.7934	6.22407	0.00174107	0.00533653
O08539	Myc box-dependent-interacting protein 1 OS=Mus musculus GN=Bin1 PE=1 SV=1	Bin1	22.395	21.9534	22.3171	16.7983	16.3022	16.5905	21.4205	21.6469	21.4314	5.65642	9.17871e-06	0.000470909
P28028	Serine/threonine-protein kinase B-raf OS=Mus musculus GN=Braf PE=1 SV=3	Braf	20.3523	18.4162	21.18	11.1864	11.1864	11.1864	18.0668	18.1849	18.2282	9.18318	0.00855682	0.0142982
Q80Y55	BSD domain-containing protein 1 OS=Mus musculus GN=Bsdc1 PE=1 SV=1	Bsdc1	21.2094	21.0058	20.901	13.1257	11.1864	13.9017	20.3516	20.4096	20.435	7.93178	0.00868132	0.0143801
O88737	Protein bassoon OS=Mus musculus GN=Bsn PE=1 SV=4	Bsn	26.9756	26.9615	26.9487	17.5546	18.3222	17.7567	25.5635	25.6928	25.6083	9.04644	0.000630667	0.00290843
Q80TJ1	Calcium-dependent secretion activator 1 OS=Mus musculus GN=Cadps PE=1 SV=3	Cadps	20.9847	18.1348	21.1377	12.1513	11.1864	12.5357	19.2661	19.3141	19.3384	8.5092	0.00689301	0.0120867
Q8BYR5	Calcium-dependent secretion activator 2 OS=Mus musculus GN=Cadps2 PE=1 SV=2	Cadps2	16.5861	16.4886	16.5646	11.1864	11.1864	11.1864	15.9719	16.2579	16.0845	5.36062	3.0417e-05	0.00084656
P0DP28	Calmodulin-3 OS=Mus musculus GN=Calm3 PE=1 SV=1	Calm3	20.1078	19.8104	19.2028	15.4725	11.1864	11.1864	12.6126	18.6083	18.4221	5.72577	0.0345099	0.0419641
P28652	Calcium/calmodulin-dependent protein kinase type II subunit beta OS=Mus musculus GN=Camk2b PE=1 SV=2	Camk2b	21.8989	20.6372	22.5168	16.004	14.4196	15.4	20.4405	20.5255	20.5751	6.4627	0.00101774	0.00390511
P47753	F-actin-capping protein subunit alpha-1 OS=Mus musculus GN=Capza1 PE=1 SV=4	Capza1	16.2917	16.4254	16.5478	11.1864	11.1864	11.1864	12.6126	12.6126	12.6126	5.23899	0.000199411	0.00169311
Q6P9K8	Caskin-1 OS=Mus musculus GN=Caskin1 PE=1 SV=2	Caskin1	18.4854	18.8963	18.8771	11.1864	11.1864	11.1864	16.8262	16.9909	17.3692	7.57854	0.000312852	0.00202736
O54901	OX-2 membrane glycoprotein OS=Mus musculus GN=Cd200 PE=1 SV=1	Cd200	18.726	19.4495	18.9023	11.1864	11.1864	11.1864	15.8603	12.6141	12.6126	7.87344	0.000771125	0.00324748
Q4VAA2	Protein CDV3 OS=Mus musculus GN=Cdv3 PE=1 SV=2	Cdv3	19.4217	19.6664	19.7109	12.8398	11.1864	12.6838	18.2809	17.8193	18.1978	7.20278	0.0041655	0.00890075
Q6A065	Centrosomal protein of 170 kDa OS=Mus musculus GN=Cep170 PE=1 SV=2	Cep170	15.8776	17.3084	17.367	11.1864	11.1864	11.1864	15.8926	15.8469	15.834	5.80746	0.00730948	0.0126632
P18760	Cofilin-1 OS=Mus musculus GN=Cfl1 PE=1 SV=3	Cfl1	19.0366	14.5788	18.5824	11.1864	11.1864	11.1864	16.8107	17.2012	16.8149	7.09338	0.0412775	0.0491535
Q99KN9	Clathrin interactor 1 OS=Mus musculus GN=Clint1 PE=1 SV=2	Clint1	19.3174	19.3272	19.8748	11.1864	11.1864	11.1864	17.6942	18.5267	18.628	8.34448	0.000489813	0.00246332
Q68FD5	Clathrin heavy chain 1 OS=Mus musculus GN=Cltc PE=1 SV=3	Cltc	18.5599	16.44	17.4676	11.1864	11.1864	11.1864	16.955	16.9069	17.0796	6.55326	0.00929932	0.0151005
P84086	Complexin-2 OS=Mus musculus GN=Cplx2 PE=1 SV=1	Cplx2	19.7992	19.5159	19.0376	11.1864	11.1864	11.1864	17.7627	17.7368	17.7917	8.2978	0.000722499	0.00306817
Q9DCT8	Cysteine-rich protein 2 OS=Mus musculus GN=Crip2 PE=1 SV=1	Crip2	19.4925	18.3544	19.6812	12.4572	11.1864	13.3218	17.4128	17.9189	17.9687	6.71663	0.00144689	0.00470998
P47941	Crk-like protein OS=Mus musculus GN=Crkl PE=1 SV=2	Crkl	18.1448	18.0376	17.9217	11.1864	11.1864	11.1864	17.0895	16.5865	16.2213	6.85116	8.84395e-05	0.00127255
P97427	Dihydropyrimidinase-related protein 1 OS=Mus musculus GN=Crmp1 PE=1 SV=1	Crmp1	20.2407	16.0653	21.2033	11.1864	11.1864	11.1864	20.6879	18.5893	18.0787	9.05627	0.0368714	0.0445207
Q9JMK2	Casein kinase I isoform epsilon OS=Mus musculus GN=Csnk1e PE=1 SV=2	Csnk1e	19.9335	21.3671	20.1116	14.8753	14.5589	14.2711	19.5721	19.5793	19.7228	6.0318	0.00235196	0.00633933
O88712	C-terminal-binding protein 1 OS=Mus musculus GN=Ctbp1 PE=1 SV=2	Ctbp1	21.8424	20.1777	21.0361	11.1864	11.1864	12.5412	20.1569	20.236	20.1914	9.38407	0.000145392	0.00144326
Q61301	Catenin alpha-2 OS=Mus musculus GN=Ctnna2 PE=1 SV=3	Ctnna2	19.4545	19.3819	20.171	14.2933	11.1864	11.5097	18.6074	18.8619	18.5711	6.67186	0.0132872	0.0199501
P30999	Catenin delta-1 OS=Mus musculus GN=Ctnnd1 PE=1 SV=2	Ctnnd1	20.3011	19.8663	20.1455	14.1211	15.03	14.9438	19.0452	18.9726	18.9316	5.36309	0.000722625	0.00306817
O35927	Catenin delta-2 OS=Mus musculus GN=Ctnnd2 PE=1 SV=1	Ctnnd2	22.7296	22.6191	22.8733	16.5755	16.2857	16.2026	21.8855	21.9632	21.9851	6.3808	5.81062e-06	0.000376197
Q60598	Src substrate cortactin OS=Mus musculus GN=Cttn PE=1 SV=2	Cttn	25.9244	25.7156	26.0901	18.8528	19.4529	18.9924	24.8302	24.945	24.9173	6.79535	3.32392e-05	0.00084656
B9EJA2	Cortactin-binding protein 2 OS=Mus musculus GN=Cttnbp2 PE=1 SV=2	Cttnbp2	18.5114	18.1523	19.1324	11.1864	11.1864	13.0328	17.4344	17.7655	17.458	6.57071	0.0027197	0.00683886
P97792	Coxsackievirus and adenovirus receptor homolog OS=Mus musculus GN=Cxadr PE=1 SV=1	Cxadr	19.8989	19.7994	19.9919	14.2439	14.6301	13.9113	18.9725	19.169	18.8872	5.60717	0.000697701	0.00303705
Q5SQX6	Cytoplasmic FMR1-interacting protein 2 OS=Mus musculus GN=Cyfip2 PE=1 SV=2	Cyfip2	20.6718	18.6391	21.297	12.4672	13.4327	11.1864	19.421	19.7231	19.4061	7.93287	0.0019077	0.00564679
Q9QXS6	Drebrin OS=Mus musculus GN=Dbn1 PE=1 SV=4	Dbn1	20.9045	21.1591	20.9724	16.0457	14.1047	15.2865	19.7533	19.9585	19.8158	5.66677	0.00823457	0.0138942
Q62418	Drebrin-like protein OS=Mus musculus GN=Dbnl PE=1 SV=2	Dbnl	22.2141	22.4608	22.3539	16.2004	15.161	15.1131	21.1403	21.1608	21.1252	6.76224	0.00192466	0.00566462
Q9WV69	Dematin OS=Mus musculus GN=Dmtn PE=1 SV=1	Dmtn	21.0139	21.8494	21.5065	16.3552	15.8183	14.6861	20.0589	20.3066	20.1287	5.72344	0.00200477	0.00576928
Q8BPN8	DmX-like protein 2 OS=Mus musculus GN=Dmxl2 PE=1 SV=3	Dmxl2	19.1064	15.8928	19.306	11.1864	11.1864	11.9662	17.488	17.4848	17.4042	7.19979	0.0217788	0.0289268
Q80TZ3	Putative tyrosine-protein phosphatase auxilin OS=Mus musculus GN=Dnajc6 PE=1 SV=2	Dnajc6	21.3819	21.7845	21.5414	14.6285	11.1864	13.7069	20.7086	20.7606	20.5395	7.83934	0.0137923	0.0206228
P39053	Dynamin-1 OS=Mus musculus GN=Dnm1 PE=1 SV=2	Dnm1	22.8112	22.0268	22.6492	16.9258	16.5106	16.3117	21.7065	21.612	21.588	5.92745	6.62386e-05	0.00123457
O08553	Dihydropyrimidinase-related protein 2 OS=Mus musculus GN=Dpysl2 PE=1 SV=2	Dpysl2	23.0529	23.7174	23.2508	18.4918	18.2919	17.7363	22.1467	22.207	22.2343	5.16068	7.57378e-05	0.00123457
Q61062	Segment polarity protein dishevelled homolog DVL-3 OS=Mus musculus GN=Dvl3 PE=1 SV=2	Dvl3	17.9113	17.517	18.2333	12.9737	11.1864	12.6716	17.0822	17.3178	17.0843	5.45685	0.00465585	0.00938416
Q9D8Y0	EF-hand domain-containing protein D2 OS=Mus musculus GN=Efhd2 PE=1 SV=1	Efhd2	19.2416	19.2099	19.1775	11.1864	11.1864	11.1864	15.3022	15.195	15.0975	8.02351	5.32876e-06	0.000376197
Q8CHU3	Epsin-2 OS=Mus musculus GN=Epn2 PE=1 SV=1	Epn2	17.1526	14.9085	18.0312	11.1864	11.1864	11.1864	14.9871	15.3128	14.7986	5.98988	0.0272998	0.0349168
Q6PH08	ERC protein 2 OS=Mus musculus GN=Erc2 PE=1 SV=2	Erc2	21.9065	21.6621	21.8969	11.1864	11.1864	13.7575	20.7767	20.8304	20.8893	9.23511	0.00719876	0.0125133
Q3TY60	Protein FAM131B OS=Mus musculus GN=Fam131b PE=1 SV=1	Fam131b	23.8781	24.7282	23.9063	19.2195	19.1511	18.4899	23.1782	23.3466	23.3897	5.23875	0.000166468	0.00153985
Q14CH0	Protein FAM171B OS=Mus musculus GN=Fam171b PE=1 SV=2	Fam171b	19.8252	19.6952	21.0586	12.709	11.1864	11.1864	18.7233	18.6973	18.6097	8.44655	0.000252549	0.00194888
O08917	Flotillin-1 OS=Mus musculus GN=Flot1 PE=1 SV=1	Flot1	19.0674	17.7811	19.388	11.1864	11.1864	11.1864	17.4785	17.6795	17.5587	7.70681	0.00419263	0.00890075
P48320	Glutamate decarboxylase 2 OS=Mus musculus GN=Gad2 PE=1 SV=1	Gad2	18.8686	19.1024	18.7256	11.1864	11.1864	11.1864	17.7578	18.4827	18.6066	7.72086	0.000202651	0.00169311
Q99KY4	Cyclin-G-associated kinase OS=Mus musculus GN=Gak PE=1 SV=2	Gak	18.803	17.129	19.272	12.7373	11.1864	13.3529	16.697	16.8372	16.7182	5.97454	0.00284814	0.00697081
P06837	Neuromodulin OS=Mus musculus GN=Gap43 PE=1 SV=1	Gap43	19.1436	19.4462	19.2487	14.8165	11.1864	12.73	18.4159	18.5	18.5813	5.65703	0.0255161	0.033335
Q68FF6	ARF GTPase-activating protein GIT1 OS=Mus musculus GN=Git1 PE=1 SV=1	Git1	20.1949	19.1096	20.4128	13.274	11.1864	13.0826	18.8008	18.9074	19.0232	7.24037	0.00167791	0.00517356
Q8C419	Probable G-protein coupled receptor 158 OS=Mus musculus GN=Gpr158 PE=1 SV=2	Gpr158	20.0746	19.3741	20.8444	13.3272	11.1864	11.1864	18.4862	18.784	18.924	7.93916	0.00154657	0.00492387
Q2NL51	Glycogen synthase kinase-3 alpha OS=Mus musculus GN=Gsk3a PE=1 SV=2	Gsk3a	17.7431	18.3131	18.7205	11.1864	11.1864	11.1864	16.8992	16.3232	16.991	7.12666	0.00160234	0.00503038
Q9WV60	Glycogen synthase kinase-3 beta OS=Mus musculus GN=Gsk3b PE=1 SV=2	Gsk3b	18.4297	15.6616	19.7337	11.1864	11.1864	11.1864	15.1011	15.0381	12.6126	7.51271	0.0301642	0.037833
Q9CX00	IST1 homolog OS=Mus musculus GN=Ist1 PE=1 SV=1	Ist1	21.5372	20.3284	21.4338	14.9712	11.1864	15.2772	20.5253	20.7059	20.5768	6.59971	0.0236501	0.0310933
Q9Z0R4	Intersectin-1 OS=Mus musculus GN=Itsn1 PE=1 SV=2	Itsn1	18.4936	18.3276	18.9136	11.1864	11.1864	11.1864	17.8301	18.2644	17.789	7.41341	0.000555986	0.00266669
Q9Z0R6	Intersectin-2 OS=Mus musculus GN=Itsn2 PE=1 SV=2	Itsn2	17.5928	16.0599	18.0008	11.1864	11.1864	11.1864	17.6884	16.7251	17.1172	6.23956	0.00945928	0.0152171
Q5DTX6	Junctional protein associated with coronary artery disease OS=Mus musculus GN=Jcad PE=1 SV=2	Jcad	18.6144	20.1343	18.6413	11.9634	13.0076	11.1864	17.7913	17.9222	17.9916	7.07357	0.0006357	0.00290843
Q80TK0	Uncharacterized protein KIAA1107 OS=Mus musculus GN=Kiaa1107 PE=1 SV=5	Kiaa1107	17.6026	18.7461	18.3837	11.1864	11.1864	11.1864	17.5634	17.6449	17.6839	7.13213	0.00227749	0.00620916
P28740	Kinesin-like protein KIF2A OS=Mus musculus GN=Kif2a PE=1 SV=2	Kif2a	14.4547	17.9401	17.6315	12.268	11.1864	11.1864	15.3233	16.9639	17.0335	5.63582	0.0340142	0.0416533
P28738	Kinesin heavy chain isoform 5C OS=Mus musculus GN=Kif5c PE=1 SV=3	Kif5c	16.0949	15.4927	16.7804	11.1864	11.1864	11.1864	15.2512	15.4441	14.9134	5.03149	0.00563101	0.0108032
Q61792	LIM and SH3 domain protein 1 OS=Mus musculus GN=Lasp1 PE=1 SV=1	Lasp1	23.8607	24.3296	23.9674	19.2717	18.52	17.1521	23.0969	23.2388	23.1626	5.513	0.00877243	0.0143801
Q80U28	MAP kinase-activating death domain protein OS=Mus musculus GN=Madd PE=1 SV=2	Madd	17.44	17.2705	18.7027	12.5842	11.1864	11.1864	17.2347	17.24	17.3038	6.14153	0.000694294	0.00303705
Q6RHR9	Membrane-associated guanylate kinase, WW and PDZ domain-containing protein 1 OS=Mus musculus GN=Magi1 PE=1 SV=1	Magi1	19.1077	18.5342	19.3426	11.1864	11.1864	11.1864	17.552	17.5914	17.5901	7.84668	0.000944232	0.00370539
Q9WVQ1	Membrane-associated guanylate kinase, WW and PDZ domain-containing protein 2 OS=Mus musculus GN=Magi2 PE=1 SV=2	Magi2	19.6995	19.1279	20.1807	11.1864	11.1864	11.1864	18.9807	18.7266	19.0554	8.54578	0.00128435	0.00446506
Q62073	Mitogen-activated protein kinase kinase kinase 7 OS=Mus musculus GN=Map3k7 PE=1 SV=1	Map3k7	17.9086	17.7497	17.5219	11.1864	11.1864	11.1864	17.0028	16.9066	16.6234	6.54894	0.000294221	0.00200534
Q61161	Mitogen-activated protein kinase kinase kinase kinase 2 OS=Mus musculus GN=Map4k2 PE=1 SV=1	Map4k2	15.5956	16.2723	16.7312	11.1864	11.1864	11.1864	12.6126	12.6126	12.6126	5.08593	0.00430013	0.00896394
P10637	Microtubule-associated protein tau OS=Mus musculus GN=Mapt PE=1 SV=3	Mapt	25.1565	26.2481	25.5878	19.6106	18.6345	18.7557	24.6712	24.7998	24.913	6.66576	0.00011332	0.00130985
Q9CWZ7	Gamma-soluble NSF attachment protein OS=Mus musculus GN=Napg PE=1 SV=1	Napg	17.917	17.6195	17.2444	11.1864	11.1864	11.1864	12.6126	16.8663	12.6126	6.43312	0.000921251	0.00367083
Q8CH77	Neuron navigator 1 OS=Mus musculus GN=Nav1 PE=1 SV=2	Nav1	17.557	18.7886	17.7617	11.1864	11.1864	11.1864	17.3236	23.1361	23.4591	6.95577	0.00308024	0.00729633
Q9EPN1	Neurobeachin OS=Mus musculus GN=Nbea PE=1 SV=1	Nbea	18.0243	16.4446	18.612	11.6526	11.1864	11.1864	15.8178	16.3077	16.4138	6.58479	0.00750168	0.0128545
P13595	Neural cell adhesion molecule 1 OS=Mus musculus GN=Ncam1 PE=1 SV=3	Ncam1	19.8164	19.7971	19.9932	14.5967	14.5593	15.1362	17.8217	17.6879	17.7923	5.08265	0.000480488	0.00246332
Q9DC07	LIM zinc-binding domain-containing Nebulette OS=Mus musculus GN=Nebl PE=1 SV=1	Nebl	21.822	22.0083	22.0542	15.1029	13.7655	15.0167	20.7482	20.8065	20.4933	7.22192	0.00281222	0.00697
P46460	Vesicle-fusing ATPase OS=Mus musculus GN=Nsf PE=1 SV=2	Nsf	21.0582	19.5341	21.1081	15.3037	13.3783	15.6723	19.3764	19.5467	19.5696	5.65422	0.00378809	0.00850592
O08919	Numb-like protein OS=Mus musculus GN=Numbl PE=1 SV=3	Numbl	19.2121	17.8997	20.3346	11.1864	11.1864	14.1716	17.5266	17.7528	17.4219	6.55548	0.00634278	0.0116509
Q6P5U7	NACHT and WD repeat domain-containing protein 2 OS=Mus musculus GN=Nwd2 PE=1 SV=2	Nwd2	19.7144	18.4831	19.9493	11.1864	11.1864	11.1864	17.8592	17.931	17.8764	8.32307	0.00306357	0.00729633
Q8BM65	Neuronal tyrosine-phosphorylated phosphoinositide-3-kinase adapter 2 OS=Mus musculus GN=Nyap2 PE=1 SV=1	Nyap2	20.1911	20.0764	20.6847	14.6875	14.3957	14.4604	19.0056	19.3622	19.0194	5.82227	0.000140934	0.00143141
Q6NVF0	Inositol polyphosphate 5-phosphatase OCRL-1 OS=Mus musculus GN=Ocrl PE=1 SV=1	Ocrl	17.9269	15.8864	19.1373	11.1864	11.1864	11.1864	16.4588	16.0995	15.6817	6.98624	0.0208652	0.0278561
Q61644	Protein kinase C and casein kinase substrate in neurons protein 1 OS=Mus musculus GN=Pacsin1 PE=1 SV=1	Pacsin1	18.4947	19.1754	18.3286	14.0497	11.1864	13.7481	18.2239	18.4471	18.5081	5.28741	0.018441	0.025271
O88643	Serine/threonine-protein kinase PAK 1 OS=Mus musculus GN=Pak1 PE=1 SV=1	Pak1	19.3958	19.0655	19.4654	12.673	11.1864	11.1864	18.6219	18.8164	18.7296	7.45402	0.00270415	0.00683293
Q9JHU2	Palmdelphin OS=Mus musculus GN=Palmd PE=1 SV=1	Palmd	16.9851	16.5405	17.4782	11.1864	11.1864	11.1864	13.6304	16.5594	13.1918	5.86554	0.002162	0.00598886
Q3UHX2	28 kDa heat- and acid-stable phosphoprotein OS=Mus musculus GN=Pdap1 PE=1 SV=1	Pdap1	18.8617	16.0874	19.5528	11.1864	13.9356	12.8318	17.2959	17.198	16.8869	5.70043	0.0164521	0.0233892
Q9DBX2	Phosducin-like protein OS=Mus musculus GN=Pdcl PE=1 SV=1	Pdcl	17.9787	17.0536	17.9987	11.1864	11.1864	11.1864	15.3739	15.4762	15.185	6.5525	0.00229904	0.00623509
Q2M3X8	Phosphatase and actin regulator 1 OS=Mus musculus GN=Phactr1 PE=1 SV=1	Phactr1	18.152	15.2182	18.2764	11.1864	11.1864	11.1864	14.8168	16.6291	16.9604	6.5318	0.0263901	0.03409
Q7M6Y3	Phosphatidylinositol-binding clathrin assembly protein OS=Mus musculus GN=Picalm PE=1 SV=1	Picalm	21.0407	21.1451	21.1733	15.8911	14.9171	15.0106	20.0863	20.0894	20.1174	5.77744	0.0024458	0.00649705
Q62083	PRKCA-binding protein OS=Mus musculus GN=Pick1 PE=1 SV=2	Pick1	17.4167	17.1947	16.9321	11.1864	11.1864	11.1864	12.6126	12.6126	12.6126	6.00826	0.000545416	0.00266126
O35954	Membrane-associated phosphatidylinositol transfer protein 1 OS=Mus musculus GN=Pitpnm1 PE=1 SV=1	Pitpnm1	18.9275	18.745	19.2188	11.1864	11.1864	11.1864	17.9585	17.9269	17.7223	7.79069	0.000314572	0.00202736
Q9QXS1	Plectin OS=Mus musculus GN=Plec PE=1 SV=3	Plec	17.6259	16.6474	17.333	11.8468	11.1864	12.4746	15.5699	15.2529	15.0097	5.32749	0.000464922	0.00240829
Q7TME0	Phospholipid phosphatase-related protein type 4 OS=Mus musculus GN=Plppr4 PE=1 SV=2	Plppr4	18.8088	17.932	19.3376	12.3853	11.1864	12.3975	17.5758	17.5344	17.3628	6.71305	0.000307919	0.00202736
Q8BSS9	Liprin-alpha-2 OS=Mus musculus GN=Ppfia2 PE=1 SV=2	Ppfia2	17.6109	15.6916	18.6228	11.1864	11.1864	12.5569	18.1779	18.4045	18.2235	5.94151	0.00968021	0.0154764
P60469	Liprin-alpha-3 OS=Mus musculus GN=Ppfia3 PE=1 SV=2	Ppfia3	17.3308	17.3744	17.4167	11.1864	11.1864	11.1864	14.6381	13.9624	14.4792	6.18798	1.6051e-05	0.000692825
P49443	Protein phosphatase 1A OS=Mus musculus GN=Ppm1a PE=1 SV=1	Ppm1a	19.6318	19.7842	20.0037	13.1906	11.1864	13.2687	18.9883	18.9663	19.1416	7.00434	0.00751916	0.0128545
P62137	Serine/threonine-protein phosphatase PP1-alpha catalytic subunit OS=Mus musculus GN=Ppp1ca PE=1 SV=1	Ppp1ca	18.7069	15.2393	19.0105	11.1864	11.1864	11.1864	15.8182	16.2812	15.8631	7.15255	0.0332633	0.0408303
Q9DCL8	Protein phosphatase inhibitor 2 OS=Mus musculus GN=Ppp1r2 PE=1 SV=3	Ppp1r2	17.4984	18.2366	17.3157	11.1864	11.1864	11.1864	17.2372	17.2877	17.1074	6.5545	0.00187196	0.00557285
Q6R891	Neurabin-2 OS=Mus musculus GN=Ppp1r9b PE=1 SV=1	Ppp1r9b	19.3217	20.1027	19.3892	13.4785	11.1864	12.8365	18.99	18.3771	18.21	6.87266	0.0045177	0.00917713
P63328	Serine/threonine-protein phosphatase 2B catalytic subunit alpha isoform OS=Mus musculus GN=Ppp3ca PE=1 SV=1	Ppp3ca	22.0076	21.5411	21.6142	16.2183	15.5824	13.0668	20.7542	20.921	20.9662	6.29024	0.0178289	0.0249605
Q7TSI3	Serine/threonine-protein phosphatase 6 regulatory subunit 1 OS=Mus musculus GN=Ppp6r1 PE=1 SV=1	Ppp6r1	17.2084	18.0799	17.4111	11.1864	11.1864	12.5997	16.5817	16.6241	20.9784	5.7935	0.00132677	0.00458178
E9PUL5	Proline-rich transmembrane protein 2 OS=Mus musculus GN=Prrt2 PE=1 SV=1	Prrt2	19.248	19.5675	18.7291	14.767	11.1864	11.1864	18.5414	18.5281	18.5454	5.81664	0.0255032	0.033335
Q8BIW1	Exopolyphosphatase PRUNE1 OS=Mus musculus GN=Prune1 PE=1 SV=1	Prune1	21.8	20.0964	21.8878	12.3409	11.1864	11.1864	19.2794	19.6227	19.4156	9.77903	0.000369899	0.00222669
Q52KR3	Protein prune homolog 2 OS=Mus musculus GN=Prune2 PE=1 SV=2	Prune2	18.5494	18.7874	18.5519	11.1864	11.1864	11.1864	17.9539	17.9518	17.9221	7.44755	0.000112434	0.00130985
Q9QVP9	Protein-tyrosine kinase 2-beta OS=Mus musculus GN=Ptk2b PE=1 SV=2	Ptk2b	16.6577	16.7507	16.838	11.1864	11.1864	11.1864	13.0247	12.9345	12.6126	5.56427	8.75834e-05	0.00127255
Q99P58	Ras-related protein Rab-27B OS=Mus musculus GN=Rab27b PE=1 SV=3	Rab27b	17.2247	15.345	16.9213	11.1864	11.1864	11.1864	16.9837	16.9489	17.3124	5.51134	0.0118232	0.0181734
P63011	Ras-related protein Rab-3A OS=Mus musculus GN=Rab3a PE=1 SV=1	Rab3a	23.8014	21.7385	23.7266	17.2937	16.9679	14.2596	22.5456	22.4635	22.5255	6.69677	0.00582705	0.0109085
P62823	Ras-related protein Rab-3C OS=Mus musculus GN=Rab3c PE=1 SV=1	Rab3c	18.7905	18.6022	18.6207	11.1864	11.1864	11.1864	16.8595	17.2585	16.7992	7.48724	6.41371e-05	0.00123457
P63001	Ras-related C3 botulinum toxin substrate 1 OS=Mus musculus GN=Rac1 PE=1 SV=1	Rac1	16.5977	16.8833	17.1217	11.1864	11.1864	11.1864	12.6126	12.6126	12.6126	5.69693	0.000709916	0.00306449
Q5SVL6	Rap1 GTPase-activating protein 2 OS=Mus musculus GN=Rap1gap2 PE=1 SV=1	Rap1gap2	16.7948	17.2427	17.5841	11.1864	11.1864	11.1864	12.6126	12.6126	12.6126	6.05632	0.00143765	0.00470998
Q9Z268	RasGAP-activating-like protein 1 OS=Mus musculus GN=Rasal1 PE=1 SV=2	Rasal1	17.5195	16.8387	18.1347	11.1864	11.1864	11.1864	16.6949	16.7672	16.8861	6.40602	0.00349834	0.00801832
Q80U40	RIMS-binding protein 2 OS=Mus musculus GN=Rimbp2 PE=1 SV=3	Rimbp2	17.5876	15.8488	18.3821	11.1864	11.1864	11.1864	15.1216	14.6157	16.2844	6.41747	0.0147711	0.0216754
Q3TDK6	Protein rogdi homolog OS=Mus musculus GN=Rogdi PE=1 SV=2	Rogdi	22.0714	20.2412	20.9298	13.2157	11.1864	12.8619	20.4228	20.4575	20.3946	8.63049	0.000522896	0.00257964
P47708	Rabphilin-3A OS=Mus musculus GN=Rph3a PE=1 SV=2	Rph3a	17.5707	16.1845	18.0629	11.1864	11.1864	11.1864	16.1712	15.8149	15.6104	6.27915	0.00842946	0.0141309
Q9D394	Protein RUFY3 OS=Mus musculus GN=Rufy3 PE=1 SV=1	Rufy3	25.9696	25.094	25.7921	18.4747	17.4516	17.3845	24.6921	24.6556	24.7596	7.80325	9.77416e-05	0.00130985
Q8K021	Secretory carrier-associated membrane protein 1 OS=Mus musculus GN=Scamp1 PE=1 SV=1	Scamp1	23.4181	23.4679	23.1874	14.0625	11.1864	14.3546	22.5281	22.6425	22.7537	9.64617	0.00936577	0.0151608
Q9CZC8	Secernin-1 OS=Mus musculus GN=Scrn1 PE=1 SV=1	Scrn1	20.4525	21.2267	20.5839	13.8034	11.1864	12.7683	19.585	19.8733	19.6194	7.85389	0.00496489	0.00989159
Q9Z1S5	Neuronal-specific septin-3 OS=Mus musculus GN=Sept3 PE=1 SV=2	Sept3	19.2819	17.2325	19.564	13.7917	11.1864	13.5973	18.2979	18.2957	18.1877	5.76004	0.0066636	0.0119728
Q9Z2Q6	Septin-5 OS=Mus musculus GN=Sept5 PE=1 SV=2	Sept5	20.7752	19.7888	21.0217	15.7583	11.1864	14.8376	19.6304	19.6775	19.4902	5.794	0.034511	0.0419641
Q80UG5	Septin-9 OS=Mus musculus GN=Sept9 PE=1 SV=1	Sept9	17.7113	17.2441	17.8542	12.289	11.1864	12.28	16.1626	16.6913	16.5456	5.62346	0.000881232	0.00362283
Q62419	Endophilin-A2 OS=Mus musculus GN=Sh3gl1 PE=1 SV=1	Sh3gl1	23.9168	23.3473	23.5178	16.4354	17.645	15.667	22.2354	22.445	22.4941	6.8003	0.00396422	0.00871269
Q62420	Endophilin-A1 OS=Mus musculus GN=Sh3gl2 PE=1 SV=2	Sh3gl2	24.5928	23.7256	24.4843	17.1131	15.8557	15.3021	23.1362	23.4018	23.4678	8.01925	0.000902545	0.00362419
Q62421	Endophilin-A3 OS=Mus musculus GN=Sh3gl3 PE=1 SV=1	Sh3gl3	21.0683	19.3195	20.4613	14.2585	16.1532	11.1864	18.7926	19.0411	18.8274	5.50215	0.0355004	0.0429654
Q8R3V5	Endophilin-B2 OS=Mus musculus GN=Sh3glb2 PE=1 SV=2	Sh3glb2	17.2027	15.1693	15.9219	11.1864	11.1864	11.1864	15.3584	15.4231	15.6462	5.15893	0.0142928	0.0211534
D3YZU1	SH3 and multiple ankyrin repeat domains protein 1 OS=Mus musculus GN=Shank1 PE=1 SV=1	Shank1	17.9954	17.7924	19.1435	14.3357	11.1864	12.9604	16.8675	16.6438	16.4932	5.1068	0.0142144	0.0210976
A2ALU4	Protein Shroom2 OS=Mus musculus GN=Shroom2 PE=1 SV=1	Shroom2	18.4445	18.0925	18.4253	11.1864	11.1864	11.1864	17.8957	17.7987	17.7503	7.14317	0.000256427	0.00194888
Q8C0T5	Signal-induced proliferation-associated 1-like protein 1 OS=Mus musculus GN=Sipa1l1 PE=1 SV=2	Sipa1l1	20.4693	20.7886	20.8065	13.5825	14.4428	12.3436	19.8737	20.004	19.8576	7.00309	0.00574646	0.0108638
P97797	Tyrosine-protein phosphatase non-receptor type substrate 1 OS=Mus musculus GN=Sirpa PE=1 SV=1	Sirpa	19.6419	18.0676	19.5116	13.4946	11.1864	14.3166	17.9165	17.9798	17.8282	5.74651	0.0100146	0.0158821
A2AQ25	Sickle tail protein OS=Mus musculus GN=Skt PE=1 SV=1	Skt	21.6271	21.8514	22.0589	15.3828	11.1864	14.212	20.7704	20.9084	20.8744	7.47493	0.0213109	0.0283781
Q8BLE7	Vesicular glutamate transporter 2 OS=Mus musculus GN=Slc17a6 PE=1 SV=1	Slc17a6	22.2489	20.5508	21.7338	11.1864	11.1864	11.1864	20.1857	20.323	19.8235	10.4833	0.00236195	0.00633933
P43006	Excitatory amino acid transporter 2 OS=Mus musculus GN=Slc1a2 PE=1 SV=1	Slc1a2	20.973	18.6095	20.7035	15.1716	15.3076	13.4105	19.1546	19.0434	18.9113	5.55922	0.00537827	0.0103953
O35633	Vesicular inhibitory amino acid transporter OS=Mus musculus GN=Slc32a1 PE=1 SV=3	Slc32a1	19.0033	18.8182	19.2276	11.1864	11.1864	11.1864	18.235	18.6066	18.5253	7.83971	0.000228486	0.00184934
Q8BJI1	Sodium-dependent neutral amino acid transporter SLC6A17 OS=Mus musculus GN=Slc6a17 PE=1 SV=1	Slc6a17	24.1527	24.4822	24.0205	13.4562	11.1864	13.5991	22.9158	23.1475	22.978	11.1517	0.00370933	0.00839054
Q91VZ6	Stromal membrane-associated protein 1 OS=Mus musculus GN=Smap1 PE=1 SV=1	Smap1	22.3243	22.249	22.6876	15.5804	16.9443	13.4426	20.9327	21.3174	21.3028	6.51148	0.0185534	0.025358
Q7TN29	Stromal membrane-associated protein 2 OS=Mus musculus GN=Smap2 PE=1 SV=1	Smap2	18.5646	18.6894	18.8043	11.1864	11.1864	11.1864	12.6126	12.6126	15.5266	7.50304	8.51383e-05	0.00127255
P60879	Synaptosomal-associated protein 25 OS=Mus musculus GN=Snap25 PE=1 SV=1	Snap25	22.5233	22.371	21.5146	16.375	11.1864	15.7528	21.2685	21.2922	21.0186	6.6634	0.0381728	0.0458782
Q8R570	Synaptosomal-associated protein 47 OS=Mus musculus GN=Snap47 PE=1 SV=1	Snap47	19.023	18.0855	18.993	11.1864	11.1864	11.1864	17.2027	17.192	17.1253	7.57447	0.00167175	0.00517356
O55042	Alpha-synuclein OS=Mus musculus GN=Snca PE=1 SV=2	Snca	18.9116	17.3133	20.0082	11.1864	11.1864	11.1864	17.3483	17.39	17.4355	7.93463	0.0105476	0.0166575
Q9WV80	Sorting nexin-1 OS=Mus musculus GN=Snx1 PE=1 SV=1	Snx1	18.7133	18.7925	18.8676	11.1864	11.1864	11.1864	16.3833	16.3634	16.3216	7.60607	3.43214e-05	0.00084656
Q8CE50	Sorting nexin-30 OS=Mus musculus GN=Snx30 PE=1 SV=1	Snx30	18.6249	15.9424	18.6374	11.1864	11.1864	11.1864	15.4468	15.3215	15.2617	6.96753	0.018222	0.0251686
Q9CY18	Sorting nexin-7 OS=Mus musculus GN=Snx7 PE=1 SV=1	Snx7	16.8921	16.2126	16.4728	11.1864	11.1864	11.1864	16.7623	16.256	16.147	5.36697	0.00137145	0.00464027
Q62417	Sorbin and SH3 domain-containing protein 1 OS=Mus musculus GN=Sorbs1 PE=1 SV=2	Sorbs1	20.0135	18.2526	20.5435	11.1864	11.1864	11.1864	18.0983	17.6812	17.9926	8.69578	0.0066996	0.0119728
Q3UTJ2	Sorbin and SH3 domain-containing protein 2 OS=Mus musculus GN=Sorbs2 PE=1 SV=2	Sorbs2	18.4306	15.8044	19.2373	11.1864	11.1864	11.1864	15.7125	15.5766	16.1832	7.20084	0.0235208	0.031002
O55106	Striatin OS=Mus musculus GN=Strn PE=1 SV=2	Strn	21.1843	21.0422	22.0732	15.2738	14.6905	14.2927	19.4283	19.6277	19.8211	6.70006	0.000111227	0.00130985
P58404	Striatin-4 OS=Mus musculus GN=Strn4 PE=1 SV=2	Strn4	20.0378	18.7592	20.7028	15.0994	11.1864	15.6595	18.4567	18.573	18.7901	5.17701	0.0385993	0.0462834
O35526	Syntaxin-1A OS=Mus musculus GN=Stx1a PE=1 SV=3	Stx1a	17.744	14.7571	17.3999	11.1864	11.1864	11.1864	15.6333	15.8586	15.5995	5.90919	0.0287155	0.0363682
O08599	Syntaxin-binding protein 1 OS=Mus musculus GN=Stxbp1 PE=1 SV=2	Stxbp1	22.4281	23.5795	22.4454	16.5769	17.0215	16.107	20.9638	20.8519	20.5918	6.30868	0.000348787	0.00215087
Q5DQR4	Syntaxin-binding protein 5-like OS=Mus musculus GN=Stxbp5l PE=1 SV=1	Stxbp5l	17.7685	17.6602	17.6522	11.1864	11.1864	11.1864	17.3409	18.1394	17.6259	6.50821	3.32268e-05	0.00084656
Q9JIS5	Synaptic vesicle glycoprotein 2A OS=Mus musculus GN=Sv2a PE=1 SV=1	Sv2a	24.1054	23.1555	23.84	13.9159	14.6222	13.487	22.4177	22.637	22.3654	9.66731	2.9223e-05	0.00084656
Q8BG39	Synaptic vesicle glycoprotein 2B OS=Mus musculus GN=Sv2b PE=1 SV=1	Sv2b	19.9469	19.1429	19.9903	11.1864	13.6503	11.1864	18.6488	18.8186	18.8257	7.23071	0.00644018	0.0117053
Q69ZS6	Synaptic vesicle glycoprotein 2C OS=Mus musculus GN=Sv2c PE=1 SV=2	Sv2c	16.1671	17.7306	17.8448	11.1864	11.1864	11.1864	17.045	17.2222	17.5032	6.23467	0.00787872	0.0133372
O88935	Synapsin-1 OS=Mus musculus GN=Syn1 PE=1 SV=2	Syn1	29.723	30.1453	29.7666	22.8239	26.088	23.586	29.0338	29.1031	28.9357	5.03125	0.0266942	0.0342602
Q64332	Synapsin-2 OS=Mus musculus GN=Syn2 PE=1 SV=2	Syn2	26.5339	25.6455	26.5255	18.6606	19.1948	18.5025	25.2362	25.3971	25.1672	7.47321	7.10194e-05	0.00123457
Q8JZP2	Synapsin-3 OS=Mus musculus GN=Syn3 PE=1 SV=2	Syn3	21.351	21.8407	21.0969	11.1864	11.1864	11.1864	20.5279	20.5551	20.446	10.2768	0.000453784	0.00237432
Q8R191	Synaptogyrin-3 OS=Mus musculus GN=Syngr3 PE=1 SV=1	Syngr3	25.8923	25.691	25.8289	17.263	17.3572	16.2033	24.7758	24.8964	24.8236	8.77956	0.00137755	0.00464027
Q8CHC4	Synaptojanin-1 OS=Mus musculus GN=Synj1 PE=1 SV=3	Synj1	20.5445	20.4181	20.7855	13.8383	13.9067	14.0774	19.4892	19.5009	19.49	6.64651	4.04604e-06	0.000376197
Q8CC35	Synaptopodin OS=Mus musculus GN=Synpo PE=1 SV=2	Synpo	23.1496	23.9168	23.2077	18.4182	18.5316	18.1901	22.3591	22.412	22.4497	5.08197	0.00067081	0.0030044
P46096	Synaptotagmin-1 OS=Mus musculus GN=Syt1 PE=1 SV=1	Syt1	24.3321	24.0691	24.3058	18.7274	19.2051	17.7928	22.7467	22.987	23.2149	5.55407	0.0040535	0.00878155
Q920N7	Synaptotagmin-12 OS=Mus musculus GN=Syt12 PE=1 SV=1	Syt12	17.3305	17.122	17.2501	11.1864	11.1864	11.1864	15.9662	16.8444	16.8987	6.05033	0.000100799	0.00130985
Q9R0N7	Synaptotagmin-7 OS=Mus musculus GN=Syt7 PE=1 SV=1	Syt7	16.8008	17.1331	17.4031	11.1864	11.1864	11.1864	12.6126	12.6126	12.6126	5.9467	0.000862831	0.00357557
Q9R1Q8	Transgelin-3 OS=Mus musculus GN=Tagln3 PE=1 SV=1	Tagln3	22.9579	22.6201	22.345	16.776	16.4135	16.5745	21.9691	22.0701	22.035	6.06717	4.72336e-05	0.0010637
A2A690	Protein TANC2 OS=Mus musculus GN=Tanc2 PE=1 SV=1	Tanc2	17.1656	18.471	18.4014	12.4882	11.1864	12.4707	16.7903	17.0104	16.7777	5.96091	0.000593287	0.00276869
P39447	Tight junction protein ZO-1 OS=Mus musculus GN=Tjp1 PE=1 SV=2	Tjp1	21.0542	20.8241	21.4757	15.1814	14.8532	16.7699	19.8231	19.9477	19.7852	5.28301	0.00675604	0.0120262
P83510	Traf2 and NCK-interacting protein kinase OS=Mus musculus GN=Tnik PE=1 SV=2	Tnik	17.6885	16.6629	18.3056	11.1864	11.1864	11.1864	16.3565	16.4484	17.9996	6.51408	0.00561613	0.0108032
O88746	Target of Myb protein 1 OS=Mus musculus GN=Tom1 PE=1 SV=1	Tom1	18.3238	17.66	18.4498	11.1864	11.1864	11.1864	16.9944	17.3509	16.2293	6.99737	0.00123723	0.00441956
Q5SRX1	TOM1-like protein 2 OS=Mus musculus GN=Tom1l2 PE=1 SV=1	Tom1l2	18.7858	15.8695	18.4477	11.1864	11.1864	11.1864	15.2999	16.0887	16.9422	6.95823	0.0194054	0.0263833
Q62393	Tumor protein D52 OS=Mus musculus GN=Tpd52 PE=1 SV=2	Tpd52	18.7681	19.1137	18.198	11.1864	11.1864	11.1864	18.2083	18.1077	18.2161	7.55462	0.00126244	0.00441956
Q9CYZ2	Tumor protein D54 OS=Mus musculus GN=Tpd52l2 PE=1 SV=1	Tpd52l2	21.457	20.7445	21.1395	15.0532	11.1864	13.6274	20.2196	20.0046	20.0202	7.14766	0.0175751	0.0246718
Q7TQD2	Tubulin polymerization-promoting protein OS=Mus musculus GN=Tppp PE=1 SV=1	Tppp	24.2329	25.1608	23.7589	19.4971	19.4251	19.2832	23.746	23.739	23.5847	5.10036	0.00583331	0.0109085
Q8C7M3	E3 ubiquitin-protein ligase TRIM9 OS=Mus musculus GN=Trim9 PE=1 SV=2	Trim9	17.5174	18.1746	17.8402	12.6641	11.1864	12.3879	16.997	17.1192	17.1866	5.66231	0.00223124	0.00611525
Q0KL02	Triple functional domain protein OS=Mus musculus GN=Trio PE=1 SV=3	Trio	17.1221	17.3233	17.4999	11.1864	11.1864	11.1864	12.6126	12.6126	12.6126	6.13692	0.000317018	0.00202736
P68368	Tubulin alpha-4A chain OS=Mus musculus GN=Tuba4a PE=1 SV=1	Tuba4a	18.3047	18.5362	18.7357	11.1864	11.1864	11.1864	16.9109	16.7933	16.6189	7.34983	0.000287748	0.00198739
Q7TMM9	Tubulin beta-2A chain OS=Mus musculus GN=Tubb2a PE=1 SV=1	Tubb2a	22.5627	21.992	22.3349	17.4511	16.9716	16.5066	20.8193	20.7631	20.9889	5.28768	0.000266105	0.00195979
Q9ERD7	Tubulin beta-3 chain OS=Mus musculus GN=Tubb3 PE=1 SV=1	Tubb3	18.2175	18.3683	18.5049	11.1864	11.1864	11.1864	19.057	19.2021	18.6897	7.18192	0.000133763	0.00143141
P61082	NEDD8-conjugating enzyme Ubc12 OS=Mus musculus GN=Ube2m PE=1 SV=1	Ube2m	19.1165	17.2324	19.1934	11.1864	11.1864	11.1864	17.3341	17.282	17.2808	7.56275	0.00757064	0.0129
P63044	Vesicle-associated membrane protein 2 OS=Mus musculus GN=Vamp2 PE=1 SV=2	Vamp2	21.4335	21.2446	20.4788	14.3359	13.6126	12.6588	20.5969	20.7903	20.5537	7.41661	0.000582906	0.00274498
Q3UVL4	Vacuolar protein sorting-associated protein 51 homolog OS=Mus musculus GN=Vps51 PE=1 SV=2	Vps51	17.829	17.5873	17.2969	11.1864	11.1864	11.1864	12.6126	12.6126	12.6126	6.40093	0.000579878	0.00274498
P62761	Visinin-like protein 1 OS=Mus musculus GN=Vsnl1 PE=1 SV=2	Vsnl1	19.498	15.7941	18.2943	11.1864	11.1864	11.1864	17.9991	18.7122	18.4692	7.32203	0.0256769	0.033335
Q6NVE8	WD repeat-containing protein 44 OS=Mus musculus GN=Wdr44 PE=1 SV=1	Wdr44	18.3174	17.8555	19.3315	11.1864	11.1864	11.1864	17.3161	17.2662	16.7866	7.45124	0.00353244	0.00802546
Q8CGF6	WD repeat-containing protein 47 OS=Mus musculus GN=Wdr47 PE=1 SV=2	Wdr47	15.7903	17.1884	17.8849	11.1864	11.1864	11.1864	16.2946	16.6907	15.5481	6.00196	0.0112079	0.0175398
Q920I9	WD repeat-containing protein 7 OS=Mus musculus GN=Wdr7 PE=1 SV=3	Wdr7	20.8211	21.3932	20.986	13.0088	13.8444	12.0721	20.2703	20.2754	20.0995	7.93788	0.00184771	0.00553916
P0C7L0	WAS/WASL-interacting protein family member 3 OS=Mus musculus GN=Wipf3 PE=1 SV=1	Wipf3	17.4964	18.8975	17.4342	14.1057	11.1864	11.1864	17.402	17.451	17.3776	5.25349	0.0138943	0.0206817
Q8BJH1	Zinc finger C2HC domain-containing protein 1A OS=Mus musculus GN=Zc2hc1a PE=1 SV=1	Zc2hc1a	20.2338	21.5165	20.3791	13.6785	14.1106	13.6984	20.0096	20.0514	19.9389	6.98785	0.00145482	0.00470998
Q62523	Zyxin OS=Mus musculus GN=Zyx PE=1 SV=2	Zyx	18.1931	18.0635	17.7655	11.1864	13.3338	11.1864	16.9317	16.8868	17.0445	5.73194	0.0115398	0.0179508

## Sheet: 2_Annotations
2 Annotations—Clustergram annotations for Synapsin-BioID2 enriched proteins.
Identified Protein Information			Clustergram Membership
UniProt ID	Description	Gene	Synaptic Vesicle	Active Zone	Endocytosis	Exocytosis	Unknown Function	Actin Cytoskeleton	Neurological Disease	Known Presynaptic
Q3UHJ0	AP2-associated protein kinase 1 OS=Mus musculus GN=Aak1 PE=1 SV=2	Aak1			YES					YES
P62484	Abl interactor 2 OS=Mus musculus GN=Abi2 PE=1 SV=1	Abi2						YES
Q4JIM5	Abelson tyrosine-protein kinase 2 OS=Mus musculus GN=Abl2 PE=1 SV=1	Abl2						YES
Q8K4G5	Actin-binding LIM protein 1 OS=Mus musculus GN=Ablim1 PE=1 SV=1	Ablim1						YES
Q69ZX8	Actin-binding LIM protein 3 OS=Mus musculus GN=Ablim3 PE=1 SV=2	Ablim3						YES
Q9QYC0	Alpha-adducin OS=Mus musculus GN=Add1 PE=1 SV=2	Add1						YES
Q9QZQ1	Afadin OS=Mus musculus GN=Afdn PE=1 SV=3	Afdn						YES
Q8K2K6	Arf-GAP domain and FG repeat-containing protein 1 OS=Mus musculus GN=Agfg1 PE=1 SV=2	Agfg1
Q7TQF7	Amphiphysin OS=Mus musculus GN=Amph PE=1 SV=1	Amph			YES			YES		YES
Q9DBG3	AP-2 complex subunit beta OS=Mus musculus GN=Ap2b1 PE=1 SV=1	Ap2b1			YES					YES
Q9JME5	AP-3 complex subunit beta-2 OS=Mus musculus GN=Ap3b2 PE=1 SV=2	Ap3b2							YES	YES
P98084	Amyloid beta A4 precursor protein-binding family A member 2 OS=Mus musculus GN=Apba2 PE=1 SV=2	Apba2				YES				YES
Q9QXJ1	Amyloid beta A4 precursor protein-binding family B member 1 OS=Mus musculus GN=Apbb1 PE=1 SV=3	Apbb1								YES
Q9EPJ9	ADP-ribosylation factor GTPase-activating protein 1 OS=Mus musculus GN=Arfgap1 PE=1 SV=2	Arfgap1								YES
Q9D8S3	ADP-ribosylation factor GTPase-activating protein 3 OS=Mus musculus GN=Arfgap3 PE=1 SV=2	Arfgap3
Q8K221	Arfaptin-2 OS=Mus musculus GN=Arfip2 PE=1 SV=2	Arfip2						YES
Q5FWK3	Rho GTPase-activating protein 1 OS=Mus musculus GN=Arhgap1 PE=1 SV=1	Arhgap1						YES
Q811P8	Rho GTPase-activating protein 32 OS=Mus musculus GN=Arhgap32 PE=1 SV=2	Arhgap32						YES	YES
Q5SSM3	Rho GTPase-activating protein 44 OS=Mus musculus GN=Arhgap44 PE=1 SV=1	Arhgap44						YES
Q61137	Astrotactin-1 OS=Mus musculus GN=Astn1 PE=1 SV=4	Astn1
P50516	V-type proton ATPase catalytic subunit A OS=Mus musculus GN=Atp6v1a PE=1 SV=2	Atp6v1a	YES						YES	YES
P62814	V-type proton ATPase subunit B, brain isoform OS=Mus musculus GN=Atp6v1b2 PE=1 SV=1	Atp6v1b2	YES						YES	YES
Q61140	Breast cancer anti-estrogen resistance protein 1 OS=Mus musculus GN=Bcar1 PE=1 SV=2	Bcar1
Q6PAJ1	Breakpoint cluster region protein OS=Mus musculus GN=Bcr PE=1 SV=3	Bcr						YES
O08539	Myc box-dependent-interacting protein 1 OS=Mus musculus GN=Bin1 PE=1 SV=1	Bin1			YES			YES		YES
P28028	Serine/threonine-protein kinase B-raf OS=Mus musculus GN=Braf PE=1 SV=3	Braf							YES
Q80Y55	BSD domain-containing protein 1 OS=Mus musculus GN=Bsdc1 PE=1 SV=1	Bsdc1					YES
O88737	Protein bassoon OS=Mus musculus GN=Bsn PE=1 SV=4	Bsn		YES						YES
Q80TJ1	Calcium-dependent secretion activator 1 OS=Mus musculus GN=Cadps PE=1 SV=3	Cadps				YES				YES
Q8BYR5	Calcium-dependent secretion activator 2 OS=Mus musculus GN=Cadps2 PE=1 SV=2	Cadps2				YES			YES	YES
P0DP28	Calmodulin-3 OS=Mus musculus GN=Calm3 PE=1 SV=1	Calm3
P28652	Calcium/calmodulin-dependent protein kinase type II subunit beta OS=Mus musculus GN=Camk2b PE=1 SV=2	Camk2b						YES	YES	YES
P47753	F-actin-capping protein subunit alpha-1 OS=Mus musculus GN=Capza1 PE=1 SV=4	Capza1						YES
Q6P9K8	Caskin-1 OS=Mus musculus GN=Caskin1 PE=1 SV=2	Caskin1								YES
O54901	OX-2 membrane glycoprotein OS=Mus musculus GN=Cd200 PE=1 SV=1	Cd200
Q4VAA2	Protein CDV3 OS=Mus musculus GN=Cdv3 PE=1 SV=2	Cdv3					YES
Q6A065	Centrosomal protein of 170 kDa OS=Mus musculus GN=Cep170 PE=1 SV=2	Cep170
P18760	Cofilin-1 OS=Mus musculus GN=Cfl1 PE=1 SV=3	Cfl1						YES		YES
Q99KN9	Clathrin interactor 1 OS=Mus musculus GN=Clint1 PE=1 SV=2	Clint1			YES				YES	YES
Q68FD5	Clathrin heavy chain 1 OS=Mus musculus GN=Cltc PE=1 SV=3	Cltc			YES				YES	YES
P84086	Complexin-2 OS=Mus musculus GN=Cplx2 PE=1 SV=1	Cplx2				YES				YES
Q9DCT8	Cysteine-rich protein 2 OS=Mus musculus GN=Crip2 PE=1 SV=1	Crip2
P47941	Crk-like protein OS=Mus musculus GN=Crkl PE=1 SV=2	Crkl
P97427	Dihydropyrimidinase-related protein 1 OS=Mus musculus GN=Crmp1 PE=1 SV=1	Crmp1
Q9JMK2	Casein kinase I isoform epsilon OS=Mus musculus GN=Csnk1e PE=1 SV=2	Csnk1e							YES
O88712	C-terminal-binding protein 1 OS=Mus musculus GN=Ctbp1 PE=1 SV=2	Ctbp1							YES	YES
Q61301	Catenin alpha-2 OS=Mus musculus GN=Ctnna2 PE=1 SV=3	Ctnna2						YES		YES
P30999	Catenin delta-1 OS=Mus musculus GN=Ctnnd1 PE=1 SV=2	Ctnnd1						YES
O35927	Catenin delta-2 OS=Mus musculus GN=Ctnnd2 PE=1 SV=1	Ctnnd2						YES	YES
Q60598	Src substrate cortactin OS=Mus musculus GN=Cttn PE=1 SV=2	Cttn						YES
B9EJA2	Cortactin-binding protein 2 OS=Mus musculus GN=Cttnbp2 PE=1 SV=2	Cttnbp2						YES	YES
P97792	Coxsackievirus and adenovirus receptor homolog OS=Mus musculus GN=Cxadr PE=1 SV=1	Cxadr
Q5SQX6	Cytoplasmic FMR1-interacting protein 2 OS=Mus musculus GN=Cyfip2 PE=1 SV=2	Cyfip2						YES
Q9QXS6	Drebrin OS=Mus musculus GN=Dbn1 PE=1 SV=4	Dbn1						YES
Q62418	Drebrin-like protein OS=Mus musculus GN=Dbnl PE=1 SV=2	Dbnl						YES
Q9WV69	Dematin OS=Mus musculus GN=Dmtn PE=1 SV=1	Dmtn						YES
Q8BPN8	DmX-like protein 2 OS=Mus musculus GN=Dmxl2 PE=1 SV=3	Dmxl2							YES	YES
Q80TZ3	Putative tyrosine-protein phosphatase auxilin OS=Mus musculus GN=Dnajc6 PE=1 SV=2	Dnajc6			YES				YES	YES
P39053	Dynamin-1 OS=Mus musculus GN=Dnm1 PE=1 SV=2	Dnm1			YES				YES	YES
O08553	Dihydropyrimidinase-related protein 2 OS=Mus musculus GN=Dpysl2 PE=1 SV=2	Dpysl2							YES	YES
Q61062	Segment polarity protein dishevelled homolog DVL-3 OS=Mus musculus GN=Dvl3 PE=1 SV=2	Dvl3
Q9D8Y0	EF-hand domain-containing protein D2 OS=Mus musculus GN=Efhd2 PE=1 SV=1	Efhd2						YES
Q8CHU3	Epsin-2 OS=Mus musculus GN=Epn2 PE=1 SV=1	Epn2			YES					YES
Q6PH08	ERC protein 2 OS=Mus musculus GN=Erc2 PE=1 SV=2	Erc2		YES						YES
Q3TY60	Protein FAM131B OS=Mus musculus GN=Fam131b PE=1 SV=1	Fam131b					YES
Q14CH0	Protein FAM171B OS=Mus musculus GN=Fam171b PE=1 SV=2	Fam171b					YES
O08917	Flotillin-1 OS=Mus musculus GN=Flot1 PE=1 SV=1	Flot1								YES
P48320	Glutamate decarboxylase 2 OS=Mus musculus GN=Gad2 PE=1 SV=1	Gad2								YES
Q99KY4	Cyclin-G-associated kinase OS=Mus musculus GN=Gak PE=1 SV=2	Gak			YES					YES
P06837	Neuromodulin OS=Mus musculus GN=Gap43 PE=1 SV=1	Gap43								YES
Q68FF6	ARF GTPase-activating protein GIT1 OS=Mus musculus GN=Git1 PE=1 SV=1	Git1						YES	YES	YES
Q8C419	Probable G-protein coupled receptor 158 OS=Mus musculus GN=Gpr158 PE=1 SV=2	Gpr158
Q2NL51	Glycogen synthase kinase-3 alpha OS=Mus musculus GN=Gsk3a PE=1 SV=2	Gsk3a								YES
Q9WV60	Glycogen synthase kinase-3 beta OS=Mus musculus GN=Gsk3b PE=1 SV=2	Gsk3b								YES
Q9CX00	IST1 homolog OS=Mus musculus GN=Ist1 PE=1 SV=1	Ist1								YES
Q9Z0R4	Intersectin-1 OS=Mus musculus GN=Itsn1 PE=1 SV=2	Itsn1			YES			YES		YES
Q9Z0R6	Intersectin-2 OS=Mus musculus GN=Itsn2 PE=1 SV=2	Itsn2			YES			YES		YES
Q5DTX6	Junctional protein associated with coronary artery disease OS=Mus musculus GN=Jcad PE=1 SV=2	Jcad
Q80TK0	Uncharacterized protein KIAA1107 OS=Mus musculus GN=Kiaa1107 PE=1 SV=5	Kiaa1107			YES					YES
P28740	Kinesin-like protein KIF2A OS=Mus musculus GN=Kif2a PE=1 SV=2	Kif2a							YES	YES
P28738	Kinesin heavy chain isoform 5C OS=Mus musculus GN=Kif5c PE=1 SV=3	Kif5c							YES	YES
Q61792	LIM and SH3 domain protein 1 OS=Mus musculus GN=Lasp1 PE=1 SV=1	Lasp1						YES
Q80U28	MAP kinase-activating death domain protein OS=Mus musculus GN=Madd PE=1 SV=2	Madd								YES
Q6RHR9	Membrane-associated guanylate kinase, WW and PDZ domain-containing protein 1 OS=Mus musculus GN=Magi1 PE=1 SV=1	Magi1
Q9WVQ1	Membrane-associated guanylate kinase, WW and PDZ domain-containing protein 2 OS=Mus musculus GN=Magi2 PE=1 SV=2	Magi2
Q62073	Mitogen-activated protein kinase kinase kinase 7 OS=Mus musculus GN=Map3k7 PE=1 SV=1	Map3k7
Q61161	Mitogen-activated protein kinase kinase kinase kinase 2 OS=Mus musculus GN=Map4k2 PE=1 SV=1	Map4k2
P10637	Microtubule-associated protein tau OS=Mus musculus GN=Mapt PE=1 SV=3	Mapt							YES	YES
Q9CWZ7	Gamma-soluble NSF attachment protein OS=Mus musculus GN=Napg PE=1 SV=1	Napg				YES				YES
Q8CH77	Neuron navigator 1 OS=Mus musculus GN=Nav1 PE=1 SV=2	Nav1
Q9EPN1	Neurobeachin OS=Mus musculus GN=Nbea PE=1 SV=1	Nbea							YES
P13595	Neural cell adhesion molecule 1 OS=Mus musculus GN=Ncam1 PE=1 SV=3	Ncam1								YES
Q9DC07	LIM zinc-binding domain-containing Nebulette OS=Mus musculus GN=Nebl PE=1 SV=1	Nebl						YES
P46460	Vesicle-fusing ATPase OS=Mus musculus GN=Nsf PE=1 SV=2	Nsf				YES				YES
O08919	Numb-like protein OS=Mus musculus GN=Numbl PE=1 SV=3	Numbl								YES
Q6P5U7	NACHT and WD repeat domain-containing protein 2 OS=Mus musculus GN=Nwd2 PE=1 SV=2	Nwd2					YES
Q8BM65	Neuronal tyrosine-phosphorylated phosphoinositide-3-kinase adapter 2 OS=Mus musculus GN=Nyap2 PE=1 SV=1	Nyap2						YES
Q6NVF0	Inositol polyphosphate 5-phosphatase OCRL-1 OS=Mus musculus GN=Ocrl PE=1 SV=1	Ocrl						YES	YES
Q61644	Protein kinase C and casein kinase substrate in neurons protein 1 OS=Mus musculus GN=Pacsin1 PE=1 SV=1	Pacsin1						YES		YES
O88643	Serine/threonine-protein kinase PAK 1 OS=Mus musculus GN=Pak1 PE=1 SV=1	Pak1						YES
Q9JHU2	Palmdelphin OS=Mus musculus GN=Palmd PE=1 SV=1	Palmd
Q3UHX2	28 kDa heat- and acid-stable phosphoprotein OS=Mus musculus GN=Pdap1 PE=1 SV=1	Pdap1
Q9DBX2	Phosducin-like protein OS=Mus musculus GN=Pdcl PE=1 SV=1	Pdcl
Q2M3X8	Phosphatase and actin regulator 1 OS=Mus musculus GN=Phactr1 PE=1 SV=1	Phactr1						YES
Q7M6Y3	Phosphatidylinositol-binding clathrin assembly protein OS=Mus musculus GN=Picalm PE=1 SV=1	Picalm			YES					YES
Q62083	PRKCA-binding protein OS=Mus musculus GN=Pick1 PE=1 SV=2	Pick1						YES		YES
O35954	Membrane-associated phosphatidylinositol transfer protein 1 OS=Mus musculus GN=Pitpnm1 PE=1 SV=1	Pitpnm1						YES
Q9QXS1	Plectin OS=Mus musculus GN=Plec PE=1 SV=3	Plec
Q7TME0	Phospholipid phosphatase-related protein type 4 OS=Mus musculus GN=Plppr4 PE=1 SV=2	Plppr4								YES
Q8BSS9	Liprin-alpha-2 OS=Mus musculus GN=Ppfia2 PE=1 SV=2	Ppfia2		YES						YES
P60469	Liprin-alpha-3 OS=Mus musculus GN=Ppfia3 PE=1 SV=2	Ppfia3		YES						YES
P49443	Protein phosphatase 1A OS=Mus musculus GN=Ppm1a PE=1 SV=1	Ppm1a								YES
P62137	Serine/threonine-protein phosphatase PP1-alpha catalytic subunit OS=Mus musculus GN=Ppp1ca PE=1 SV=1	Ppp1ca								YES
Q9DCL8	Protein phosphatase inhibitor 2 OS=Mus musculus GN=Ppp1r2 PE=1 SV=3	Ppp1r2
Q6R891	Neurabin-2 OS=Mus musculus GN=Ppp1r9b PE=1 SV=1	Ppp1r9b						YES
P63328	Serine/threonine-protein phosphatase 2B catalytic subunit alpha isoform OS=Mus musculus GN=Ppp3ca PE=1 SV=1	Ppp3ca							YES	YES
Q7TSI3	Serine/threonine-protein phosphatase 6 regulatory subunit 1 OS=Mus musculus GN=Ppp6r1 PE=1 SV=1	Ppp6r1
E9PUL5	Proline-rich transmembrane protein 2 OS=Mus musculus GN=Prrt2 PE=1 SV=1	Prrt2				YES			YES	YES
Q8BIW1	Exopolyphosphatase PRUNE1 OS=Mus musculus GN=Prune1 PE=1 SV=1	Prune1							YES
Q52KR3	Protein prune homolog 2 OS=Mus musculus GN=Prune2 PE=1 SV=2	Prune2							YES
Q9QVP9	Protein-tyrosine kinase 2-beta OS=Mus musculus GN=Ptk2b PE=1 SV=2	Ptk2b
Q99P58	Ras-related protein Rab-27B OS=Mus musculus GN=Rab27b PE=1 SV=3	Rab27b	YES			YES				YES
P63011	Ras-related protein Rab-3A OS=Mus musculus GN=Rab3a PE=1 SV=1	Rab3a	YES			YES				YES
P62823	Ras-related protein Rab-3C OS=Mus musculus GN=Rab3c PE=1 SV=1	Rab3c	YES			YES				YES
P63001	Ras-related C3 botulinum toxin substrate 1 OS=Mus musculus GN=Rac1 PE=1 SV=1	Rac1						YES	YES
Q5SVL6	Rap1 GTPase-activating protein 2 OS=Mus musculus GN=Rap1gap2 PE=1 SV=1	Rap1gap2				YES
Q9Z268	RasGAP-activating-like protein 1 OS=Mus musculus GN=Rasal1 PE=1 SV=2	Rasal1
Q80U40	RIMS-binding protein 2 OS=Mus musculus GN=Rimbp2 PE=1 SV=3	Rimbp2		YES						YES
Q3TDK6	Protein rogdi homolog OS=Mus musculus GN=Rogdi PE=1 SV=2	Rogdi					YES		YES
P47708	Rabphilin-3A OS=Mus musculus GN=Rph3a PE=1 SV=2	Rph3a				YES				YES
Q9D394	Protein RUFY3 OS=Mus musculus GN=Rufy3 PE=1 SV=1	Rufy3						YES		YES
Q8K021	Secretory carrier-associated membrane protein 1 OS=Mus musculus GN=Scamp1 PE=1 SV=1	Scamp1	YES							YES
Q9CZC8	Secernin-1 OS=Mus musculus GN=Scrn1 PE=1 SV=1	Scrn1				YES				YES
Q9Z1S5	Neuronal-specific septin-3 OS=Mus musculus GN=Sept3 PE=1 SV=2	Sept3								YES
Q9Z2Q6	Septin-5 OS=Mus musculus GN=Sept5 PE=1 SV=2	Sept5								YES
Q80UG5	Septin-9 OS=Mus musculus GN=Sept9 PE=1 SV=1	Sept9								YES
Q62419	Endophilin-A2 OS=Mus musculus GN=Sh3gl1 PE=1 SV=1	Sh3gl1			YES					YES
Q62420	Endophilin-A1 OS=Mus musculus GN=Sh3gl2 PE=1 SV=2	Sh3gl2			YES					YES
Q62421	Endophilin-A3 OS=Mus musculus GN=Sh3gl3 PE=1 SV=1	Sh3gl3			YES					YES
Q8R3V5	Endophilin-B2 OS=Mus musculus GN=Sh3glb2 PE=1 SV=2	Sh3glb2			YES					YES
D3YZU1	SH3 and multiple ankyrin repeat domains protein 1 OS=Mus musculus GN=Shank1 PE=1 SV=1	Shank1							YES
A2ALU4	Protein Shroom2 OS=Mus musculus GN=Shroom2 PE=1 SV=1	Shroom2						YES
Q8C0T5	Signal-induced proliferation-associated 1-like protein 1 OS=Mus musculus GN=Sipa1l1 PE=1 SV=2	Sipa1l1						YES
P97797	Tyrosine-protein phosphatase non-receptor type substrate 1 OS=Mus musculus GN=Sirpa PE=1 SV=1	Sirpa								YES
A2AQ25	Sickle tail protein OS=Mus musculus GN=Skt PE=1 SV=1	Skt					YES
Q8BLE7	Vesicular glutamate transporter 2 OS=Mus musculus GN=Slc17a6 PE=1 SV=1	Slc17a6	YES							YES
P43006	Excitatory amino acid transporter 2 OS=Mus musculus GN=Slc1a2 PE=1 SV=1	Slc1a2							YES	YES
O35633	Vesicular inhibitory amino acid transporter OS=Mus musculus GN=Slc32a1 PE=1 SV=3	Slc32a1	YES							YES
Q8BJI1	Sodium-dependent neutral amino acid transporter SLC6A17 OS=Mus musculus GN=Slc6a17 PE=1 SV=1	Slc6a17							YES	YES
Q91VZ6	Stromal membrane-associated protein 1 OS=Mus musculus GN=Smap1 PE=1 SV=1	Smap1			YES					YES
Q7TN29	Stromal membrane-associated protein 2 OS=Mus musculus GN=Smap2 PE=1 SV=1	Smap2
P60879	Synaptosomal-associated protein 25 OS=Mus musculus GN=Snap25 PE=1 SV=1	Snap25				YES			YES	YES
Q8R570	Synaptosomal-associated protein 47 OS=Mus musculus GN=Snap47 PE=1 SV=1	Snap47				YES				YES
O55042	Alpha-synuclein OS=Mus musculus GN=Snca PE=1 SV=2	Snca							YES	YES
Q9WV80	Sorting nexin-1 OS=Mus musculus GN=Snx1 PE=1 SV=1	Snx1								YES
Q8CE50	Sorting nexin-30 OS=Mus musculus GN=Snx30 PE=1 SV=1	Snx30
Q9CY18	Sorting nexin-7 OS=Mus musculus GN=Snx7 PE=1 SV=1	Snx7
Q62417	Sorbin and SH3 domain-containing protein 1 OS=Mus musculus GN=Sorbs1 PE=1 SV=2	Sorbs1						YES
Q3UTJ2	Sorbin and SH3 domain-containing protein 2 OS=Mus musculus GN=Sorbs2 PE=1 SV=2	Sorbs2						YES
O55106	Striatin OS=Mus musculus GN=Strn PE=1 SV=2	Strn
P58404	Striatin-4 OS=Mus musculus GN=Strn4 PE=1 SV=2	Strn4
O35526	Syntaxin-1A OS=Mus musculus GN=Stx1a PE=1 SV=3	Stx1a		YES		YES			YES	YES
O08599	Syntaxin-binding protein 1 OS=Mus musculus GN=Stxbp1 PE=1 SV=2	Stxbp1		YES		YES			YES	YES
Q5DQR4	Syntaxin-binding protein 5-like OS=Mus musculus GN=Stxbp5l PE=1 SV=1	Stxbp5l		YES		YES				YES
Q9JIS5	Synaptic vesicle glycoprotein 2A OS=Mus musculus GN=Sv2a PE=1 SV=1	Sv2a	YES			YES				YES
Q8BG39	Synaptic vesicle glycoprotein 2B OS=Mus musculus GN=Sv2b PE=1 SV=1	Sv2b	YES			YES				YES
Q69ZS6	Synaptic vesicle glycoprotein 2C OS=Mus musculus GN=Sv2c PE=1 SV=2	Sv2c	YES			YES				YES
O88935	Synapsin-1 OS=Mus musculus GN=Syn1 PE=1 SV=2	Syn1	YES					YES	YES	YES
Q64332	Synapsin-2 OS=Mus musculus GN=Syn2 PE=1 SV=2	Syn2	YES					YES	YES	YES
Q8JZP2	Synapsin-3 OS=Mus musculus GN=Syn3 PE=1 SV=2	Syn3	YES					YES	YES	YES
Q8R191	Synaptogyrin-3 OS=Mus musculus GN=Syngr3 PE=1 SV=1	Syngr3	YES			YES				YES
Q8CHC4	Synaptojanin-1 OS=Mus musculus GN=Synj1 PE=1 SV=3	Synj1			YES				YES	YES
Q8CC35	Synaptopodin OS=Mus musculus GN=Synpo PE=1 SV=2	Synpo						YES
P46096	Synaptotagmin-1 OS=Mus musculus GN=Syt1 PE=1 SV=1	Syt1	YES			YES			YES	YES
Q920N7	Synaptotagmin-12 OS=Mus musculus GN=Syt12 PE=1 SV=1	Syt12	YES			YES				YES
Q9R0N7	Synaptotagmin-7 OS=Mus musculus GN=Syt7 PE=1 SV=1	Syt7	YES			YES				YES
Q9R1Q8	Transgelin-3 OS=Mus musculus GN=Tagln3 PE=1 SV=1	Tagln3						YES
A2A690	Protein TANC2 OS=Mus musculus GN=Tanc2 PE=1 SV=1	Tanc2							YES
P39447	Tight junction protein ZO-1 OS=Mus musculus GN=Tjp1 PE=1 SV=2	Tjp1
P83510	Traf2 and NCK-interacting protein kinase OS=Mus musculus GN=Tnik PE=1 SV=2	Tnik						YES	YES
O88746	Target of Myb protein 1 OS=Mus musculus GN=Tom1 PE=1 SV=1	Tom1			YES					YES
Q5SRX1	TOM1-like protein 2 OS=Mus musculus GN=Tom1l2 PE=1 SV=1	Tom1l2			YES					YES
Q62393	Tumor protein D52 OS=Mus musculus GN=Tpd52 PE=1 SV=2	Tpd52				YES				YES
Q9CYZ2	Tumor protein D54 OS=Mus musculus GN=Tpd52l2 PE=1 SV=1	Tpd52l2				YES				YES
Q7TQD2	Tubulin polymerization-promoting protein OS=Mus musculus GN=Tppp PE=1 SV=1	Tppp								YES
Q8C7M3	E3 ubiquitin-protein ligase TRIM9 OS=Mus musculus GN=Trim9 PE=1 SV=2	Trim9
Q0KL02	Triple functional domain protein OS=Mus musculus GN=Trio PE=1 SV=3	Trio						YES	YES
P68368	Tubulin alpha-4A chain OS=Mus musculus GN=Tuba4a PE=1 SV=1	Tuba4a							YES	YES
Q7TMM9	Tubulin beta-2A chain OS=Mus musculus GN=Tubb2a PE=1 SV=1	Tubb2a								YES
Q9ERD7	Tubulin beta-3 chain OS=Mus musculus GN=Tubb3 PE=1 SV=1	Tubb3							YES	YES
P61082	NEDD8-conjugating enzyme Ubc12 OS=Mus musculus GN=Ube2m PE=1 SV=1	Ube2m
P63044	Vesicle-associated membrane protein 2 OS=Mus musculus GN=Vamp2 PE=1 SV=2	Vamp2	YES			YES				YES
Q3UVL4	Vacuolar protein sorting-associated protein 51 homolog OS=Mus musculus GN=Vps51 PE=1 SV=2	Vps51
P62761	Visinin-like protein 1 OS=Mus musculus GN=Vsnl1 PE=1 SV=2	Vsnl1								YES
Q6NVE8	WD repeat-containing protein 44 OS=Mus musculus GN=Wdr44 PE=1 SV=1	Wdr44								YES
Q8CGF6	WD repeat-containing protein 47 OS=Mus musculus GN=Wdr47 PE=1 SV=2	Wdr47								YES
Q920I9	WD repeat-containing protein 7 OS=Mus musculus GN=Wdr7 PE=1 SV=3	Wdr7								YES
P0C7L0	WAS/WASL-interacting protein family member 3 OS=Mus musculus GN=Wipf3 PE=1 SV=1	Wipf3						YES
Q8BJH1	Zinc finger C2HC domain-containing protein 1A OS=Mus musculus GN=Zc2hc1a PE=1 SV=1	Zc2hc1a					YES
Q62523	Zyxin OS=Mus musculus GN=Zyx PE=1 SV=2	Zyx						YES

## Sheet: 3_Edges
3 Edges—Protein-protein interactions in Synapsin iBioID network.
Protein A	Protein B
Aak1	Ap2b1
Aak1	Dvl3
Aak1	Plec
Abl2	Abi2
Abl2	Bcr
Abl2	Sorbs2
Ablim3	Abi2
Ablim3	Palmd
Add1	Calm3
Afdn	Magi1
Afdn	Sipa1l1
Afdn	Sorbs1
Agfg1	Nyap2
Amph	Ap2b1
Amph	Cltc
Amph	Dnm1
Amph	Itsn1
Amph	Sh3gl2
Amph	Syn1
Ap2b1	Cltc
Ap3b2	Cltc
Apba2	Stxbp1
Apbb1	Cyfip2
Arfgap1	Ap2b1
Arfgap1	Arfgap3
Arfgap3	Plec
Arfip2	Scamp1
Arhgap32	Abi2
Arhgap32	Bcar1
Arhgap32	Crkl
Arhgap32	Rac1
Arhgap32	Tnik
Atp6v1a	Amph
Atp6v1a	Ap3b2
Atp6v1a	Atp6v1b2
Atp6v1a	Bin1
Atp6v1a	Cyfip2
Atp6v1a	Dmxl2
Atp6v1a	Dnajc6
Atp6v1a	Dnm1
Atp6v1a	Flot1
Atp6v1a	Ist1
Atp6v1a	Itsn1
Atp6v1a	Nsf
Atp6v1a	Stxbp5l
Atp6v1a	Syngr3
Atp6v1a	Synj1
Bcar1	Afdn
Bcar1	Crip2
Bcar1	Cttn
Bcar1	Gak
Bcar1	Ocrl
Bcar1	Shroom2
Bcar1	Synj1
Bcar1	Tjp1
Bcr	Afdn
Bin1	Amph
Bin1	Cltc
Bin1	Dnm1
Bin1	Mapt
Bin1	Syn1
Braf	Ap2b1
Braf	Ppp1ca
Braf	Rap1gap2
Bsn	Dnm1
Bsn	Erc2
Bsn	Rab3a
Cadps	Snap25
Cadps	Stx1a
Cadps	Vamp2
Calm3	Camk2b
Calm3	Ppp3ca
Calm3	Snca
Calm3	Strn
Calm3	Strn4
Capza1	Ocrl
Caskin1	Snca
Cep170	Agfg1
Cep170	Lasp1
Cep170	Nebl
Cep170	Ocrl
Cep170	Zc2hc1a
Clint1	Ap2b1
Clint1	Cltc
Clint1	Dnm1
Cltc	Aak1
Cltc	Atp6v1b2
Cltc	Csnk1e
Cltc	Ist1
Cltc	Sorbs2
Cltc	Stx1a
Cplx2	Snap25
Cplx2	Stx1a
Cplx2	Vamp2
Crkl	Abl2
Crkl	Bcar1
Crkl	Bcr
Crkl	Sorbs1
Crkl	Sorbs2
Csnk1e	Dvl3
Ctnnd1	Csnk1e
Ctnnd1	Gsk3b
Ctnnd2	Cttn
Ctnnd2	Gsk3b
Cttn	Abl2
Cttn	Ctnnd1
Cttn	Pak1
Cttnbp2	Cttn
Cyfip2	Abi2
Cyfip2	Camk2b
Cyfip2	Caskin1
Cyfip2	Cttnbp2
Cyfip2	Dnm1
Cyfip2	Shank1
Cyfip2	Skt
Cyfip2	Tnik
Dbn1	Ablim1
Dbn1	Afdn
Dbn1	Ap2b1
Dbn1	Atp6v1a
Dbn1	Cfl1
Dbn1	Clint1
Dbn1	Cltc
Dbn1	Cttn
Dbn1	Flot1
Dbn1	Palmd
Dbn1	Picalm
Dbn1	Ppp1r9b
Dbn1	Sorbs2
Dbn1	Synpo
Dbnl	Shank1
Dmxl2	Cyfip2
Dmxl2	Rab3a
Dnajc6	Cltc
Dnm1	Cltc
Dnm1	Cttn
Dpysl2	Crmp1
Dpysl2	Ppp1ca
Efhd2	Mapt
Epn2	Cltc
Erc2	Git1
Flot1	Sorbs2
Gad2	Scamp1
Gad2	Tpd52
Gak	Aak1
Gak	Ap2b1
Gak	Clint1
Gak	Cltc
Gak	Dbn1
Gak	Synpo
Git1	Pak1
Git1	Sv2a
Gsk3a	Ctnnd1
Gsk3a	Mapt
Gsk3a	Ppp1r2
Gsk3b	Dpysl2
Gsk3b	Map3k7
Gsk3b	Ppp3ca
Gsk3b	Ppp6r1
Gsk3b	Prune1
Gsk3b	Snca
Itsn1	Agfg1
Itsn1	Ap2b1
Itsn1	Arfip2
Itsn1	Cltc
Itsn1	Dnm1
Itsn1	Epn2
Itsn1	Itsn2
Itsn1	Picalm
Itsn1	Ppfia2
Itsn1	Synj1
Itsn2	Amph
Itsn2	Sh3gl1
Itsn2	Syn1
Kiaa1107	Numbl
Kif2a	Dnm1
Kif2a	Tnik
Lasp1	Dnm1
Lasp1	Zc2hc1a
Magi1	Nav1
Magi1	Synpo
Magi2	Ctnnd2
Map3k7	Cltc
Mapt	Gsk3b
Mapt	Snca
Napg	Nsf
Ncam1	Ppp1r9b
Nebl	Zyx
Nsf	Stx1a
Ocrl	Ap2b1
Ocrl	Cfl1
Ocrl	Clint1
Ocrl	Cltc
Ocrl	Dbn1
Ocrl	Erc2
Ocrl	Flot1
Ocrl	Gak
Ocrl	Nsf
Ocrl	Picalm
Ocrl	Plec
Ocrl	Sorbs2
Ocrl	Synpo
Pacsin1	Cyfip2
Pacsin1	Dnm1
Pacsin1	Mapt
Pacsin1	Synj1
Pak1	Syn1
Phactr1	Ppp1ca
Picalm	Ap2b1
Picalm	Clint1
Picalm	Cltc
Picalm	Gak
Pick1	Afdn
Pick1	Sh3glb2
Plec	Dvl3
Ppfia2	Erc2
Ppfia2	Git1
Ppfia3	Erc2
Ppfia3	Git1
Ppfia3	Ppfia2
Ppm1a	Dvl3
Ppp1r2	Gsk3b
Ppp1r9b	Ppp1r2
Ppp3ca	Amph
Ppp3ca	Lasp1
Ppp6r1	Sh3gl2
Prrt2	Snap25
Prrt2	Stx1a
Prrt2	Syt1
Ptk2b	Bcar1
Ptk2b	Dnm1
Ptk2b	Git1
Ptk2b	Mapt
Ptk2b	Pitpnm1
Ptk2b	Snca
Ptk2b	Sorbs2
Rab3a	Nsf
Rab3a	Ocrl
Rab3a	Snca
Rab3c	Rab3a
Rac1	Abi2
Rac1	Arfip2
Rac1	Arhgap1
Rac1	Arhgap32
Rac1	Arhgap44
Rac1	Bcr
Rac1	Cltc
Rac1	Git1
Rac1	Magi1
Rac1	Ocrl
Rac1	Pak1
Rac1	Sorbs2
Rac1	Tnik
Rac1	Tom1
Rac1	Trio
Rogdi	Dmxl2
Rogdi	Wdr7
Rph3a	Rab27b
Rph3a	Rab3a
Rph3a	Rab3c
Rufy3	Pak1
Scamp1	Itsn1
Sept3	Lasp1
Sept3	Sept5
Sept3	Sept9
Sept3	Sept9
Sept5	Sept9
Sh3gl1	Arhgap1
Sh3gl1	Dnm1
Sh3gl1	Sh3gl2
Sh3gl1	Synj1
Sh3gl2	Bin1
Sh3gl2	Dnm1
Sh3gl2	Itsn1
Sh3gl2	Syn1
Sh3gl3	Amph
Sh3gl3	Bin1
Sh3gl3	Dnm1
Sh3gl3	Syn1
Sh3gl3	Synj1
Sipa1l1	Magi1
Sipa1l1	Nav1
Skt	Abi2
Slc1a2	Mapt
Smap2	Cep170
Smap2	Ocrl
Smap2	Smap1
Snap25	Ap2b1
Snap25	Cltc
Snap25	Dnm1
Snap25	Itsn1
Snap25	Kif5c
Snap25	Scamp1
Snap25	Snca
Snap25	Stx1a
Snap25	Syt1
Snap25	Trim9
Snap25	Vamp2
Snca	Cltc
Snca	Ctnnd1
Snca	Dmtn
Snca	Syn1
Snx1	Arfip2
Snx7	Abi2
Sorbs1	Flot1
Sorbs2	Afdn
Sorbs2	Pak1
Sorbs2	Synj1
Strn	Cttnbp2
Strn	Tjp1
Strn4	Tnik
Stx1a	Cplx2
Stx1a	Snap47
Stx1a	Snca
Stxbp1	Mapt
Stxbp1	Stx1a
Stxbp1	Tubb2a
Sv2b	Syt1
Syn1	Dnm1
Syn2	Syn1
Syn3	Syn1
Syn3	Syn2
Synj1	Amph
Synj1	Bin1
Synj1	Cltc
Synj1	Ppp3ca
Synj1	Sh3gl2
Synpo	Ablim1
Synpo	Cfl1
Synpo	Clint1
Synpo	Cltc
Synpo	Cttn
Synpo	Flot1
Synpo	Plec
Synpo	Ppp1r9b
Synpo	Sipa1l1
Synpo	Sorbs2
Syt1	Stx1a
Syt1	Sv2c
Syt7	Stx1a
Tanc2	Sipa1l1
Tjp1	Afdn
Tjp1	Cttn
Tjp1	Plec
Tnik	Abi2
Tnik	Ablim1
Tnik	Ap2b1
Tnik	Bcr
Tnik	Bin1
Tnik	Camk2b
Tnik	Cep170
Tnik	Ctbp1
Tnik	Ctnna2
Tnik	Ctnnd1
Tnik	Ctnnd2
Tnik	Cttnbp2
Tnik	Dnm1
Tnik	Dpysl2
Tnik	Erc2
Tnik	Git1
Tnik	Gsk3b
Tnik	Kif5c
Tnik	Magi2
Tnik	Map3k7
Tnik	Nbea
Tnik	Nsf
Tnik	Rimbp2
Tnik	Sept3
Tnik	Sh3gl2
Tnik	Shank1
Tnik	Sipa1l1
Tnik	Skt
Tnik	Sorbs2
Tnik	Strn
Tnik	Tanc2
Tnik	Tjp1
Tnik	Tubb2a
Tom1	Cltc
Tom1l2	Cltc
Tpd52l2	Tpd52
Tppp	Gsk3b
Tppp	Snca
Trio	Itsn2
Trio	Tnik
Tuba4a	Arhgap1
Tuba4a	Bcar1
Tuba4a	Mapt
Tuba4a	Rac1
Tuba4a	Snap25
Tuba4a	Stxbp1
Tubb3	Ctnnd1
Tubb3	Mapt
Tubb3	Plec
Tubb3	Ppp1ca
Vamp2	Dnm1
Vamp2	Snca
Vamp2	Stx1a
Vamp2	Syt1
Vps51	Gsk3b
Wdr7	Dmxl2
Zyx	Bcar1
Zyx	Lasp1

## Sheet: 4_Raw Protein
4 Raw Protein—Raw data and corresponding protein information.
Identified Protein Information				Peptide Intensity for Each Sample
UniProt ID	Description	Gene	# Peptides	Synapsin 1	Synapsin 2	Synapsin 3	Control 1	Control 2	Control 3	QC Pool 1	QC Pool 2	QC Pool 3
Q3UHJ0	AP2-associated protein kinase 1 OS=Mus musculus GN=Aak1 PE=1 SV=2	Aak1	37	7.55545e+07	1.8015e+07	1.19259e+08	795368	273914	621120	1.63967e+07	1.67044e+07	1.5922e+07
Q8CBW3	Abl interactor 1 OS=Mus musculus GN=Abi1 PE=1 SV=3	Abi1	4	395303	12224	1.08157e+06	50994.9				63695.2	97467.9
P62484	Abl interactor 2 OS=Mus musculus GN=Abi2 PE=1 SV=1	Abi2	5	3.15639e+06	362434	8.84389e+06				276800	318726	247700
Q4JIM5	Abelson tyrosine-protein kinase 2 OS=Mus musculus GN=Abl2 PE=1 SV=1	Abl2	2	151395	5658.48	328881				19254.4	12803.7	14202.6
Q8K4G5	Actin-binding LIM protein 1 OS=Mus musculus GN=Ablim1 PE=1 SV=1	Ablim1	5	1.16617e+06	83103.7	1.14324e+06				230996	203850	199761
Q8BL65	Actin-binding LIM protein 2 OS=Mus musculus GN=Ablim2 PE=1 SV=1	Ablim2	3	345685	4643.69	668500						7727.53
Q69ZX8	Actin-binding LIM protein 3 OS=Mus musculus GN=Ablim3 PE=1 SV=2	Ablim3	17	4.38662e+06	819365	8.0419e+06	26915.9	11309.1	55660.7	1.02949e+06	1.02636e+06	1.24045e+06
P62737	Actin, aortic smooth muscle OS=Mus musculus GN=Acta2 PE=1 SV=1	Acta2	1						80038.9
P60710	Actin, cytoplasmic 1 OS=Mus musculus GN=Actb PE=1 SV=1	Actb	4	1.55116e+07	2.98476e+06	1.8388e+07	3.12255e+06	868503	3.02236e+06	4.59966e+06	4.72644e+06	4.7768e+06
Q9QYC0	Alpha-adducin OS=Mus musculus GN=Add1 PE=1 SV=2	Add1	3	220449	44833.8	608108				69505.3	67303.4	64587.8
Q9QYB8	Beta-adducin OS=Mus musculus GN=Add2 PE=1 SV=4	Add2	2	103098	25030.2	223723		4645.43		44164.5	39687.9	45443.9
Q80ZF8	Adhesion G protein-coupled receptor B3 OS=Mus musculus GN=Adgrb3 PE=1 SV=2	Adgrb3	7	930001	112347	1.96339e+06	17759.1	2726.77		210783	153749	124867
P00330	Alcohol dehydrogenase 1 OS=Saccharomyces cerevisiae (strain ATCC 204508 / S288c) GN=ADH1 PE=1 SV=5	ADH1	15	5.09978e+08	2.81518e+08	5.73251e+08	2.48119e+08	3.2312e+08	2.92294e+08	2.92157e+08	2.92255e+08	2.79401e+08
P00331	Alcohol dehydrogenase 2 OS=Saccharomyces cerevisiae (strain ATCC 204508 / S288c) GN=ADH2 PE=1 SV=3	ADH2	1	8.92037e+06	686621	1.54952e+06	516196	978865	721632	793631	601774	323718
Q9QZQ1	Afadin OS=Mus musculus GN=Afdn PE=1 SV=3	Afdn	8	867057	340372	1.72945e+06	12055.7	5193.19		371763	328213	356972
Q80WT5	Aftiphilin OS=Mus musculus GN=Aftph PE=1 SV=2	Aftph	2	124101	18232.5	180219				36774.9	33717	33489
Q8K2K6	Arf-GAP domain and FG repeat-containing protein 1 OS=Mus musculus GN=Agfg1 PE=1 SV=2	Agfg1	4	1.99568e+06	523468	3.68368e+06	40847.8	10613.3	27969.2	576881	579617	564076
Q80WC7	Arf-GAP domain and FG repeat-containing protein 2 OS=Mus musculus GN=Agfg2 PE=1 SV=1	Agfg2	2	92486.5		217405
Q68FL4	Putative adenosylhomocysteinase 3 OS=Mus musculus GN=Ahcyl2 PE=1 SV=1	Ahcyl2	2	53522.8		219422
Q8BK64	Activator of 90 kDa heat shock protein ATPase homolog 1 OS=Mus musculus GN=Ahsa1 PE=1 SV=2	Ahsa1	5	1.04594e+06	141844	2.01806e+06	14070.2	6065.73	10488.2	199469	225243	201008
O08715	A-kinase anchor protein 1, mitochondrial OS=Mus musculus GN=Akap1 PE=1 SV=4	Akap1	2	201496	25499	264214	9654.79			34529.6	29896.8	33901.8
O88845	A-kinase anchor protein 10, mitochondrial OS=Mus musculus GN=Akap10 PE=1 SV=3	Akap10	2	99206.5	36929.1	247857				36396.2	36064.6	39225.1
P02769	Serum albumin OS=Bos taurus GN=ALB PE=1 SV=4	ALB	4	679801	492253	757916	103515	136045	316139	878946	223551	158093
P02768	Serum albumin OS=Homo sapiens GN=ALB PE=1 SV=2	ALB	16	2.96342e+07	2.5285e+07	3.46522e+07	3.6157e+07	2.05305e+07	2.19433e+07	1.63414e+07	1.80995e+07	1.64788e+07
P05064	Fructose-bisphosphate aldolase A OS=Mus musculus GN=Aldoa PE=1 SV=2	Aldoa	5	1.3347e+06	99899.1	1.54694e+06	131291	26983.4	165391	320314	312807	298648
Q7TQF7	Amphiphysin OS=Mus musculus GN=Amph PE=1 SV=1	Amph	8	1.19387e+06	139889	2.37711e+06				232934	200607	215247
Q8C8R3	Ankyrin-2 OS=Mus musculus GN=Ank2 PE=1 SV=2	Ank2	18	3.188e+06	667767	6.02381e+06	173890	60489.9	145587	822191	841747	741725
A2ARS0	Ankyrin repeat domain-containing protein 63 OS=Mus musculus GN=Ankrd63 PE=1 SV=1	Ankrd63	1			67648
Q8BIZ1	Ankyrin repeat and sterile alpha motif domain-containing protein 1B OS=Mus musculus GN=Anks1b PE=1 SV=3	Anks1b	8	3.11929e+06	504391	5.17312e+06	586295	211924	583949	976822	1.04794e+06	847343
P07356	Annexin A2 OS=Mus musculus GN=Anxa2 PE=1 SV=2	Anxa2	2	66865.3	20225	233128	66010.1	45588.5	457306	188960	190956	185163
Q9DBG3	AP-2 complex subunit beta OS=Mus musculus GN=Ap2b1 PE=1 SV=1	Ap2b1	2	984764	25306.3	1.22463e+06	9226.15			92327.6	85840.6	84977.7
P84091	AP-2 complex subunit mu OS=Mus musculus GN=Ap2m1 PE=1 SV=1	Ap2m1	3	400904	45704.2	553242	410131	6024.01	5362.24	66520.3	59394.8	58790.4
Q9JME5	AP-3 complex subunit beta-2 OS=Mus musculus GN=Ap3b2 PE=1 SV=2	Ap3b2	6	807175	16044.6	1.62148e+06			27172.3	126180	107709	125856
O54774	AP-3 complex subunit delta-1 OS=Mus musculus GN=Ap3d1 PE=1 SV=1	Ap3d1	1			173419				36115.8	33361.7
P98084	Amyloid beta A4 precursor protein-binding family A member 2 OS=Mus musculus GN=Apba2 PE=1 SV=2	Apba2	3	213851	11433.7	364617
Q9QXJ1	Amyloid beta A4 precursor protein-binding family B member 1 OS=Mus musculus GN=Apbb1 PE=1 SV=3	Apbb1	11	7.1909e+06	377280	9.77393e+06	4074.3		7818.51	1.27803e+06	1.17868e+06	1.14541e+06
P61205	ADP-ribosylation factor 3 OS=Mus musculus GN=Arf3 PE=2 SV=2	Arf3	1	1.28984e+06		1.38972e+06				76016.8	93647.4	55431.4
P84084	ADP-ribosylation factor 5 OS=Mus musculus GN=Arf5 PE=1 SV=2	Arf5	1	296874	43094.5	231480	4240.41			81957.8	76272.9	97112.2
Q9EPJ9	ADP-ribosylation factor GTPase-activating protein 1 OS=Mus musculus GN=Arfgap1 PE=1 SV=2	Arfgap1	32	7.4537e+07	1.05775e+07	1.02649e+08	141807	106957	367369	1.07759e+07	1.16682e+07	1.17508e+07
Q99K28	ADP-ribosylation factor GTPase-activating protein 2 OS=Mus musculus GN=Arfgap2 PE=1 SV=1	Arfgap2	1	50499.1		150119
Q9D8S3	ADP-ribosylation factor GTPase-activating protein 3 OS=Mus musculus GN=Arfgap3 PE=1 SV=2	Arfgap3	3	451864	55579.2	613281				79227.6	78319.8	76165.6
Q8K221	Arfaptin-2 OS=Mus musculus GN=Arfip2 PE=1 SV=2	Arfip2	19	2.34107e+07	1.312e+06	3.61195e+07	395552	121685	41392.6	4.08011e+06	4.06635e+06	3.50791e+06
Q5FWK3	Rho GTPase-activating protein 1 OS=Mus musculus GN=Arhgap1 PE=1 SV=1	Arhgap1	9	6.53232e+06	495213	1.61194e+07	98302.1			1.25374e+06	1.12239e+06	901260
Q811P8	Rho GTPase-activating protein 32 OS=Mus musculus GN=Arhgap32 PE=1 SV=2	Arhgap32	2	149539		416988				22231.3	16710.6	19213.4
P59281	Rho GTPase-activating protein 39 OS=Mus musculus GN=Arhgap39 PE=1 SV=2	Arhgap39	3	399122	69772.6	726931	20342.7			99386.2	92890.8	91983.4
Q5SSM3	Rho GTPase-activating protein 44 OS=Mus musculus GN=Arhgap44 PE=1 SV=1	Arhgap44	3	286718	41952	446016				84503.2	79237.8	82195.7
Q9ES28	Rho guanine nucleotide exchange factor 7 OS=Mus musculus GN=Arhgef7 PE=1 SV=2	Arhgef7	1			60246.1
Q61137	Astrotactin-1 OS=Mus musculus GN=Astn1 PE=1 SV=4	Astn1	2	98598.7		300608				8592.48	15563.5	9740.75
Q8BHE3	Caytaxin OS=Mus musculus GN=Atcay PE=1 SV=1	Atcay	7	4.74546e+06	1.44181e+06	9.66819e+06	441810	577387	1.19528e+06	1.493e+06	1.41589e+06	1.74686e+06
Q8VDN2	Sodium/potassium-transporting ATPase subunit alpha-1 OS=Mus musculus GN=Atp1a1 PE=1 SV=1	Atp1a1	3	381369	19221.2	562842	17217.9		6373.28	48079.8	46321.4	33807.4
Q6PIE5	Sodium/potassium-transporting ATPase subunit alpha-2 OS=Mus musculus GN=Atp1a2 PE=1 SV=1	Atp1a2	2	229566	29440.1	204553	34443.2		14757.7	52434.8	54901.7	58283
Q6PIC6	Sodium/potassium-transporting ATPase subunit alpha-3 OS=Mus musculus GN=Atp1a3 PE=1 SV=1	Atp1a3	5	6.74201e+06	396836	7.6616e+06	356410	57639	274950	1.38207e+06	1.32133e+06	1.17203e+06
P14094	Sodium/potassium-transporting ATPase subunit beta-1 OS=Mus musculus GN=Atp1b1 PE=1 SV=1	Atp1b1	1			73969.3
G5E829	Plasma membrane calcium-transporting ATPase 1 OS=Mus musculus GN=Atp2b1 PE=1 SV=1	Atp2b1	4	2.12839e+06	174279	4.22827e+06	132706	23614.8	115751	487529	459126	422187
Q9R0K7	Plasma membrane calcium-transporting ATPase 2 OS=Mus musculus GN=Atp2b2 PE=1 SV=2	Atp2b2	4	597586	26444.1	1.53578e+06	52798.9	15504.3	69271.7	351533	91715.8	245540
Q6Q477	Plasma membrane calcium-transporting ATPase 4 OS=Mus musculus GN=Atp2b4 PE=1 SV=1	Atp2b4	1	122850	18611.2	179082			6165.11	35602.3	37581.2	35324.7
Q03265	ATP synthase subunit alpha, mitochondrial OS=Mus musculus GN=Atp5a1 PE=1 SV=1	Atp5a1	6	1.04242e+06	15254.3	823078	55194.4	28825.6	55192.8	99814.2	72829.9	91447.9
Q9Z1G4	V-type proton ATPase 116 kDa subunit a isoform 1 OS=Mus musculus GN=Atp6v0a1 PE=1 SV=3	Atp6v0a1	1	202080		237058
P50516	V-type proton ATPase catalytic subunit A OS=Mus musculus GN=Atp6v1a PE=1 SV=2	Atp6v1a	15	1.67275e+07	1.22658e+06	1.95525e+07	45413.8		22605.2	2.42058e+06	2.56556e+06	2.29581e+06
P62814	V-type proton ATPase subunit B, brain isoform OS=Mus musculus GN=Atp6v1b2 PE=1 SV=1	Atp6v1b2	22	4.21469e+07	9.6682e+06	5.36568e+07	558056	149177	272268	9.76393e+06	9.40451e+06	9.74129e+06
P02701	Avidin OS=Gallus gallus GN=AVD PE=1 SV=3	AVD	16	2.76519e+09	2.44114e+08	2.94213e+09	8.7011e+08	2.88136e+08	5.68535e+08	4.67403e+08	7.86383e+08	7.20455e+08
Q80U56	Late secretory pathway protein AVL9 homolog OS=Mus musculus GN=Avl9 PE=1 SV=2	Avl9	2	144182		453212				31235.6		16744.4
Q3UHD1	Brain-specific angiogenesis inhibitor 1 OS=Mus musculus GN=Bai1 PE=1 SV=1	Bai1	1	23725	3343.4	61836.4		4165.14		5724.31
Q8BKX1	Brain-specific angiogenesis inhibitor 1-associated protein 2 OS=Mus musculus GN=Baiap2 PE=1 SV=2	Baiap2	21	7.04965e+06	1.4535e+06	1.04752e+07	76249.5	8178.14	87694.7	1.39042e+06	1.5531e+06	1.58791e+06
Q91XV3	Brain acid soluble protein 1 OS=Mus musculus GN=Basp1 PE=1 SV=3	Basp1	18	1.39592e+07	3.52052e+06	2.02615e+07	1.11535e+06	333602	851983	5.09284e+06	4.90709e+06	5.0177e+06
Q61140	Breast cancer anti-estrogen resistance protein 1 OS=Mus musculus GN=Bcar1 PE=1 SV=2	Bcar1	22	1.05358e+07	1.15746e+06	1.4199e+07	42677.8	18630.3	84515.9	2.07508e+06	1.95973e+06	2.00942e+06
Q8CCN5	Breast carcinoma-amplified sequence 3 homolog OS=Mus musculus GN=Bcas3 PE=1 SV=2	Bcas3	5	533848	55219.7	1.17171e+06	35359.8		28448.2	129375	151107	146923
P70345	Bcl-2-like protein 2 OS=Mus musculus GN=Bcl2l2 PE=1 SV=1	Bcl2l2	1	313406	86460.3	321119			8226.51	108430	107557	111298
Q6PAJ1	Breakpoint cluster region protein OS=Mus musculus GN=Bcr PE=1 SV=3	Bcr	4	199001	59002.6	468195				79225.5	70166.2	82548.6
Q68EF6	Brain-enriched guanylate kinase-associated protein OS=Mus musculus GN=Begain PE=1 SV=2	Begain	4	649557	122304	1.37055e+06	27738.8	5594.37	21841.8	185610	177994	189588
O08539	Myc box-dependent-interacting protein 1 OS=Mus musculus GN=Bin1 PE=1 SV=1	Bin1	12	9.1078e+06	1.08124e+06	1.3552e+07	118346	28326.4	94324.2	2.05724e+06	2.2472e+06	2.0554e+06
O66837	Biotin [acetyl-CoA-carboxylase] ligase OS=Aquifex aeolicus (strain VF5) GN=birA PE=1 SV=1	birA	33	2.10901e+08	2.20015e+07	3.44585e+08	3.06642e+06	2.28432e+06	3.11385e+06	4.67453e+07	4.33038e+07	4.26319e+07
P28028	Serine/threonine-protein kinase B-raf OS=Mus musculus GN=Braf PE=1 SV=3	Braf	11	2.21057e+06	93132.6	6.16187e+06				201246	203925	223159
Q80Y55	BSD domain-containing protein 1 OS=Mus musculus GN=Bsdc1 PE=1 SV=1	Bsdc1	12	4.00421e+06	560607	5.07852e+06	9280.48		14629.1	980648	953196	1.03021e+06
O88737	Protein bassoon OS=Mus musculus GN=Bsn PE=1 SV=4	Bsn	114	2.17933e+08	3.47937e+07	3.3595e+08	199904	114883	211690	3.63463e+07	3.71164e+07	3.7176e+07
Q5HZI2	C2 calcium-dependent domain-containing protein 4C OS=Mus musculus GN=C2cd4cC2CD4 family PE=1 SV=1	C2cd4cC2CD4 family	2	154132	31016.3	361547	5296.74		4043.75	34663.3	34338.3	41537.9
O88602	Voltage-dependent calcium channel gamma-2 subunit OS=Mus musculus GN=Cacng2 PE=1 SV=1	Cacng2	1	118428		499172
Q8VHW2	Voltage-dependent calcium channel gamma-8 subunit OS=Mus musculus GN=Cacng8 PE=1 SV=1	Cacng8	4	474384	210252	1.0718e+06	53412.2	19498.3	40283.7	203859	180273	205327
Q80TJ1	Calcium-dependent secretion activator 1 OS=Mus musculus GN=Cadps PE=1 SV=3	Cadps	12	3.42656e+06	76629.7	5.98374e+06	4723.33		5675.55	462105	446050	481760
Q8BYR5	Calcium-dependent secretion activator 2 OS=Mus musculus GN=Cadps2 PE=1 SV=2	Cadps2	2	162463	24482.5	251382				47106.9	53628	50500
P0DP28	Calmodulin-3 OS=Mus musculus GN=Calm3 PE=1 SV=1	Calm3	3	1.86588e+06	244794	1.56505e+06	47209.9				273473	255266
P11798	Calcium/calmodulin-dependent protein kinase type II subunit alpha OS=Mus musculus GN=Camk2a PE=1 SV=2	Camk2a	8	4.36357e+06	499091	7.40411e+06	160358	22988.5	108251	1.43092e+06	1.60729e+06	1.52794e+06
P28652	Calcium/calmodulin-dependent protein kinase type II subunit beta OS=Mus musculus GN=Camk2b PE=1 SV=2	Camk2b	7	6.45772e+06	434206	1.5565e+07	68240.6	7681.62	41328.5	1.04301e+06	1.03294e+06	1.1353e+06
Q6PHZ2	Calcium/calmodulin-dependent protein kinase type II subunit delta OS=Mus musculus GN=Camk2d PE=1 SV=1	Camk2d	1	76039.4		145027				28703.9	29087.1	22522.1
Q923T9	Calcium/calmodulin-dependent protein kinase type II subunit gamma OS=Mus musculus GN=Camk2g PE=1 SV=1	Camk2g	1			106905
Q3UHL1	CaM kinase-like vesicle-associated protein OS=Mus musculus GN=Camkv PE=1 SV=2	Camkv	4	272188	92905.4	852539	40811.7	15730.5	32053.1	102366	108429	140338
A2AHC3	Calmodulin-regulated spectrin-associated protein 1 OS=Mus musculus GN=Camsap1 PE=1 SV=1	Camsap1	10	702426	148765	2.46052e+06	42135.3	37207.4	143528	194189	231372	225938
Q8C1B1	Calmodulin-regulated spectrin-associated protein 2 OS=Mus musculus GN=Camsap2 PE=1 SV=3	Camsap2	2			108545	26059.7
Q80VC9	Calmodulin-regulated spectrin-associated protein 3 OS=Mus musculus GN=Camsap3 PE=1 SV=1	Camsap3	16	1.93898e+06	342253	4.44121e+06	88132.9			515083	505175	499531
P47753	F-actin-capping protein subunit alpha-1 OS=Mus musculus GN=Capza1 PE=1 SV=4	Capza1	2	132476		248468
P47757	F-actin-capping protein subunit beta OS=Mus musculus GN=Capzb PE=1 SV=3	Capzb	1	64038.4
Q6P9K8	Caskin-1 OS=Mus musculus GN=Caskin1 PE=1 SV=2	Caskin1	7	606058	129910	1.24871e+06				85165.4	89132.8	123041
Q5SP85	Coiled-coil domain-containing protein 85A OS=Mus musculus GN=Ccdc85a PE=1 SV=1	Ccdc85a	2	411102	65174.1	545400	72816.1	50874.6	286857	200066	191731	193312
P80316	T-complex protein 1 subunit epsilon OS=Mus musculus GN=Cct5 PE=1 SV=1	Cct5	2	114075	33105.6	416126	6612.82			47841.7	42185.1	81600.4
O54901	OX-2 membrane glycoprotein OS=Mus musculus GN=Cd200 PE=1 SV=1	Cd200	3	716015	190620	1.27073e+06				43601.8	4290.23
Q61735	Leukocyte surface antigen CD47 OS=Mus musculus GN=Cd47 PE=1 SV=2	Cd47	1	1.28417e+06	187708	1.28448e+06	19387.8			154161	194392	124381
Q61081	Hsp90 co-chaperone Cdc37 OS=Mus musculus GN=Cdc37 PE=1 SV=1	Cdc37	1	80894.8	5556.16	123146		14332.3		7469.64	16954.1	14521.6
Q4VAA2	Protein CDV3 OS=Mus musculus GN=Cdv3 PE=1 SV=2	Cdv3	5	1.15975e+06	221551	2.22572e+06	7612.04		6289.27	233441	158274	218512
Q9JKC6	Cell cycle exit and neuronal differentiation protein 1 OS=Mus musculus GN=Cend1 PE=1 SV=1	Cend1	5	1.13306e+06	304897	1.04196e+06	230053	149661	321257	339759	377041	471051
Q6A065	Centrosomal protein of 170 kDa OS=Mus musculus GN=Cep170 PE=1 SV=2	Cep170	4	99423.3	43213.8	438406				44589.1	40334.5	42450.5
P18760	Cofilin-1 OS=Mus musculus GN=Cfl1 PE=1 SV=3	Cfl1	3	888025	6515.5	1.01803e+06				84253.7	103124	83788.8
Q9D8B3	Charged multivesicular body protein 4b OS=Mus musculus GN=Chmp4b PE=1 SV=2	Chmp4b	2	101416		141452
Q8WTY4	Anamorsin OS=Mus musculus GN=Ciapin1 PE=1 SV=1	Ciapin1	1	273004	31024.6	406740				68422.3	55169.1	58982.8
Q04447	Creatine kinase B-type OS=Mus musculus GN=Ckb PE=1 SV=1	Ckb	1	207375	71911.6	353523		39006.4	66997	124061	55640.6
Q99KN9	Clathrin interactor 1 OS=Mus musculus GN=Clint1 PE=1 SV=2	Clint1	6	1.07882e+06	175130	2.49359e+06				155441	258440	294427
Q68FD5	Clathrin heavy chain 1 OS=Mus musculus GN=Cltc PE=1 SV=3	Cltc	4	638160	23670.5	470069				93116.3	84094.8	100661
Q9D4C9	Clavesin-1 OS=Mus musculus GN=Clvs1 PE=1 SV=1	Clvs1	1	76837.6		118388
Q80YA9	Connector enhancer of kinase suppressor of ras 2 OS=Mus musculus GN=Cnksr2 PE=1 SV=1	Cnksr2	5	258275	19988.5	1.50771e+06				22065.2	16978.3	19903.9
Q9CWN7	CCR4-NOT transcription complex subunit 11 OS=Mus musculus GN=Cnot11 PE=1 SV=1	Cnot11	2	101380	29882.2	117490				41798.2	43295.3	40417.3
Q8C5L3	CCR4-NOT transcription complex subunit 2 OS=Mus musculus GN=Cnot2 PE=1 SV=2	Cnot2	4	475886	34039.5	1.15221e+06				32612.5	33607	39782.2
O89001	Carboxypeptidase D OS=Mus musculus GN=Cpd PE=1 SV=2	Cpd	2	170744	16160	263429	5429		7541.53	13866	20078	34759.1
P84086	Complexin-2 OS=Mus musculus GN=Cplx2 PE=1 SV=1	Cplx2	4	1.50664e+06	199598	1.39566e+06				162997	149477	164896
Q9DCT8	Cysteine-rich protein 2 OS=Mus musculus GN=Crip2 PE=1 SV=1	Crip2	4	1.21803e+06	89231.2	2.18041e+06	5838.97		9787.29	127894	169586	186419
P47941	Crk-like protein OS=Mus musculus GN=Crkl PE=1 SV=2	Crkl	2	478597		643991				102221	67343.8	55523.2
P97427	Dihydropyrimidinase-related protein 1 OS=Mus musculus GN=Crmp1 PE=1 SV=1	Crmp1	9	2.04593e+06	18256.8	6.26219e+06				1.23807e+06	269912	201199
Q68ED7	CREB-regulated transcription coactivator 1 OS=Mus musculus GN=Crtc1 PE=1 SV=1	Crtc1	5	752729	27246.7	1.65719e+06				36650.9	73956.2	93641.9
Q91W50	Cold shock domain-containing protein E1 OS=Mus musculus GN=Csde1 PE=1 SV=1	Csde1	2	421003	26478.8	781518				58470.1	48735.6	46247.9
P02662	Alpha-S1-casein OS=Bos taurus GN=CSN1S1 PE=1 SV=2	CSN1S1	13	1.82761e+07	3.91379e+06	2.51543e+07	1.24155e+07	5.76234e+06	7.63496e+06	5.46654e+06	5.0402e+06	6.52125e+06
P02663	Alpha-S2-casein OS=Bos taurus GN=CSN1S2 PE=1 SV=2	CSN1S2	6	3.71956e+06	726809	8.77863e+06	1.32041e+06	447031	1.2344e+06	1.25922e+06	871459	964686
P02666	Beta-casein OS=Bos taurus GN=CSN2 PE=1 SV=2	CSN2	4	6.56191e+06	2.39796e+06	7.43225e+06	7.10146e+06	1.42651e+06	6.13057e+06	4.87764e+06	4.28937e+06	4.28686e+06
Q9JMK2	Casein kinase I isoform epsilon OS=Mus musculus GN=Csnk1e PE=1 SV=2	Csnk1e	4	1.6536e+06	720147	2.93829e+06	31207.4	8460.79	18897.9	571281	536061	628853
O88712	C-terminal-binding protein 1 OS=Mus musculus GN=Ctbp1 PE=1 SV=2	Ctbp1	5	6.20973e+06	315784	5.57711e+06			5697.1	856858	845123	870160
P56546	C-terminal-binding protein 2 OS=Mus musculus GN=Ctbp2 PE=1 SV=2	Ctbp2	1	94740		188199
Q61301	Catenin alpha-2 OS=Mus musculus GN=Ctnna2 PE=1 SV=3	Ctnna2	11	1.18639e+06	181889	3.0617e+06	20848.1		2787.22	292727	326035	283029
Q02248	Catenin beta-1 OS=Mus musculus GN=Ctnnb1 PE=1 SV=1	Ctnnb1	11	4.524e+06	458552	8.23736e+06	169538	93534.8	227197	729127	738999	765183
P30999	Catenin delta-1 OS=Mus musculus GN=Ctnnd1 PE=1 SV=2	Ctnnd1	11	2.13352e+06	254476	3.00806e+06	18502.5	11728.1	30125.3	396500	352030	363374
O35927	Catenin delta-2 OS=Mus musculus GN=Ctnnd2 PE=1 SV=1	Ctnnd2	25	1.14851e+07	1.71515e+06	1.99271e+07	101406	28003.5	72088.1	2.83969e+06	2.79797e+06	3.01682e+06
Q60598	Src substrate cortactin OS=Mus musculus GN=Cttn PE=1 SV=2	Cttn	42	1.05165e+08	1.46705e+07	1.85275e+08	491594	251556	498503	2.18631e+07	2.21043e+07	2.30279e+07
B9EJA2	Cortactin-binding protein 2 OS=Mus musculus GN=Cttnbp2 PE=1 SV=2	Cttnbp2	6	617052	77564.7	1.4905e+06			8010.52	129826	152480	130844
P97792	Coxsackievirus and adenovirus receptor homolog OS=Mus musculus GN=Cxadr PE=1 SV=1	Cxadr	6	1.6144e+06	242936	2.70443e+06	20146.7	8888.65	14726.9	377034	403387	352372
P62897	Cytochrome c, somatic OS=Mus musculus GN=Cycs PE=1 SV=2	Cycs	1		38023.4	157051
Q5SQX6	Cytoplasmic FMR1-interacting protein 2 OS=Mus musculus GN=Cyfip2 PE=1 SV=2	Cyfip2	10	2.75854e+06	108698	6.68239e+06	5879.8	3876.08		514503	592279	504894
Q80TQ2	Ubiquitin carboxyl-terminal hydrolase CYLD OS=Mus musculus GN=Cyld PE=1 SV=2	Cyld	9	1.01926e+06	24718.7	4.02139e+06	34551.1		47560.7	42760.4	40107.7	87877.3
Q3UHC7	Disabled homolog 2-interacting protein OS=Mus musculus GN=Dab2ip PE=1 SV=1	Dab2ip	4	413289	60907.9	858623	8211.25			107789	117480	108260
Q9QXS6	Drebrin OS=Mus musculus GN=Dbn1 PE=1 SV=4	Dbn1	13	3.24125e+06	623447	5.33607e+06	70242.5	6175.35	38202.3	647763	697254	670693
Q62418	Drebrin-like protein OS=Mus musculus GN=Dbnl PE=1 SV=2	Dbnl	16	8.03457e+06	1.53691e+06	1.39029e+07	78192.4	12842.4	33875.8	1.69415e+06	1.60434e+06	1.66225e+06
Q9JLM8	Serine/threonine-protein kinase DCLK1 OS=Mus musculus GN=Dclk1 PE=1 SV=1	Dclk1	9	528546	111812	1.88782e+06	20726.3	39209.6	11819.1	113909	123689	107038
Q6PGN3	Serine/threonine-protein kinase DCLK2 OS=Mus musculus GN=Dclk2 PE=1 SV=1	Dclk2	1			42649.4
Q99KJ8	Dynactin subunit 2 OS=Mus musculus GN=Dctn2 PE=1 SV=3	Dctn2	2	96756.9		121759				13046.6	11220.8	10714.5
Q62167	ATP-dependent RNA helicase DDX3X OS=Mus musculus GN=Ddx3x PE=1 SV=3	Ddx3x	4	448652	84839	893221	6018.23		10522.4	168336	163009	154073
Q811D0	Disks large homolog 1 OS=Mus musculus GN=Dlg1 PE=1 SV=1	Dlg1	10	2.46967e+06	364100	4.42065e+06	39682.3	15734.8	73777.9	514230	532980	554606
Q91XM9	Disks large homolog 2 OS=Mus musculus GN=Dlg2 PE=1 SV=2	Dlg2	34	2.60446e+07	4.3506e+06	4.84751e+07	697664	116347	515014	6.04151e+06	6.47156e+06	6.03265e+06
P70175	Disks large homolog 3 OS=Mus musculus GN=Dlg3 PE=1 SV=1	Dlg3	11	1.3192e+06	34068.3	3.3596e+06	7161.31	17981.2		100855	81399.6	105243
Q62108	Disks large homolog 4 OS=Mus musculus GN=Dlg4 PE=1 SV=1	Dlg4	13	3.64594e+06	593380	5.99691e+06	774582	1.64659e+06	781663	881704	825648	845823
Q9D415	Disks large-associated protein 1 OS=Mus musculus GN=Dlgap1 PE=1 SV=3	Dlgap1	6	674382	79800.9	1.39601e+06	8166.92			98638	115535	180108
Q8BJ42	Disks large-associated protein 2 OS=Mus musculus GN=Dlgap2 PE=1 SV=2	Dlgap2	14	2.77974e+06	301121	5.83203e+06	54820.2	13071.9	47313.6	616447	532192	574780
Q6PFD5	Disks large-associated protein 3 OS=Mus musculus GN=Dlgap3 PE=1 SV=1	Dlgap3	15	3.80265e+06	1.58419e+06	8.09987e+06	998272	1.02272e+06	989941	1.75876e+06	1.73537e+06	1.77127e+06
B1AZP2	Disks large-associated protein 4 OS=Mus musculus GN=Dlgap4 PE=1 SV=1	Dlgap4	7	740176	162819	1.66471e+06				150254	138742	139836
Q9WV69	Dematin OS=Mus musculus GN=Dmtn PE=1 SV=1	Dmtn	9	3.4968e+06	1.006e+06	7.72664e+06	87049.2	20254.7	25196.4	800560	887521	833171
Q8BPN8	DmX-like protein 2 OS=Mus musculus GN=Dmxl2 PE=1 SV=3	Dmxl2	10	932084	16199.2	1.6811e+06			3824.61	134734	125525	126057
Q9QYJ3	DnaJ homolog subfamily B member 1 OS=Mus musculus GN=Dnajb1 PE=1 SV=3	Dnajb1	11	6.49577e+06	2.15116e+06	1.24021e+07	114941	37322.7	59723	1.80802e+06	2.2788e+06	2.00097e+06
O54946	DnaJ homolog subfamily B member 6 OS=Mus musculus GN=Dnajb6 PE=1 SV=4	Dnajb6	2	129985	3681.03	320652				5015.04	5478.62
Q80TZ3	Putative tyrosine-protein phosphatase auxilin OS=Mus musculus GN=Dnajc6 PE=1 SV=2	Dnajc6	14	4.51262e+06	961748	7.91606e+06	26300.7		12781.4	1.25598e+06	1.2157e+06	1.10763e+06
P39053	Dynamin-1 OS=Mus musculus GN=Dnm1 PE=1 SV=2	Dnm1	28	1.21532e+07	1.13769e+06	1.70601e+07	129281	32728.8	77748.7	2.50831e+06	2.19348e+06	2.29104e+06
O08553	Dihydropyrimidinase-related protein 2 OS=Mus musculus GN=Dpysl2 PE=1 SV=2	Dpysl2	12	1.43702e+07	3.6723e+06	2.58871e+07	382756	112499	208720	3.40337e+06	3.31321e+06	3.58567e+06
Q62188	Dihydropyrimidinase-related protein 3 OS=Mus musculus GN=Dpysl3 PE=1 SV=1	Dpysl3	6	927358	499108	2.1767e+06	155208	176454	202930	189852	216616	254738
O35098	Dihydropyrimidinase-related protein 4 OS=Mus musculus GN=Dpysl4 PE=1 SV=1	Dpysl4	2		53588	265813	7789.09		5187.3	40850.5	49546.9	54512.5
Q7TSF1	Desmoglein-1-beta OS=Mus musculus GN=Dsg1b PE=1 SV=1	Dsg1b	3	409018	107593	465045	185251	144291	548863	265128	200928	217344
E9Q557	Desmoplakin OS=Mus musculus GN=Dsp PE=1 SV=1	Dsp	16	1.7732e+06	472776	2.14888e+06	1.18014e+06	581480	1.6973e+06	974274	925144	955609
Q9D2N4	Dystrobrevin alpha OS=Mus musculus GN=Dtna PE=1 SV=2	Dtna	1	47277.1	13745.4	64031.8				19475.8	17194.1	16594.3
P51141	Segment polarity protein dishevelled homolog DVL-1 OS=Mus musculus GN=Dvl1 PE=1 SV=2	Dvl1	1	28287.4		40788.4
Q61062	Segment polarity protein dishevelled homolog DVL-3 OS=Mus musculus GN=Dvl3 PE=1 SV=2	Dvl3	3	407081	49937.5	799218	8352.74		6236.23	101704	111800	100986
Q6PDL0	Cytoplasmic dynein 1 light intermediate chain 2 OS=Mus musculus GN=Dync1li2 PE=1 SV=2	Dync1li2	2	82408.1		184120				23042.9	16725.5	20876.1
Q3UJB9	Enhancer of mRNA-decapping protein 4 OS=Mus musculus GN=Edc4 PE=1 SV=2	Edc4	3	193018		327967				40377.1	39246.2	24943.3
P10126	Elongation factor 1-alpha 1 OS=Mus musculus GN=Eef1a1 PE=1 SV=3	Eef1a1	3	3.96986e+06	705453	7.79958e+06	176330	38695.1	230973	1.17196e+06	638250	683312
P62631	Elongation factor 1-alpha 2 OS=Mus musculus GN=Eef1a2 PE=1 SV=1	Eef1a2	3	438523	58217.1	662903		4542.01		115214	121047	105133
Q9D8Y0	EF-hand domain-containing protein D2 OS=Mus musculus GN=Efhd2 PE=1 SV=1	Efhd2	4	1.02366e+06		1.5378e+06				29614.4	25669	25478.9
Q9QXY6	EH domain-containing protein 3 OS=Mus musculus GN=Ehd3 PE=1 SV=2	Ehd3	2	54611.1		143452
Q8BGD9	Eukaryotic translation initiation factor 4B OS=Mus musculus GN=Eif4b PE=1 SV=1	Eif4b	11	2.57478e+06	597603	4.20189e+06	79173.7	69294.6	114390	512812	526248	572594
Q80XI3	Eukaryotic translation initiation factor 4 gamma 3 OS=Mus musculus GN=Eif4g3 PE=1 SV=2	Eif4g3	1		6923.77	66381				12969.7	12105
P63242	Eukaryotic translation initiation factor 5A-1 OS=Mus musculus GN=Eif5a PE=1 SV=2	Eif5a	4	683082	82879.9	1.10181e+06	10964.2		13925.3	134859	143129	158138
Q8C8T7	Protein ELFN1 OS=Mus musculus GN=Elfn1 PE=2 SV=1	Elfn1	9	1.69729e+06	196884	3.06298e+06	16888		15920.3	431068	437350	421384
Q68FM6	Protein phosphatase 1 regulatory subunit 29 OS=Mus musculus GN=Elfn2 PE=1 SV=1	Elfn2	8	1.81053e+06	153550	3.0525e+06	41120.7	9544.93	18168.3	405649	454946	415258
Q9Z2H5	Band 4.1-like protein 1 OS=Mus musculus GN=Epb41l1 PE=1 SV=2	Epb41l1	27	1.38157e+07	2.72817e+06	2.83995e+07	472601	61057	309214	3.79754e+06	3.78789e+06	3.86104e+06
Q9WV92	Band 4.1-like protein 3 OS=Mus musculus GN=Epb41l3 PE=1 SV=1	Epb41l3	17	4.88437e+06	719929	8.39775e+06	232222	43699.3	187259	1.12345e+06	1.32545e+06	1.1705e+06
Q80VP1	Epsin-1 OS=Mus musculus GN=Epn1 PE=1 SV=3	Epn1	1	40599.1		133621
Q8CHU3	Epsin-2 OS=Mus musculus GN=Epn2 PE=1 SV=1	Epn2	4	240604	8188.46	694740				23802.7	27853.2	20711.9
Q60902	Epidermal growth factor receptor substrate 15-like 1 OS=Mus musculus GN=Eps15l1 PE=1 SV=3	Eps15l1	20	6.95975e+06	1.30603e+06	1.37046e+07	41903.2	191928	802644	826176	907117	984619
Q99MI1	ELKS/Rab6-interacting/CAST family member 1 OS=Mus musculus GN=Erc1 PE=1 SV=1	Erc1	1	59977.2		149957
Q6PH08	ERC protein 2 OS=Mus musculus GN=Erc2 PE=1 SV=2	Erc2	23	6.49155e+06	883525	1.01277e+07			13237.4	1.31674e+06	1.27596e+06	1.41156e+06
Q8K097	Protein lifeguard 2 OS=Mus musculus GN=Faim2 PE=2 SV=1	Faim2	1	411826		449089
Q6A0A9	Constitutive coactivator of PPAR-gamma-like protein 1 OS=Mus musculus GN=FAM120A PE=1 SV=2	FAM120A	2	47451.7		199325
Q8C729	Protein FAM126B OS=Mus musculus GN=Fam126b PE=1 SV=1	Fam126b	1	107301		117338
Q3TY60	Protein FAM131B OS=Mus musculus GN=Fam131b PE=1 SV=1	Fam131b	11	2.54598e+07	7.39979e+06	4.07775e+07	633866	204071	351888	6.95689e+06	7.29982e+06	7.98703e+06
A2A699	Protein FAM171A2 OS=Mus musculus GN=Fam171a2 PE=1 SV=1	Fam171a2	14	7.70517e+06	1.21627e+06	1.23357e+07	335452	25825	53380.5	1.47687e+06	1.29279e+06	1.16685e+06
Q14CH0	Protein FAM171B OS=Mus musculus GN=Fam171b PE=1 SV=2	Fam171b	11	1.53403e+06	226014	5.66467e+06	6952.36			317204	290886	290713
Q6NS60	F-box only protein 41 OS=Mus musculus GN=Fbxo41 PE=1 SV=3	Fbxo41	5	875947	132649	2.06416e+06	34322.2	15988.3	36085.7	345913	359655	288348
P97447	Four and a half LIM domains protein 1 OS=Mus musculus GN=Fhl1 PE=1 SV=3	Fhl1	1	127929		402452				17515.9	12225.9	16053
P26883	Peptidyl-prolyl cis-trans isomerase FKBP1A OS=Mus musculus GN=Fkbp1a PE=1 SV=2	Fkbp1a	1	167154		137931				10644.8
O08917	Flotillin-1 OS=Mus musculus GN=Flot1 PE=1 SV=1	Flot1	5	907211	59968.8	1.77934e+06				133857	143659	140306
Q8K012	Formin-binding protein 1-like OS=Mus musculus GN=Fnbp1l PE=1 SV=2	Fnbp1l	17	3.00919e+06	430553	7.27967e+06	108555		16380.1	572252	614008	659634
P97379	Ras GTPase-activating protein-binding protein 2 OS=Mus musculus GN=G3bp2 PE=1 SV=2	G3bp2	1	201206	54592.4	385189	6300.94			69130	53722.4	69896.1
P62812	Gamma-aminobutyric acid receptor subunit alpha-1 OS=Mus musculus GN=Gabra1 PE=1 SV=1	Gabra1	6	2.25953e+06	389486	5.26954e+06	322921	114226	293580	900771	882949	973107
P26049	Gamma-aminobutyric acid receptor subunit alpha-3 OS=Mus musculus GN=Gabra3 PE=1 SV=1	Gabra3	3	210841	51183.8	368612	19271.3		23155.9	78100.2	70631.4	41814.6
P48320	Glutamate decarboxylase 2 OS=Mus musculus GN=Gad2 PE=1 SV=1	Gad2	3	790394	149854	1.12427e+06				162440	250675	290086
Q99KY4	Cyclin-G-associated kinase OS=Mus musculus GN=Gak PE=1 SV=2	Gak	9	755280	38161.2	1.64188e+06	7089.99		10000.1	77871.5	80128.3	78354.6
P06837	Neuromodulin OS=Mus musculus GN=Gap43 PE=1 SV=1	Gap43	6	956388	190183	1.61559e+06	29961.6		6494.01	256334	253698	285048
P16858	Glyceraldehyde-3-phosphate dehydrogenase OS=Mus musculus GN=Gapdh PE=1 SV=2	Gapdh	6	4.15451e+06	388529	4.73699e+06	352387	122095	474310	700131	801827	1.04131e+06
P21614	Vitamin D-binding protein OS=Mus musculus GN=Gc PE=1 SV=2	Gc	1	166053	62101.3	191673	110455	114631	109705	94829.2	103747	103823
Q9R111	Guanine deaminase OS=Mus musculus GN=Gda PE=1 SV=1	Gda	1	42750.3		74168.3
Q640M6	Glycerophosphodiester phosphodiesterase domain-containing protein 5 OS=Mus musculus GN=Gdpd5 PE=2 SV=1	Gdpd5	3	315386	19570.3	599405	27368.3	30549.5	25866	55478.7	50103.1	56191.4
Q68FF6	ARF GTPase-activating protein GIT1 OS=Mus musculus GN=Git1 PE=1 SV=1	Git1	8	1.98208e+06	150604	3.62053e+06	10285.8		8291.83	334712	336496	387215
P26443	Glutamate dehydrogenase 1, mitochondrial OS=Mus musculus GN=Glud1 PE=1 SV=1	Glud1	1	24927		59056.6
P18872	Guanine nucleotide-binding protein G(o) subunit alpha OS=Mus musculus GN=Gnao1 PE=1 SV=3	Gnao1	3	1.38865e+06		2.23876e+06	25073.3	5633.81	26446.2	300877	259115	381461
P35803	Neuronal membrane glycoprotein M6-b OS=Mus musculus GN=Gpm6b PE=1 SV=2	Gpm6b	3	1.55821e+06	373116	2.37241e+06	246209	8009.39	127758	546730	534227	572607
Q8VCE2	GPN-loop GTPase 1 OS=Mus musculus GN=Gpn1 PE=1 SV=1	Gpn1	5	2.09484e+06	482675	3.06789e+06				236623	245581	213079
Q8C419	Probable G-protein coupled receptor 158 OS=Mus musculus GN=Gpr158 PE=1 SV=2	Gpr158	12	1.82344e+06	180917	4.88292e+06	10672.1			269139	308897	361468
Q3UNH4	G protein-regulated inducer of neurite outgrowth 1 OS=Mus musculus GN=Gprin1 PE=1 SV=2	Gprin1	31	1.42695e+07	2.62418e+06	2.47258e+07	1.62251e+06	638345	1.38617e+06	3.95997e+06	3.79276e+06	3.84343e+06
P23819	Glutamate receptor 2 OS=Mus musculus GN=Gria2 PE=1 SV=3	Gria2	4	1.65173e+06	125991	2.37789e+06	84044.8	18767.7	25982	208257	215591	228168
Q9Z2W8	Glutamate receptor 4 OS=Mus musculus GN=Gria4 PE=1 SV=2	Gria4	1	179071	48662.2	252417	24978	11734		67764.1	82150.9	72937.6
P35436	Glutamate receptor ionotropic, NMDA 2A OS=Mus musculus GN=Grin2a PE=1 SV=2	Grin2a	7	609010	80496.3	2.14767e+06	35257	6169.79	31962.9	155871	152486	166746
Q01097	Glutamate receptor ionotropic, NMDA 2B OS=Mus musculus GN=Grin2b PE=1 SV=3	Grin2b	2	99779.9		451005
Q925T6	Glutamate receptor-interacting protein 1 OS=Mus musculus GN=Grip1 PE=1 SV=1	Grip1	3	450272	7894.99	770281				76904.4	83433.4	75266.6
Q99MK8	Beta-adrenergic receptor kinase 1 OS=Mus musculus GN=Grk2 PE=1 SV=2	Grk2	4	234387	140705	571674	280476	83349.7	107643	262629	310238	380296
Q2NL51	Glycogen synthase kinase-3 alpha OS=Mus musculus GN=Gsk3a PE=1 SV=2	Gsk3a	4	362292		1.12032e+06				89587.9	56112.1	94661.4
Q9WV60	Glycogen synthase kinase-3 beta OS=Mus musculus GN=Gsk3b PE=1 SV=2	Gsk3b	3	583080	13800.7	2.26124e+06				25761.6	23024.5
Q9JKS5	Intracellular hyaluronan-binding protein 4 OS=Mus musculus GN=Habp4 PE=1 SV=2	Habp4	3	364373	105706	413041	161361		92819	138933	161321	219683
Q8VDJ3	Vigilin OS=Mus musculus GN=Hdlbp PE=1 SV=1	Hdlbp	7	601965	27566.7	1.31547e+06	5433.66			80163.8	65260.7	80808.6
P61979	Heterogeneous nuclear ribonucleoprotein K OS=Mus musculus GN=Hnrnpk PE=1 SV=1	Hnrnpk	2			36309				54141.6
Q9Z2Y3	Homer protein homolog 1 OS=Mus musculus GN=Homer1 PE=1 SV=2	Homer1	5	739333	23143.2	1.14083e+06	7642.15	3766.05	11387.4	144805	107009	143287
Q9QWW1	Homer protein homolog 2 OS=Mus musculus GN=Homer2 PE=1 SV=1	Homer2	1	106050		139184				6882.55	8551.31	7593.22
P62748	Hippocalcin-like protein 1 OS=Mus musculus GN=Hpcal1 PE=1 SV=2	Hpcal1	3	748196	111011	621362	26906.2		13575.2	212726	197886	195046
Q8BGZ1	Hippocalcin-like protein 4 OS=Mus musculus GN=Hpcal4 PE=1 SV=3	Hpcal4	1			76063.3					19000.9
P63017	Heat shock cognate 71 kDa protein OS=Mus musculus GN=Hspa8 PE=1 SV=1	Hspa8	9	1.86637e+06	168780	3.35588e+06	133988	65596.1	185463	533674	331262	363722
P63038	60 kDa heat shock protein, mitochondrial OS=Mus musculus GN=Hspd1 PE=1 SV=1	Hspd1	1	42873.6	45439.8				14536.2
E9PZ19	Protein turtle homolog B OS=Mus musculus GN=Igsf9b PE=1 SV=1	Igsf9b	2	62179.1	21028.8	59600.4				4590.29		22908.5
B5TVM2	Immunoglobulin-like domain-containing receptor 2 OS=Mus musculus GN=Ildr2 PE=1 SV=2	Ildr2	2	256243	58427.9	376291	17335.6	10764.9	7640.85	56692.9	62748.7	47341.9
Q8R0S2	IQ motif and SEC7 domain-containing protein 1 OS=Mus musculus GN=Iqsec1 PE=1 SV=2	Iqsec1	6	1.36113e+06	76626.4	2.28933e+06	9210.43			202575	219774	200316
Q5DU25	IQ motif and SEC7 domain-containing protein 2 OS=Mus musculus GN=Iqsec2 PE=1 SV=3	Iqsec2	5	609371	42505.7	1.06773e+06				96600.2	81098.2	80066.7
Q3TES0	IQ motif and SEC7 domain-containing protein 3 OS=Mus musculus GN=Iqsec3 PE=1 SV=1	Iqsec3	2	70601		229235					6550.65
Q9CX00	IST1 homolog OS=Mus musculus GN=Ist1 PE=1 SV=1	Ist1	9	5.02543e+06	350547	7.34701e+06	33352.1		37957.1	1.10613e+06	1.1705e+06	1.13664e+06
Q9Z0R4	Intersectin-1 OS=Mus musculus GN=Itsn1 PE=1 SV=2	Itsn1	7	609508	87587.5	1.28071e+06				170796	215478	164589
Q9Z0R6	Intersectin-2 OS=Mus musculus GN=Itsn2 PE=1 SV=2	Itsn2	5	326432	18188.9	680264				154812	74137.6	103321
Q5DTX6	Junctional protein associated with coronary artery disease OS=Mus musculus GN=Jcad PE=1 SV=2	Jcad	9	662724	306415	1.06046e+06	4146.52	2886.76		166264	169982	189408
P97825	Jupiter microtubule associated homolog 1 OS=Mus musculus GN=JPT1 PE=1 SV=3	JPT1	1	249418		537820					52556.1
Q02257	Junction plakoglobin OS=Mus musculus GN=Jup PE=1 SV=3	Jup	11	1.59694e+06	293960	3.18269e+06	380921	348771	881792	492627	529200	590869
Q9JK45	Potassium voltage-gated channel subfamily KQT member 5 OS=Mus musculus GN=Kcnq5 PE=1 SV=2	Kcnq5	2	4.18426e+07	3.0256e+07	5.57614e+07	4.20371e+07	9.13769e+07	7.94774e+07	6.23946e+07	6.0531e+07	9.38102e+07
Q8R0A7	Uncharacterized protein KIAA0513 OS=Mus musculus GN=Kiaa0513 PE=1 SV=1	Kiaa0513	1			111605
Q80TK0	Uncharacterized protein KIAA1107 OS=Mus musculus GN=Kiaa1107 PE=1 SV=5	Kiaa1107	4	328673	117068	887030				141969	140256	153027
Q148V7	LisH domain and HEAT repeat-containing protein KIAA1468 OS=Mus musculus GN=Kiaa1468 PE=1 SV=1	Kiaa1468	3	784033	204051	998791	410380	88594.8	223138	420907	372292	415025
P28740	Kinesin-like protein KIF2A OS=Mus musculus GN=Kif2a PE=1 SV=2	Kif2a	3	37081	66954.6	526646	5121.23			30051.2	87480.8	97494
P28738	Kinesin heavy chain isoform 5C OS=Mus musculus GN=Kif5c PE=1 SV=3	Kif5c	3	115580	12275.9	291948				28585.4	30507.4	22427.5
Q61792	LIM and SH3 domain protein 1 OS=Mus musculus GN=Lasp1 PE=1 SV=1	Lasp1	13	2.51561e+07	5.61356e+06	4.25423e+07	657239	131772	139215	6.5758e+06	6.77427e+06	6.82375e+06
Q7TQ95	Protein lunapark OS=Mus musculus GN=Lnp PE=1 SV=1	Lnp	3	150494	18255	489876	23001.5	4590.31	12225.2	59777.8	72499.2	67834.6
Q80TE7	Leucine-rich repeat-containing protein 7 OS=Mus musculus GN=Lrrc7 PE=1 SV=2	Lrrc7	50	3.12314e+07	6.60816e+06	5.8691e+07	1.08166e+06	864023	1.57045e+06	8.00088e+06	7.90225e+06	8.13904e+06
Q80XG9	Leucine-rich repeat transmembrane neuronal protein 4 OS=Mus musculus GN=Lrrtm4 PE=1 SV=2	Lrrtm4	1	67156.4		131159
Q9D0E3	LysM and putative peptidoglycan-binding domain-containing protein 1 OS=Mus musculus GN=Lysmd1 PE=1 SV=1	Lysmd1	2	673422	53815.8	1.18322e+06				41006.8	41367.8	45296.8
P17897	Lysozyme C-1 OS=Mus musculus GN=Lyz1 PE=1 SV=1	Lyz1	1				42661.4		56960.4
A2AHG0	Leucine zipper putative tumor suppressor 3 OS=Mus musculus GN=Lzts3 PE=1 SV=1	Lzts3	4	430962	118121	698049				107473	105908	126837
Q80U28	MAP kinase-activating death domain protein OS=Mus musculus GN=Madd PE=1 SV=2	Madd	5	293637	42093	1.10657e+06	6376.39			113042	105930	117587
Q6RHR9	Membrane-associated guanylate kinase, WW and PDZ domain-containing protein 1 OS=Mus musculus GN=Magi1 PE=1 SV=1	Magi1	7	932879	101070	1.7243e+06				140852	135146	143391
Q9WVQ1	Membrane-associated guanylate kinase, WW and PDZ domain-containing protein 2 OS=Mus musculus GN=Magi2 PE=1 SV=2	Magi2	8	1.40598e+06	152527	3.08248e+06				379161	296857	395942
Q9QYR6	Microtubule-associated protein 1A OS=Mus musculus GN=Map1a PE=1 SV=2	Map1a	33	7.51582e+06	1.39421e+06	1.41866e+07	315059	109705	212588	1.85851e+06	1.90034e+06	1.83062e+06
P14873	Microtubule-associated protein 1B OS=Mus musculus GN=Map1b PE=1 SV=2	Map1b	17	1.77556e+06	92330	4.26307e+06	14272.8	17339.8	116496	174249	198006	202778
P20357	Microtubule-associated protein 2 OS=Mus musculus GN=Map2 PE=1 SV=2	Map2	77	3.50448e+07	5.88679e+06	7.71062e+07	4.07903e+06	2.90239e+06	3.4426e+06	9.44909e+06	9.26564e+06	1.02296e+07
Q62073	Mitogen-activated protein kinase kinase kinase 7 OS=Mus musculus GN=Map3k7 PE=1 SV=1	Map3k7	3	406311	58676.8	488109				96255.3	84076.1	73370.2
P27546	Microtubule-associated protein 4 OS=Mus musculus GN=Map4 PE=1 SV=3	Map4	24	1.68823e+07	5.8874e+06	3.21456e+07	3.44057e+06	6.62719e+06	1.01256e+07	4.27187e+06	6.14629e+06	1.67371e+07
Q61161	Mitogen-activated protein kinase kinase kinase kinase 2 OS=Mus musculus GN=Map4k2 PE=1 SV=1	Map4k2	2	81769.2		282153
Q7TSJ2	Microtubule-associated protein 6 OS=Mus musculus GN=Map6 PE=1 SV=2	Map6	39	1.39728e+07	5.80763e+06	3.32765e+07	871931	616157	585793	3.65861e+06	3.44078e+06	3.40865e+06
Q6PER3	Microtubule-associated protein RP/EB family member 3 OS=Mus musculus GN=Mapre3 PE=1 SV=1	Mapre3	3	356631	3213.24	426229
P10637	Microtubule-associated protein tau OS=Mus musculus GN=Mapt PE=1 SV=3	Mapt	34	6.17582e+07	2.12208e+07	1.30797e+08	831232	142652	423067	1.9581e+07	1.99867e+07	2.29595e+07
Q99MR8	Methylcrotonoyl-CoA carboxylase subunit alpha, mitochondrial OS=Mus musculus GN=Mccc1 PE=1 SV=2	Mccc1	25	1.60658e+07	1.72778e+06	2.6922e+07	9.56902e+06	1.77172e+06	4.95614e+06	3.14501e+06	3.40384e+06	3.13952e+06
P08249	Malate dehydrogenase, mitochondrial OS=Mus musculus GN=Mdh2 PE=1 SV=3	Mdh2	4	710812	54619.6	1.09626e+06	197748	5179.56	156380	183376	131111	144801
Q6PCP5	Mitochondrial fission factor OS=Mus musculus GN=Mff PE=1 SV=1	Mff	2	100088	5660.93	144782	2419.89		19606.2	15620.6	15833.4	11669.8
Q9JM52	Misshapen-like kinase 1 OS=Mus musculus GN=Mink1 PE=1 SV=3	Mink1	3	278583	58887.7	710744				82871.1	62006.7	83803.8
P59759	MKL/myocardin-like protein 2 OS=Mus musculus GN=Mkl2 PE=1 SV=1	Mkl2	5	404728	132758	977642	9085.79			105535	90448	95788.7
Q5FW52	Muscular LMNA-interacting protein OS=Mus musculus GN=Mlip PE=1 SV=1	Mlip	4	276756	12748.2	655467				22284.3	33603.8	13942.3
P00405	Cytochrome c oxidase subunit 2 OS=Mus musculus GN=Mtco2 PE=1 SV=1	Mtco2	2	696547	40235.7	383711	148086	29595.2	107046	122651	132144	140872
Q9Z2C9	Myotubularin-related protein 7 OS=Mus musculus GN=Mtmr7 PE=1 SV=2	Mtmr7	3			215498				121146		123255
Q78ZA7	Nucleosome assembly protein 1-like 4 OS=Mus musculus GN=Nap1l4 PE=1 SV=1	Nap1l4	2	171200	7088.35	232015			10736.4	35295	31655.2	34874.6
Q9CWZ7	Gamma-soluble NSF attachment protein OS=Mus musculus GN=Napg PE=1 SV=1	Napg	2	408696		402690					81760.3
Q8CH77	Neuron navigator 1 OS=Mus musculus GN=Nav1 PE=1 SV=2	Nav1	5	318437	120562	576381				120225	6.30864e+06	8.38093e+06
Q9EPN1	Neurobeachin OS=Mus musculus GN=Nbea PE=1 SV=1	Nbea	7	440235	23747.2	1.0391e+06	3342.88			42335.8	55512.7	63450.8
P13595	Neural cell adhesion molecule 1 OS=Mus musculus GN=Ncam1 PE=1 SV=3	Ncam1	10	1.52471e+06	242560	2.70681e+06	25726.6	8462.63	34421.8	169798	144498	164966
P28660	Nck-associated protein 1 OS=Mus musculus GN=Nckap1 PE=1 SV=2	Nckap1	2	136215	9060.35	143662				28964.2	17555.4	30339.3
Q6DFV7	Nuclear receptor coactivator 7 OS=Mus musculus GN=Ncoa7 PE=1 SV=2	Ncoa7	3	237297	55398.6	635706			10607.1	69785.1	66693.9	88644.2
Q9DC07	LIM zinc-binding domain-containing Nebulette OS=Mus musculus GN=Nebl PE=1 SV=1	Nebl	11	6.12258e+06	1.12318e+06	1.12949e+07	36539.8	4881.64	31686.8	1.29091e+06	1.25503e+06	1.0727e+06
Q9CR95	Adaptin ear-binding coat-associated protein 1 OS=Mus musculus GN=Necap1 PE=1 SV=2	Necap1	6	2.35567e+06	307776	6.2041e+06	5237.87	81737	228971	327775	153742	489874
Q9JKF6	Nectin-1 OS=Mus musculus GN=Nectin1 PE=1 SV=3	Nectin1	2	1.43283e+06	147148	1.49096e+06	697157	220535	210200	427628	444580	445233
P60761	Neurogranin OS=Mus musculus GN=Nrgn PE=1 SV=1	Nrgn	1	342964	90795.2	352428	14874.8	5092.49	10591.7	108484	89259.3	91317.3
P46460	Vesicle-fusing ATPase OS=Mus musculus GN=Nsf PE=1 SV=2	Nsf	13	3.60566e+06	202134	5.8622e+06	41998.3	3732.5	49913.3	498843	524083	565484
Q9CZ44	NSFL1 cofactor p47 OS=Mus musculus GN=Nsfl1c PE=1 SV=1	Nsfl1c	3	321864		746383			4161.11	11221.4		25025.5
O08919	Numb-like protein OS=Mus musculus GN=Numbl PE=1 SV=3	Numbl	6	1.00294e+06	65105.5	3.42939e+06			17639.1	138395	151144	127612
Q6P5U7	NACHT and WD repeat domain-containing protein 2 OS=Mus musculus GN=Nwd2 PE=1 SV=2	Nwd2	7	1.42064e+06	97553.3	2.62562e+06				174267	171015	174875
Q8BM65	Neuronal tyrosine-phosphorylated phosphoinositide-3-kinase adapter 2 OS=Mus musculus GN=Nyap2 PE=1 SV=1	Nyap2	11	1.9768e+06	294357	4.37139e+06	27397.7	7555.77	21548.3	385770	461174	386188
Q6NVF0	Inositol polyphosphate 5-phosphatase OCRL-1 OS=Mus musculus GN=Ocrl PE=1 SV=1	Ocrl	8	411496	16128	1.49558e+06				66017.8	48051.8	38199.5
Q8CGY8	UDP-N-acetylglucosamine--peptide N-acetylglucosaminyltransferase 110 kDa subunit OS=Mus musculus GN=Ogt PE=1 SV=2	Ogt	1	71150	19115.4	62226			22015.4	27196.4	25336.6	31841.3
Q4KMM3	Oxidation resistance protein 1 OS=Mus musculus GN=Oxr1 PE=1 SV=3	Oxr1	30	1.82755e+07	2.57755e+06	2.7114e+07	69331.4	16464.3	73888.9	3.27701e+06	3.40557e+06	3.31299e+06
Q61644	Protein kinase C and casein kinase substrate in neurons protein 1 OS=Mus musculus GN=Pacsin1 PE=1 SV=1	Pacsin1	2	609960	157641	853777	17608.8		13151.2	224399	244571	270952
Q9WVE8	Protein kinase C and casein kinase substrate in neurons protein 2 OS=Mus musculus GN=Pacsin2 PE=1 SV=1	Pacsin2	2	606863	121345	659171	9946.22	8943.76	21918	181660	179421	184268
O88643	Serine/threonine-protein kinase PAK 1 OS=Mus musculus GN=Pak1 PE=1 SV=1	Pak1	4	1.13908e+06	146077	1.87752e+06	6781.09			295691	315917	315910
Q9Z0P4	Paralemmin-1 OS=Mus musculus GN=Palm PE=1 SV=1	Palm	3	832512	85778.6	959052	46387.3	21790.3	30706.8	170753	161201	152089
Q8BR92	Paralemmin-2 OS=Mus musculus GN=Palm2 PE=1 SV=1	Palm2	3	623809	63387.5	1.30966e+06	31730.5	5943.73	43457.6	194803	190243	180052
Q9JHU2	Palmdelphin OS=Mus musculus GN=Palmd PE=1 SV=1	Palmd	2	214222	25379.3	473557				9294.63	66093.8	6799.99
Q05920	Pyruvate carboxylase, mitochondrial OS=Mus musculus GN=Pc PE=1 SV=1	Pc	76	2.90106e+08	4.44561e+07	4.18003e+08	1.81994e+08	6.52897e+07	1.52117e+08	1.20073e+08	1.11023e+08	1.22836e+08
P60335	Poly(rC)-binding protein 1 OS=Mus musculus GN=Pcbp1 PE=1 SV=1	Pcbp1	3	638796	97124.3	1.00099e+06	11809.5		8974.23	141322	140776	150998
Q91ZA3	Propionyl-CoA carboxylase alpha chain, mitochondrial OS=Mus musculus GN=Pcca PE=1 SV=2	Pcca	60	2.63197e+08	4.47522e+07	4.50998e+08	1.65918e+08	5.21602e+07	1.68149e+08	1.25507e+08	1.1827e+08	1.20668e+08
Q9QYX7	Protein piccolo OS=Mus musculus GN=Pclo PE=1 SV=4	Pclo	137	9.9527e+07	1.95044e+07	1.40926e+08	2.49644e+06	783618	1.7754e+06	2.30166e+07	2.20458e+07	2.31742e+07
P23506	Protein-L-isoaspartate(D-aspartate) O-methyltransferase OS=Mus musculus GN=Pcmt1 PE=1 SV=3	Pcmt1	5	2.41824e+06	58765.2	2.07949e+06				171754	223113	207804
Q3UHX2	28 kDa heat- and acid-stable phosphoprotein OS=Mus musculus GN=Pdap1 PE=1 SV=1	Pdap1	7	786647	18538.7	1.99469e+06		5492.59	6968.74	117940	102895	88076.9
Q9DBX2	Phosducin-like protein OS=Mus musculus GN=Pdcl PE=1 SV=1	Pdcl	2	426566	36218.8	679262				31122.9	31193	27073.3
O70209	PDZ and LIM domain protein 3 OS=Mus musculus GN=Pdlim3 PE=1 SV=1	Pdlim3	1			73393.8
P70296	Phosphatidylethanolamine-binding protein 1 OS=Mus musculus GN=Pebp1 PE=1 SV=3	Pebp1	3	2.50536e+06	550200	5071568	88427.6	25046.5	100702	1.01067e+06	1.08271e+06	916853
O09012	Peroxisomal targeting signal 1 receptor OS=Mus musculus GN=Pex5 PE=1 SV=2	Pex5	4	505948	57477.4	1.02272e+06		8447.71		154656	21879.4	73121.2
Q8C437	PEX5-related protein OS=Mus musculus GN=Pex5l PE=1 SV=2	Pex5l	7	1.60661e+06	137125	2.14852e+06	8715.71	2608.63	53286.3	241172	189619	154280
Q9JJV2	Profilin-2 OS=Mus musculus GN=Pfn2 PE=1 SV=3	Pfn2	1	123313		129510				6394.5		8826.62
Q9DBJ1	Phosphoglycerate mutase 1 OS=Mus musculus GN=Pgam1 PE=1 SV=3	Pgam1	4	773082	71721.6	970828	9421.93		5791.85	117976	132408	117041
Q2M3X8	Phosphatase and actin regulator 1 OS=Mus musculus GN=Phactr1 PE=1 SV=1	Phactr1	3	480991	10148.8	823486				21153.4	69361.8	92679.6
Q80TL4	PHD finger protein 24 OS=Mus musculus GN=Phf24 PE=1 SV=2	Phf24	7	1.67193e+06	248607	2.49726e+06	32097.3	22237.5	35866.2	293174	273909	312897
Q7M6Y3	Phosphatidylinositol-binding clathrin assembly protein OS=Mus musculus GN=Picalm PE=1 SV=1	Picalm	11	3.5622e+06	617436	6.13327e+06	63101.7	10845.2	31552.6	815939	763482	826684
Q62083	PRKCA-binding protein OS=Mus musculus GN=Pick1 PE=1 SV=2	Pick1	2	288936		324320
Q9QUR7	Peptidyl-prolyl cis-trans isomerase NIMA-interacting 1 OS=Mus musculus GN=Pin1 PE=1 SV=1	Pin1	5	1.29454e+06	433741	1.89556e+06	409015		138148	20331.3	57113.9	101198
O35954	Membrane-associated phosphatidylinositol transfer protein 1 OS=Mus musculus GN=Pitpnm1 PE=1 SV=1	Pitpnm1	7	823368	116975	1.58248e+06				186696	170530	157160
Q3UHE1	Membrane-associated phosphatidylinositol transfer protein 3 OS=Mus musculus GN=Pitpnm3 PE=1 SV=2	Pitpnm3	1	60830.6		219928
P52480	Pyruvate kinase PKM OS=Mus musculus GN=Pkm PE=1 SV=4	Pkm	2	616424	12291.1	734137	20779	9616.45	35257.7	69978.7	88854.2	80885
Q68FH0	Plakophilin-4 OS=Mus musculus GN=Pkp4 PE=1 SV=1	Pkp4	16	1.85994e+06	779003	2.87616e+06	708388	678536	605634	869398	915010	821970
Q9QXS1	Plectin OS=Mus musculus GN=Plec PE=1 SV=3	Plec	5	334017	27330.5	428195	3824.56		5440.16	35652.5	26721.6	23974.6
P60202	Myelin proteolipid protein OS=Mus musculus GN=Plp1 PE=1 SV=2	Plp1	1	237480	16226.4	190291	11209.4		6926.14	64439.8	64211.9	55624.1
Q7TME0	Phospholipid phosphatase-related protein type 4 OS=Mus musculus GN=Plppr4 PE=1 SV=2	Plppr4	7	758304	66582.1	1.71832e+06	5555.2		5157.02	143188	129913	122491
Q8BSS9	Liprin-alpha-2 OS=Mus musculus GN=Ppfia2 PE=1 SV=2	Ppfia2	5	330571	14090.8	1.04697e+06			5759.83	217353	237454	222430
P60469	Liprin-alpha-3 OS=Mus musculus GN=Ppfia3 PE=1 SV=2	Ppfia3	3	272232		453781				18689.3	10923.9	16598
P17742	Peptidyl-prolyl cis-trans isomerase A OS=Mus musculus GN=Ppia PE=1 SV=2	Ppia	2	152863		397876	23580.1		13968.3	44419.4	55147.6	11865.6
P49443	Protein phosphatase 1A OS=Mus musculus GN=Ppm1a PE=1 SV=1	Ppm1a	5	1.34152e+06	240397	2726491	9707.9		9433.16	381167	350515	420320
P62137	Serine/threonine-protein phosphatase PP1-alpha catalytic subunit OS=Mus musculus GN=Ppp1ca PE=1 SV=1	Ppp1ca	3	706632	10298.7	1.36974e+06				42348.7	54500.4	43317.7
P63087	Serine/threonine-protein phosphatase PP1-gamma catalytic subunit OS=Mus musculus GN=Ppp1cc PE=1 SV=1	Ppp1cc	1	3.44804e+06	110711	3.65951e+06	6478.1		6734.11	285756	261157	268469
Q9DCL8	Protein phosphatase inhibitor 2 OS=Mus musculus GN=Ppp1r2 PE=1 SV=3	Ppp1r2	2	305763	82233.9	423105				113237	109494	102621
Q6R891	Neurabin-2 OS=Mus musculus GN=Ppp1r9b PE=1 SV=1	Ppp1r9b	6	1.08208e+06	299769	1.78086e+06	11852.1		6991.19	381614	232979	220370
Q60996	Serine/threonine-protein phosphatase 2A 56 kDa regulatory subunit gamma isoform OS=Mus musculus GN=Ppp2r5c PE=1 SV=2	Ppp2r5c	5	997885	193339	2.2003e+06		193491	113393	162037	24766.1	139204
P63328	Serine/threonine-protein phosphatase 2B catalytic subunit alpha isoform OS=Mus musculus GN=Ppp3ca PE=1 SV=1	Ppp3ca	13	6.96296e+06	812475	8.32585e+06	79165.8	17199.2	8201.31	1.29635e+06	1.35869e+06	1.48882e+06
Q7TSI3	Serine/threonine-protein phosphatase 6 regulatory subunit 1 OS=Mus musculus GN=Ppp6r1 PE=1 SV=1	Ppp6r1	3	250083	73768.5	452029			5933.07	71889.5	69121.7	1.50151e+06
Q8R3Q2	Serine/threonine-protein phosphatase 6 regulatory subunit 2 OS=Mus musculus GN=Ppp6r2 PE=1 SV=1	Ppp6r2	5	448060	7305.06	1.21656e+06	8961.67		5179.64	6827.48	17233.8
P35700	Peroxiredoxin-1 OS=Mus musculus GN=Prdx1 PE=1 SV=1	Prdx1	5	1.37271e+06	16213.6	2.60848e+06			5125.92	108517	9631.61	84558.9
Q61171	Peroxiredoxin-2 OS=Mus musculus GN=Prdx2 PE=1 SV=3	Prdx2	6	2.22941e+06	338142	3.18862e+06	285939	107208	367002	660641	669568	570027
P12367	cAMP-dependent protein kinase type II-alpha regulatory subunit OS=Mus musculus GN=Prkar2a PE=1 SV=2	Prkar2a	14	1.23902e+07	2.40342e+06	1.91395e+07	606255	226992	540322	2.99876e+06	3.16752e+06	2.91147e+06
P31324	cAMP-dependent protein kinase type II-beta regulatory subunit OS=Mus musculus GN=Prkar2b PE=1 SV=3	Prkar2b	6	2.70005e+06	458848	3.92053e+06	296849	93580.6	304556	862216	873876	817930
P63318	Protein kinase C gamma type OS=Mus musculus GN=Prkcg PE=1 SV=1	Prkcg	2	89078		122903
E9PUL5	Proline-rich transmembrane protein 2 OS=Mus musculus GN=Prrt2 PE=1 SV=1	Prrt2	5	1.02818e+06	206865	1.12699e+06	28950.7			279634	258688	278036
Q8BIW1	Exopolyphosphatase PRUNE1 OS=Mus musculus GN=Prune1 PE=1 SV=1	Prune1	16	6.02957e+06	298480	1.00645e+07	5386.69			466378	552464	508252
Q52KR3	Protein prune homolog 2 OS=Mus musculus GN=Prune2 PE=1 SV=2	Prune2	3	633536	120466	996721				186093	173502	180494
O35226	26S proteasome non-ATPase regulatory subunit 4 OS=Mus musculus GN=Psmd4 PE=1 SV=1	Psmd4	1			103538
Q9QVP9	Protein-tyrosine kinase 2-beta OS=Mus musculus GN=Ptk2b PE=1 SV=2	Ptk2b	2	170732		303844				6108.13	5357.14
P35235	Tyrosine-protein phosphatase non-receptor type 11 OS=Mus musculus GN=Ptpn11 PE=1 SV=2	Ptpn11	2	216883	35054.3	590152	7639	12320.7	5126.63	69400.6	74905.8	87828.4
Q6PB44	Tyrosine-protein phosphatase non-receptor type 23 OS=Mus musculus GN=Ptpn23 PE=1 SV=2	Ptpn23	2			137996	4528.27				8712.79	13380.6
P42669	Transcriptional activator protein Pur-alpha OS=Mus musculus GN=Pura PE=1 SV=1	Pura	1	70665		184970
O35295	Transcriptional activator protein Pur-beta OS=Mus musculus GN=Purb PE=1 SV=3	Purb	5	651233	159911	1.00148e+06	8810.84	2698.63	12224.7	207697	165889	180104
P61027	Ras-related protein Rab-10 OS=Mus musculus GN=Rab10 PE=1 SV=1	Rab10	3	312151	13889.6	279960		4742.11		45997.8	35651.5	51922
G3XA57	Rab11 family-interacting protein 2 OS=Mus musculus GN=Rab11fip2 PE=1 SV=1	Rab11fip2	1	22338.6		114948
P62821	Ras-related protein Rab-1A OS=Mus musculus GN=Rab1A PE=1 SV=3	Rab1A	7	2.14337e+06	232029	2.64433e+06	39314.8		33426.6	435676	454576	1.47886e+06
P35282	Ras-related protein Rab-21 OS=Mus musculus GN=Rab21 PE=1 SV=4	Rab21	1	63612.1		85569.5				17191	14231.8	15698
Q99P58	Ras-related protein Rab-27B OS=Mus musculus GN=Rab27b PE=1 SV=3	Rab27b	2	252926	11081.2	321892				94988.2	86578.2	118289
P63011	Ras-related protein Rab-3A OS=Mus musculus GN=Rab3a PE=1 SV=1	Rab3a	8	2.4142e+07	931622	3.60008e+07	166827	44935.1	18748.8	4.48718e+06	3.95779e+06	4.3878e+06
Q9CZT8	Ras-related protein Rab-3B OS=Mus musculus GN=Rab3b PE=1 SV=1	Rab3b	3	913501	163634	1.25232e+06	35100.6	92548.3		175819	426824	226898
P62823	Ras-related protein Rab-3C OS=Mus musculus GN=Rab3c PE=1 SV=1	Rab3c	3	748790	105948	1.04541e+06				87157.5	107302	82880.9
P63001	Ras-related C3 botulinum toxin substrate 1 OS=Mus musculus GN=Rac1 PE=1 SV=1	Rac1	2	163778		369856
P63321	Ras-related protein Ral-A OS=Mus musculus GN=Rala PE=1 SV=1	Rala	1	159906		419096					46960.5
Q9JIW9	Ras-related protein Ral-B OS=Mus musculus GN=Ralb PE=1 SV=1	Ralb	1	598235	31512.8	570745				41453.5	40351.8	86227.2
Q5SVL6	Rap1 GTPase-activating protein 2 OS=Mus musculus GN=Rap1gap2 PE=1 SV=1	Rap1gap2	2	187750		509599
Q9Z268	RasGAP-activating-like protein 1 OS=Mus musculus GN=Rasal1 PE=1 SV=2	Rasal1	4	310272	31206.2	746411				77758	76332.5	88023.2
Q80U40	RIMS-binding protein 2 OS=Mus musculus GN=Rimbp2 PE=1 SV=3	Rimbp2	3	325256	15712.9	886056				26128.8	17180	58008.8
Q99NE5	Regulating synaptic membrane exocytosis protein 1 OS=Mus musculus GN=Rims1 PE=1 SV=2	Rims1	4	102390	4541.27	330476				8157.99		7973.3
Q8BFU3	RING finger protein 214 OS=Mus musculus GN=Rnf214 PE=1 SV=1	Rnf214	3	105530		337515				47801	37268.3	22641.7
Q3TDK6	Protein rogdi homolog OS=Mus musculus GN=Rogdi PE=1 SV=2	Rogdi	6	7.27758e+06	329974	5.18073e+06	9878.05		7115.38	1.03027e+06	985327	1.00176e+06
P47708	Rabphilin-3A OS=Mus musculus GN=Rph3a PE=1 SV=2	Rph3a	3	321476	19828.8	710192				54085.1	39449.5	36357.6
P62983	Ubiquitin-40S ribosomal protein S27a OS=Mus musculus GN=Rps27a PE=1 SV=2	Rps27a	5	3.22307e+06	584746	5.86281e+06	240453	138090	614798	923890	1.37017e+06	1.27189e+06
Q8K0T0	Reticulon-1 OS=Mus musculus GN=Rtn1 PE=1 SV=1	Rtn1	7	1.73078e+06	245299	4.15736e+06	76350	10991.5	103808	2.04597e+06	2.18784e+06	398160
Q9ES97	Reticulon-3 OS=Mus musculus GN=Rtn3 PE=1 SV=2	Rtn3	30	1.04645e+07	1.21758e+06	2.27263e+07	222648	39269.9	184499	2.03085e+06	2.06004e+06	2.069e+06
Q99P72	Reticulon-4 OS=Mus musculus GN=Rtn4 PE=1 SV=2	Rtn4	33	1.57763e+07	3.86088e+06	3.17178e+07	711624	1.23923e+06	1.25835e+06	4.28397e+06	4.13083e+06	4.09236e+06
Q9D394	Protein RUFY3 OS=Mus musculus GN=Rufy3 PE=1 SV=1	Rufy3	40	1.08514e+08	9.53508e+06	1.50693e+08	378271	62833.3	163550	1.98677e+07	1.80865e+07	2.06429e+07
Q8C8N2	Protein SCAI OS=Mus musculus GN=Scai PE=1 SV=2	Scai	11	3.03764e+06	131923	4.72236e+06	14254.2		26086.3	445704	524703	463054
Q8K021	Secretory carrier-associated membrane protein 1 OS=Mus musculus GN=Scamp1 PE=1 SV=1	Scamp1	13	1.8509e+07	3.08914e+06	2.47739e+07	17765.2		20024.5	4.43319e+06	4.48064e+06	5.13951e+06
Q9CZC8	Secernin-1 OS=Mus musculus GN=Scrn1 PE=1 SV=1	Scrn1	5	2.36945e+06	653370	4.07633e+06	14844.8		6668.78	576429	657238	585347
Q8C1B7	Septin-11 OS=Mus musculus GN=Sept11 PE=1 SV=4	Sept11	2	78353.7		200107
Q9Z1S5	Neuronal-specific septin-3 OS=Mus musculus GN=Sept3 PE=1 SV=2	Sept3	4	1.05262e+06	41001.1	2.01024e+06	14725.7		11846.6	236201	220207	216979
Q9Z2Q6	Septin-5 OS=Mus musculus GN=Sept5 PE=1 SV=2	Sept5	7	2963524	241155	5.52148e+06	57554.8		27987.2	594854	573820	535222
O55131	Septin-7 OS=Mus musculus GN=Sept7 PE=1 SV=1	Sept7	5	1.40816e+06	363394	2.25736e+06	78545.4	22697.5	64208.5	438546	403744	364722
Q80UG5	Septin-9 OS=Mus musculus GN=Sept9 PE=1 SV=1	Sept9	4	354381	41330.5	614519	5196.35		4753.78	53765.3	72419.2	69522.2
Q8VD37	SH3-containing GRB2-like protein 3-interacting protein 1 OS=Mus musculus GN=Sgip1 PE=1 SV=1	Sgip1	9	1.24766e+06	164662	2.64324e+06	24919.3	14649.1	9607.45	322983	268336	328158
Q62419	Endophilin-A2 OS=Mus musculus GN=Sh3gl1 PE=1 SV=1	Sh3gl1	12	2.61526e+07	2.84135e+06	3.11513e+07	92023.4	71845.7	49731.9	3.61905e+06	3.90738e+06	4.29334e+06
Q62420	Endophilin-A1 OS=Mus musculus GN=Sh3gl2 PE=1 SV=2	Sh3gl2	15	4.17846e+07	3.69309e+06	6.08729e+07	147199	20786.7	38618	6.7573e+06	7.58437e+06	8.43152e+06
Q62421	Endophilin-A3 OS=Mus musculus GN=Sh3gl3 PE=1 SV=1	Sh3gl3	6	3.63118e+06	174194	3.7443e+06	20350.5	25545.9		332822	369160	338056
Q8R3V5	Endophilin-B2 OS=Mus musculus GN=Sh3glb2 PE=1 SV=2	Sh3glb2	2	249108	9810.66	161017				30790.8	30067	37270
Q8R550	SH3 domain-containing kinase-binding protein 1 OS=Mus musculus GN=Sh3kbp1 PE=1 SV=1	Sh3kbp1	9	888293	57082.9	3.23796e+06				67349.9	37074.8	79953.5
D3YZU1	SH3 and multiple ankyrin repeat domains protein 1 OS=Mus musculus GN=Shank1 PE=1 SV=1	Shank1	7	431516	60441	1.50199e+06	21469.5		7618.44	87639.3	70073.8	67039.6
Q80Z38	SH3 and multiple ankyrin repeat domains protein 2 OS=Mus musculus GN=Shank2 PE=1 SV=2	Shank2	46	2.83644e+07	6.11657e+06	5.59769e+07	996354	291292	871069	7.86094e+06	7.70059e+06	7.69795e+06
Q4ACU6	SH3 and multiple ankyrin repeat domains protein 3 OS=Mus musculus GN=Shank3 PE=1 SV=3	Shank3	14	1.11373e+06	209980	2.62411e+06	42174.3	7687.59	45854.2	310979	306690	274383
Q3UH99	Protein shisa-6 homolog OS=Mus musculus GN=Shisa6 PE=1 SV=1	Shisa6	4	305458	73940.2	458108			5349.09	49418.5	44023.6	44950.6
A2ALU4	Protein Shroom2 OS=Mus musculus GN=Shroom2 PE=1 SV=1	Shroom2	5	589101	74417.6	913019				178733	156037	160239
Q8C0T5	Signal-induced proliferation-associated 1-like protein 1 OS=Mus musculus GN=Sipa1l1 PE=1 SV=2	Sipa1l1	16	2.39719e+06	482267	4.75639e+06	12737.3	7806.51	4967.99	704139	719583	690443
Q80TE4	Signal-induced proliferation-associated 1-like protein 2 OS=Mus musculus GN=Sipa1l2 PE=1 SV=3	Sipa1l2	1			34667.4
P97797	Tyrosine-protein phosphatase non-receptor type substrate 1 OS=Mus musculus GN=Sirpa PE=1 SV=1	Sirpa	5	1.35094e+06	73142.6	1.93851e+06	11984.9		19503.2	181329	176901	169122
Q8VDQ8	NAD-dependent protein deacetylase sirtuin-2 OS=Mus musculus GN=Sirt2 PE=1 SV=2	Sirt2	2	145693		322149				27612.3	35256.2	26418.4
A2AQ25	Sickle tail protein OS=Mus musculus GN=Skt PE=1 SV=1	Skt	28	5.34858e+06	1.00743e+06	1.13318e+07	44365.7		18140	1.31098e+06	1.34687e+06	1.39702e+06
Q91V14	Solute carrier family 12 member 5 OS=Mus musculus GN=Slc12a5 PE=1 SV=2	Slc12a5	3	421814	92386.3	596664	53829.6	18315.1	48562.8	163967	152758	141917
Q8BLE7	Vesicular glutamate transporter 2 OS=Mus musculus GN=Slc17a6 PE=1 SV=1	Slc17a6	5	8.23074e+06	408983	9.04539e+06				874101	897671	674323
Q3TXX4	Vesicular glutamate transporter 1 OS=Mus musculus GN=Slc17a7 PE=1 SV=2	Slc17a7	2	2.37763e+06	794015	2.1515e+06	735776	1.32022e+06	1.27605e+06	723676	1.14634e+06	1.80297e+06
P43006	Excitatory amino acid transporter 2 OS=Mus musculus GN=Slc1a2 PE=1 SV=1	Slc1a2	5	3.39902e+06	106489	4.42881e+06	38322.4	14216.4	10408	427738	369737	358311
Q8VEM8	Phosphate carrier protein, mitochondrial OS=Mus musculus GN=Slc25a3 PE=1 SV=1	Slc25a3	5	2.31085e+06	138456	2.25931e+06	65654.1	3779.9	32639.5	342253	315243	328177
P48962	ADP/ATP translocase 1 OS=Mus musculus GN=Slc25a4 PE=1 SV=4	Slc25a4	6	4.47364e+06	343045	3.71961e+06	253247	26993.5	143752	1.18115e+06	1.04821e+06	1.10842e+06
O35633	Vesicular inhibitory amino acid transporter OS=Mus musculus GN=Slc32a1 PE=1 SV=3	Slc32a1	3	867790	123063	1.59219e+06				226132	273161	274196
P10852	4F2 cell-surface antigen heavy chain OS=Mus musculus GN=Slc3a2 PE=1 SV=1	Slc3a2	1	142689		224464
Q8BGY9	High affinity choline transporter 1 OS=Mus musculus GN=Slc5a7 PE=1 SV=1	Slc5a7	1	133809		525725				9148.83	14098.8	13758.8
P31648	Sodium- and chloride-dependent GABA transporter 1 OS=Mus musculus GN=Slc6a1 PE=1 SV=2	Slc6a1	1	182123	5437.74	372714				10610.3	14433.3
Q8BJI1	Sodium-dependent neutral amino acid transporter SLC6A17 OS=Mus musculus GN=Slc6a17 PE=1 SV=1	Slc6a17	14	3.07984e+07	6.23979e+06	4.41366e+07	11669.9		11861.4	5.79972e+06	6.35868e+06	6.00403e+06
Q6PGE7	Sodium-dependent proline transporter OS=Mus musculus GN=Slc6a7 PE=1 SV=1	Slc6a7	3	178936		279135		46703.7
Q8BXR1	Probable cationic amino acid transporter OS=Mus musculus GN=Slc7a14 PE=1 SV=1	Slc7a14	4	1.58544e+06	75152.4	2.45832e+06				343253	362118	296185
Q8K596	Sodium/calcium exchanger 2 OS=Mus musculus GN=Slc8a2 PE=1 SV=1	Slc8a2	4	247665	34466.4	366746	8650.25			68697.7	65767	40549.1
Q810B7	SLIT and NTRK-like protein 5 OS=Mus musculus GN=Slitrk5 PE=2 SV=1	Slitrk5	3	652151		1.36139e+06					9816.64	10028.5
Q91VZ6	Stromal membrane-associated protein 1 OS=Mus musculus GN=Smap1 PE=1 SV=1	Smap1	7	8.67202e+06	1.3271e+06	1.75206e+07	50875.7	44206.4	10642.1	1.46706e+06	1.78828e+06	1.88009e+06
Q7TN29	Stromal membrane-associated protein 2 OS=Mus musculus GN=Smap2 PE=1 SV=1	Smap2	3	640264		1.1873e+06						34305.9
Q3UMB5	Guanine nucleotide exchange protein SMCR8 OS=Mus musculus GN=Smcr8 PE=1 SV=2	Smcr8	9	1.02664e+06	57610.3	3.17769e+06				207344	211914	148249
P60879	Synaptosomal-associated protein 25 OS=Mus musculus GN=Snap25 PE=1 SV=1	Snap25	16	9.95451e+06	1.44419e+06	7.77059e+06	88253.2		52778.5	1.85151e+06	1.75738e+06	1.54386e+06
Q9ERB0	Synaptosomal-associated protein 29 OS=Mus musculus GN=Snap29 PE=1 SV=1	Snap29	5	1.9799e+06	15515.9	2.14661e+06	6510.73		5474.86	175405	180797	146119
Q8R570	Synaptosomal-associated protein 47 OS=Mus musculus GN=Snap47 PE=1 SV=1	Snap47	7	879700	74058.1	1.35323e+06				110565	102466	103898
Q61548	Clathrin coat assembly protein AP180 OS=Mus musculus GN=Snap91 PE=1 SV=1	Snap91	20	1.24795e+07	2.03422e+06	1.81263e+07	284256	74944.2	376858	1.88969e+06	1.87745e+06	1.62859e+06
O55042	Alpha-synuclein OS=Mus musculus GN=Snca PE=1 SV=2	Snca	4	814347	43362.3	2.735e+06				122299	117542	128825
Q91ZZ3	Beta-synuclein OS=Mus musculus GN=Sncb PE=1 SV=1	Sncb	7	1.37513e+07	1.31825e+06	1.84286e+07	317808	51571	188348	3.72035e+06	3.61993e+06	3.65269e+06
Q9WV80	Sorting nexin-1 OS=Mus musculus GN=Snx1 PE=1 SV=1	Snx1	5	709736		1.24053e+06				62653.6	57697	59520.3
Q8CE50	Sorting nexin-30 OS=Mus musculus GN=Snx30 PE=1 SV=1	Snx30	3	667566	16765.4	1.05758e+06				32735.8	28022	28550.8
Q9CY18	Sorting nexin-7 OS=Mus musculus GN=Snx7 PE=1 SV=1	Snx7	2	200857	20219.9	235893				81475.4	53558.7	52737.3
Q62417	Sorbin and SH3 domain-containing protein 1 OS=Mus musculus GN=Sorbs1 PE=1 SV=2	Sorbs1	17	1.74785e+06	83152.3	3.96382e+06				205692	143832	189540
Q3UTJ2	Sorbin and SH3 domain-containing protein 2 OS=Mus musculus GN=Sorbs2 PE=1 SV=2	Sorbs2	6	583441	15236.4	1.60294e+06				39356.1	33442	54078.1
P16546	Spectrin alpha chain, non-erythrocytic 1 OS=Mus musculus GN=Sptan1 PE=1 SV=4	Sptan1	10	416550	38289.4	950115	11239.9		113685	63142.7	61800.6	75424.1
Q62261	Spectrin beta chain, non-erythrocytic 1 OS=Mus musculus GN=Sptbn1 PE=1 SV=2	Sptbn1	1	100435		126020				13295.3	10120.9	8758.03
Q9QWI6	SRC kinase signaling inhibitor 1 OS=Mus musculus GN=Srcin1 PE=1 SV=2	Srcin1	64	3.53739e+07	7.29561e+06	7.35888e+07	2.28506e+06	1.68077e+06	2.31755e+06	1.04595e+07	1.0748e+07	1.16436e+07
Q91Z67	SLIT-ROBO Rho GTPase-activating protein 2 OS=Mus musculus GN=Srgap2 PE=1 SV=2	Srgap2	2	145554	20821.2	283312			9316.81	50252.8	38642.1
P70297	Signal transducing adapter molecule 1 OS=Mus musculus GN=Stam PE=1 SV=3	Stam	4	380754		1.63571e+06	16337.4			84450.2	36758.6	74771.1
Q8CJ67	Double-stranded RNA-binding protein Staufen homolog 2 OS=Mus musculus GN=Stau2 PE=1 SV=1	Stau2	4	705168	112738	1.16598e+06	22726.4	3405.38	21431.8	196792	202270	174006
P54227	Stathmin OS=Mus musculus GN=Stmn1 PE=1 SV=2	Stmn1	9	1.10719e+07	1.23707e+06	1.06118e+07	194540	55678.8	257867	2.04768e+06	2.08734e+06	2.0357e+06
P22629	Streptavidin OS=Streptomyces avidinii PE=1 SV=1	Streptavidin	2	87538.5	71756	100216	302736	188261	568169	331047	316826	491721
Q8C079	Striatin-interacting protein 1 OS=Mus musculus GN=Strip1 PE=1 SV=2	Strip1	3	206827	14330.5	333386			5490.81	16330.1	18990.4	22858.1
O55106	Striatin OS=Mus musculus GN=Strn PE=1 SV=2	Strn	16	3.93509e+06	574939	1.14443e+07	41136.8	9268.34	19183.7	517086	554364	673199
Q9ERG2	Striatin-3 OS=Mus musculus GN=Strn3 PE=1 SV=1	Strn3	5	478772	6458.69	1.21338e+06	9097.35	8529.51	3631.24	40277.5		33214.7
P58404	Striatin-4 OS=Mus musculus GN=Strn4 PE=1 SV=2	Strn4	9	1.77754e+06	118133	4.42657e+06	36451.5		49474.8	263698	266874	329437
O35526	Syntaxin-1A OS=Mus musculus GN=Stx1a PE=1 SV=3	Stx1a	2	362511	7372.72	448542				37253	40660.7	36083.3
P61264	Syntaxin-1B OS=Mus musculus GN=Stx1b PE=1 SV=1	Stx1b	5	6.91952e+06	729602	8.77495e+06	139231	43100	67039.4	1.21982e+07	1.23352e+07	1.22756e+07
O08599	Syntaxin-binding protein 1 OS=Mus musculus GN=Stxbp1 PE=1 SV=2	Stxbp1	18	9.31896e+06	3.33744e+06	1.48129e+07	101506	46634.2	67466.8	1.49903e+06	1.29512e+06	1.14848e+06
Q8K400	Syntaxin-binding protein 5 OS=Mus musculus GN=Stxbp5 PE=1 SV=3	Stxbp5	4	396307		1.37456e+06		3716.57		13810.4	7679.07
Q5DQR4	Syntaxin-binding protein 5-like OS=Mus musculus GN=Stxbp5l PE=1 SV=1	Stxbp5l	2	368723	55149.8	534237				121677	197590	146999
Q9CX34	Protein SGT1 homolog OS=Mus musculus GN=Sugt1 PE=1 SV=3	Sugt1	7	1.60639e+06	271607	2.31421e+06	23633.8	18773.9	18293.4	97182.7	449689	460061
Q9JIS5	Synaptic vesicle glycoprotein 2A OS=Mus musculus GN=Sv2a PE=1 SV=1	Sv2a	11	2.9806e+07	2.48769e+06	3.89463e+07	16049.2	8840.25	10974.2	4.10656e+06	4.46366e+06	3.92687e+06
Q8BG39	Synaptic vesicle glycoprotein 2B OS=Mus musculus GN=Sv2b PE=1 SV=1	Sv2b	6	1.66906e+06	154129	2.70142e+06		4506.96		301237	316398	337672
Q69ZS6	Synaptic vesicle glycoprotein 2C OS=Mus musculus GN=Sv2c PE=1 SV=2	Sv2c	2	121517	57906.4	610568				99111.7	104630	135013
O88935	Synapsin-1 OS=Mus musculus GN=Syn1 PE=1 SV=2	Syn1	56	1.46337e+09	3.16164e+08	2.36885e+09	7.70926e+06	2.50028e+07	1.20358e+07	4.02818e+08	3.94608e+08	3.73168e+08
Q64332	Synapsin-2 OS=Mus musculus GN=Syn2 PE=1 SV=2	Syn2	23	1.60447e+08	1.39753e+07	2.50533e+08	430273	210354	354974	2.8968e+07	3.02378e+07	2.73827e+07
Q8JZP2	Synapsin-3 OS=Mus musculus GN=Syn3 PE=1 SV=2	Syn3	9	4.41698e+06	999993	5.81716e+06				1.10815e+06	1.0543e+06	1.03808e+06
A2ANU3	Synapse differentiation-inducing gene protein 1 OS=Mus musculus GN=Syndig1 PE=1 SV=1	Syndig1	2	63798.7		163558
F6SEU4	Ras/Rap GTPase-activating protein SynGAP OS=Mus musculus GN=Syngap1 PE=1 SV=2	Syngap1	19	4.05292e+06	573572	9.58577e+06	167546	23143.8	105748	954678	898527	859016
Q8R191	Synaptogyrin-3 OS=Mus musculus GN=Syngr3 PE=1 SV=1	Syngr3	7	1.02852e+08	1.44228e+07	1.5459e+08	163318	58852.2	72123.5	2.10542e+07	2.13713e+07	2.15789e+07
Q8CHC4	Synaptojanin-1 OS=Mus musculus GN=Synj1 PE=1 SV=3	Synj1	16	2.52551e+06	373024	4.68764e+06	15208.2	5383.41	16523.7	539408	507731	535146
Q8CC35	Synaptopodin OS=Mus musculus GN=Synpo PE=1 SV=2	Synpo	23	1.53659e+07	4.21643e+06	2.51253e+07	363726	132829	285868	3.94314e+06	3.81897e+06	4.16306e+06
Q5SV85	Synergin gamma OS=Mus musculus GN=Synrg PE=1 SV=1	Synrg	7	249017	11997	755280				23428.4
Q62277	Synaptophysin OS=Mus musculus GN=Syp PE=1 SV=2	Syp	1	3.09081e+06	46965	5.5402e+06				459786	681933	683565
P46096	Synaptotagmin-1 OS=Mus musculus GN=Syt1 PE=1 SV=1	Syt1	23	3.48758e+07	4.68589e+06	5.37852e+07	450685	211858	217054	5.15845e+06	5.6891e+06	7.07553e+06
Q920N7	Synaptotagmin-12 OS=Mus musculus GN=Syt12 PE=1 SV=1	Syt12	2	272176	37976.4	404294				46921.4	80529.1	88797.8
Q920M7	Synaptotagmin-17 OS=Mus musculus GN=Syt17 PE=1 SV=1	Syt17	6	509284	61123.3	1.16891e+06	5159.42	152083	166117	84285.5	85075.3	88661.6
Q9R0N7	Synaptotagmin-7 OS=Mus musculus GN=Syt7 PE=1 SV=1	Syt7	4	188528		449514
Q571K4	TGF-beta-activated kinase 1 and MAP3K7-binding protein 3 OS=Mus musculus GN=Tab3 PE=1 SV=2	Tab3	3	594929	34363.8	573829				173664	23262.7	33494.6
Q9R1Q8	Transgelin-3 OS=Mus musculus GN=Tagln3 PE=1 SV=1	Tagln3	12	1.34545e+07	1.71635e+06	1.38168e+07	116528	30598.8	93287.9	3.00906e+06	3.01327e+06	3.12305e+06
A2A690	Protein TANC2 OS=Mus musculus GN=Tanc2 PE=1 SV=1	Tanc2	5	242777	96738.5	897998	5965.85		5425.4	83073.1	90348.6	81654.3
Q921F2	TAR DNA-binding protein 43 OS=Mus musculus GN=Tardbp PE=1 SV=1	Tardbp	2	185554	40757.9	202581	8612.19			51449.4	43429.4	43088.3
Q9D1E6	Tubulin-folding cofactor B OS=Mus musculus GN=Tbcb PE=1 SV=2	Tbcb	3	138321	28663	397703		3248.49		49805.4	51615.8	49636.8
Q8CCT4	Transcription elongation factor A protein-like 5 OS=Mus musculus GN=Tceal5 PE=1 SV=1	Tceal5	1	74766	29478.4	143691	12750	4764.47	18113	45755.1	42299.3	42909.2
Q80VP0	Tectonin beta-propeller repeat-containing protein 1 OS=Mus musculus GN=Tecpr1 PE=1 SV=1	Tecpr1	5	350823	28428.1	739624				65612.3	112877	129551
P39447	Tight junction protein ZO-1 OS=Mus musculus GN=Tjp1 PE=1 SV=2	Tjp1	19	3.59568e+06	494282	7.5638e+06	38583.2	10374.9	106818	679867	692024	656653
Q9JKK7	Tropomodulin-2 OS=Mus musculus GN=Tmod2 PE=1 SV=2	Tmod2	5	765572	25776.9	777205	30522.9	6279.16	17973.5	114862	92198.3	95057.4
P83510	Traf2 and NCK-interacting protein kinase OS=Mus musculus GN=Tnik PE=1 SV=2	Tnik	4	348838	27625.5	840323				61501.6	61198	190462
Q8BKI2	Trinucleotide repeat-containing gene 6B protein OS=Mus musculus GN=Tnrc6b PE=1 SV=2	Tnrc6b	2	54443.2		55524.1				5804.48
O88746	Target of Myb protein 1 OS=Mus musculus GN=Tom1 PE=1 SV=1	Tom1	2	541831	55142.4	928639				95697.6	114395	55832.1
Q5SRX1	TOM1-like protein 2 OS=Mus musculus GN=Tom1l2 PE=1 SV=1	Tom1l2	5	746355	15939.2	927302				29567.2	47693	91518.5
Q62393	Tumor protein D52 OS=Mus musculus GN=Tpd52 PE=1 SV=2	Tpd52	4	737212	151039	779914				221980	193306	221300
Q9CYZ2	Tumor protein D54 OS=Mus musculus GN=Tpd52l2 PE=1 SV=1	Tpd52l2	10	4.75394e+06	467737	5.99131e+06	35302.6		12096	894892	719873	772777
P17751	Triosephosphate isomerase OS=Mus musculus GN=Tpi1 PE=1 SV=4	Tpi1	3	310250	55011.6	254459	58940.7	5453.49	43380	106277	86754.8	96653.1
Q7TQD2	Tubulin polymerization-promoting protein OS=Mus musculus GN=Tppp PE=1 SV=1	Tppp	17	3.256e+07	9.98694e+06	3.6817e+07	768369	246765	609851	1.0312e+07	9.58144e+06	9.14304e+06
Q9CRB6	Tubulin polymerization-promoting protein family member 3 OS=Mus musculus GN=Tppp3 PE=1 SV=1	Tppp3	4	655968	7567.14	1364010				116641	99823.7	115033
Q8C7M3	E3 ubiquitin-protein ligase TRIM9 OS=Mus musculus GN=Trim9 PE=1 SV=2	Trim9	3	309823	78775.5	608605	6739.42		5122.86	95869.3	97422	108412
Q0KL02	Triple functional domain protein OS=Mus musculus GN=Trio PE=1 SV=3	Trio	2	235562		480730
P05213	Tubulin alpha-1B chain OS=Mus musculus GN=Tuba1b PE=1 SV=2	Tuba1b	4	1.13756e+07	1.34303e+06	1.93275e+07	350307	85391.8	164233	2.23294e+06	2.182e+06	2.15597e+06
P68368	Tubulin alpha-4A chain OS=Mus musculus GN=Tuba4a PE=1 SV=1	Tuba4a	2	534707		1.13215e+06				90316.7	77723	73142.9
Q7TMM9	Tubulin beta-2A chain OS=Mus musculus GN=Tubb2a PE=1 SV=1	Tubb2a	2	1.02307e+07	1.11054e+06	1.37206e+07	186066	45050.3	88997.6	1.35613e+06	1.21786e+06	1.51246e+06
Q9CWF2	Tubulin beta-2B chain OS=Mus musculus GN=Tubb2b PE=1 SV=1	Tubb2b	1	72640		158722
Q9ERD7	Tubulin beta-3 chain OS=Mus musculus GN=Tubb3 PE=1 SV=1	Tubb3	3	503321		964796				399755	412746	307286
Q9D6F9	Tubulin beta-4A chain OS=Mus musculus GN=Tubb4a PE=1 SV=3	Tubb4a	3	74299.2		206968						16351.6
P68372	Tubulin beta-4B chain OS=Mus musculus GN=Tubb4b PE=1 SV=1	Tubb4b	1	853350		1.84728e+06				51346.2	52933.1	47442.7
P99024	Tubulin beta-5 chain OS=Mus musculus GN=Tubb5 PE=1 SV=1	Tubb5	2	1.28746e+06		2.4656e+06		86268.1		305600	183349	174287
Q922F4	Tubulin beta-6 chain OS=Mus musculus GN=Tubb6 PE=1 SV=1	Tubb6	1	145685		98241.4				26508.8	18376.7	14764.5
P10639	Thioredoxin OS=Mus musculus GN=Txn PE=1 SV=3	Txn	1				97911.7	41399.6	226560			61042.2
Q8CDN6	Thioredoxin-like protein 1 OS=Mus musculus GN=Txnl1 PE=1 SV=3	Txnl1	2	705546	69174.7	983298				109696	108376	125893
Q02053	Ubiquitin-like modifier-activating enzyme 1 OS=Mus musculus GN=Uba1 PE=1 SV=1	Uba1	3	213364		405797				34313.8	44725.9
Q91VX2	Ubiquitin-associated protein 2 OS=Mus musculus GN=Ubap2 PE=1 SV=1	Ubap2	3	131531	48302.1	252877	8279.7			51717.6	45854	48811.6
Q80X50	Ubiquitin-associated protein 2-like OS=Mus musculus GN=Ubap2l PE=1 SV=1	Ubap2l	7	907310	166499	2.13196e+06			9815.28	348978	251697	132361
P61082	NEDD8-conjugating enzyme Ubc12 OS=Mus musculus GN=Ube2m PE=1 SV=1	Ube2m	4	938607	40997.6	1.55481e+06				121102	109059	115725
Q99PL6	UBX domain-containing protein 6 OS=Mus musculus GN=Ubxn6 PE=1 SV=1	Ubxn6	7	855974	141733	1.41115e+06	10450.8	16453.9	23166.8	192985	194145	197601
A2RSJ4	UHRF1-binding protein 1-like OS=Mus musculus GN=Uhrf1bp1l PE=1 SV=2	Uhrf1bp1l	1			66261.2
Q4KUS2	Protein unc-13 homolog A OS=Mus musculus GN=Unc13a PE=1 SV=3	Unc13a	2	53699.8	5363.25	76046.7				11822.6	9317.06	12132.9
Q8BL48	RING finger protein unkempt homolog OS=Mus musculus GN=Unk PE=1 SV=1	Unk	1	65938.5		121916				10818.2	13668.1	12603
Q8BHG2	UPF0587 protein C1orf123 homolog OS=Mus musculus PE=1 SV=1	UPF0587	1	90847.9		125788
P56399	Ubiquitin carboxyl-terminal hydrolase 5 OS=Mus musculus GN=Usp5 PE=1 SV=1	Usp5	2	67622.7	24206.9	308912	6008.45				37765	40236
P63044	Vesicle-associated membrane protein 2 OS=Mus musculus GN=Vamp2 PE=1 SV=2	Vamp2	5	4.67692e+06	661543	3.79004e+06	21473.1	4390.81	6181.3	1.16241e+06	1.24101e+06	1.11858e+06
Q9QY76	Vesicle-associated membrane protein-associated protein B OS=Mus musculus GN=Vapb PE=1 SV=3	Vapb	2	256206		389768	16356.6	5694.2	21152.7	54363	51239.8
Q80TB8	Synaptic vesicle membrane protein VAT-1 homolog-like OS=Mus musculus GN=Vat1l PE=1 SV=2	Vat1l	1	171496	48216	207742				57018.8	58009.9	58600.9
Q8CDG3	Deubiquitinating protein VCIP135 OS=Mus musculus GN=Vcpip1 PE=1 SV=1	Vcpip1	3	132741	11976.2	243392				34979.7	26844.6	13794.5
Q60930	Voltage-dependent anion-selective channel protein 2 OS=Mus musculus GN=Vdac2 PE=1 SV=2	Vdac2	1	296878		450360				16642.6	23330.6	24623.7
Q60931	Voltage-dependent anion-selective channel protein 3 OS=Mus musculus GN=Vdac3 PE=1 SV=1	Vdac3	2	369735	38830.5	847506				40646	16032.2
Q3UVL4	Vacuolar protein sorting-associated protein 51 homolog OS=Mus musculus GN=Vps51 PE=1 SV=2	Vps51	3	384509		417629
P62761	Visinin-like protein 1 OS=Mus musculus GN=Vsnl1 PE=1 SV=2	Vsnl1	2	1.22273e+06	15128.1	833733				192018	293904	263735
Q6NVE8	WD repeat-containing protein 44 OS=Mus musculus GN=Wdr44 PE=1 SV=1	Wdr44	7	539411	63142.6	1.71106e+06				119599	107871	82161.4
Q8CGF6	WD repeat-containing protein 47 OS=Mus musculus GN=Wdr47 PE=1 SV=2	Wdr47	3	93584.8		627742				58918.3	72389.8	34819.7
Q920I9	WD repeat-containing protein 7 OS=Mus musculus GN=Wdr7 PE=1 SV=3	Wdr7	11	3.05934e+06	733282	5.38659e+06	8558.37	5155.84	4115.93	926916	868531	816458
P0C7L0	WAS/WASL-interacting protein family member 3 OS=Mus musculus GN=Wipf3 PE=1 SV=1	Wipf3	3	305340	130015	459326	18306.2			126937	122616	123757
Q80W47	WD repeat domain phosphoinositide-interacting protein 2 OS=Mus musculus GN=Wipi2 PE=1 SV=1	Wipi2	2	114709	7090.32	799188				22152.8	48762.8	37346.4
Q91WL8	WW domain-containing oxidoreductase OS=Mus musculus GN=Wwox PE=1 SV=1	Wwox	2	122243	2783.77	371315					8747.26	7593.99
Q8BYK6	YTH domain-containing family protein 3 OS=Mus musculus GN=Ythdf3 PE=1 SV=2	Ythdf3	2	480095	82715	668309	11288.8		12174.9	157007	150375	162089
P62259	14-3-3 protein epsilon OS=Mus musculus GN=Ywhae PE=1 SV=1	Ywhae	3	1.60255e+06	39780.4	1.62154e+06				139394	127980	122252
P61982	14-3-3 protein gamma OS=Mus musculus GN=Ywhag PE=1 SV=2	Ywhag	1	843733	115864	705683	53166.3	6620.8	39432.6	235496	226458	237093
P68254	14-3-3 protein theta OS=Mus musculus GN=Ywhaq PE=1 SV=1	Ywhaq	1	221997		213441				32846.4	25072.8	33037.8
Q8BJH1	Zinc finger C2HC domain-containing protein 1A OS=Mus musculus GN=Zc2hc1a PE=1 SV=1	Zc2hc1a	9	2.03624e+06	798731	3.5369e+06	13614.2	6200.86	12706.4	773702	743634	730435
Q9DAZ9	Abscission/NoCut checkpoint regulator OS=Mus musculus GN=Zfyve19 PE=1 SV=2	Zfyve19	1	130973	6106.04	183158	17783.7	9510.11		30615.5	23674.8	33852.2
Q62523	Zyxin OS=Mus musculus GN=Zyx PE=1 SV=2	Zyx	3	494885	72938.1	577897		3619.13		91625.7	82930.6	98244
