# Supplementary material for: Action potential-coupled Rho GTPase signaling drives presynaptic plasticity
Source: eLife. 2021 Jul 16;10:e63756. doi: 10.7554/eLife.63756 (PMC8285108; doi:10.7554/eLife.63756)
Supplement: Figure 2—source data 1. [file elife-63756-fig2-data1.xlsx]

## Sheet: Sheet1
Figure 2—source data 1. Candidate genes screened for HiUGE validation of the Synapsin iBioID proteome.
	#	Gene	Target Sequence	ORF	MIT Score	Figure or reason for exclusion
			(PAM is underlined)
	1	Abi2	TGAGTCCATCATGCATTATTCGG	+1	79	Figure 2C
	2	Add1	AGAAGAAGAGTGACTCCTGAAGG	+0	32	Figure 2D
	3	Ctnnd2	TCGCCCGACTCCTGGGTGTAAGG	+2	87	Figure 2E
	4	Cttn	GCTCTTCCCAGCCAACTATGTGG	+1	58	Figure 2F
	5	Cttnbp2	TGTAGGCAGGCCTATTTGTTTGG	+0	84	Figure 2G
	6	Cyfip2	GCCCCCAATCCACCAGTCATTGG	+1	87	Figure 2H
	7	Dmtn	GCCGGCAGGGATGTCAGAAGAGG	+2	59	Figure 2I
	8	Fam171b	ATTAGTTTAGGGGAATCAGTGGG	+2	83	Figure 2J
	9	Lasp1	GCTGCCAGCCAACTACGTGGAGG	+1	78	Figure 2K
	10	Nwd2	TAAACATCGTGTCAGTTATCTGG	+0	88	Figure 2L
	11	Ppp1r9b	GAACTCCAATTCTACTTAACAGG	+1	83	Figure 2M
	12	Tagln3	TGACGGGGTACGGGATGCCCAGG	+0	81	Figure 2N
	13	Trio	TTCAAGATAGGTCAAACTCTAGG	+0	81	Figure 2O
	14	Wipf3	AGTTATCTCTGAAGGCACTCCGG	+0	69	Figure 2P
	15	Ablim1	ATGTCGTTGCGTCTCCAAAGAGG	+0	91	low signal-to-noise ratio
	16	Arhgap1	GTGGTGAGCTCAGACCCCCTGGG	+1	44	low signal-to-noise ratio
	17	Bcr	TGTCTCTTGCTGTCAGGGGCAGG	+0	66	low signal-to-noise ratio
	18	Nebl	CAAACTCAATGTAATTTGCTGGG	+2	75	low signal-to-noise ratio
	19	Rac1	GAGGGGGACAGAGAACCGCTCGG	+2	58	low signal-to-noise ratio
			(with V5 donor to replace C-terminal
			of Rac1, V5-VLCPPPVKKRKRKCLLL)
	20	Ablim3	GAGCCTCAGCCTAGAAAAGCCGG	+2	72	signal below detection
	21	Arhgap44	GAGAGTACAGCCCTTTGATGTGG	+2	82	signal below detection
	22	Shank1	CCAGGAAAAATTTGAGAGCCCGG	+2	66	signal below detection
	23	Zyx	GGTCCATCTCAACTCAGGTCTGG	+2	81	signal below detection
